# Supplementary material
Source: PubMed Central journal article supplement (PMC7315425)
Supplement: ao0c00934_si_003.pdf [file ao0c00934_si_003.pdf]

## Supporting Information

### Polysubstituted imidazoles as LysoTracker Molecules: Their Syntheses via Iodine/H<sub>2</sub>O and Cell-Imaging Studies

Saswati Adhikary,<sup>a</sup> Leena Majumder,<sup>a</sup> Sourav Pakrashy,<sup>a</sup> Ravuri Srinath,<sup>c</sup> Kaustuv Mukherjee,<sup>d</sup> Chitra Mandal<sup>d</sup> and Biswadip Banerji<sup>\*,a,b</sup>

<sup>a</sup>*Organic and Medicinal Chemistry Division, Indian Institute of Chemical Biology (CSIR-IICB), 4 Raja S. C. Mullick Road, Kolkata, 700032, India.*

<sup>b</sup>*Academy of Scientific and Innovative Research (AcSIR), Indian Institute of Chemical Biology (CSIR-IICB), 4 Raja S. C. Mullick Road, Kolkata, 700032, India. Email: biswadip.banerji@gmail.com, biswadip@iicb.res.in; Fax: +91 33 24735197, +91 33 24723967; Tel : + 91 33 24995709.*

<sup>c</sup>*National Institute of Pharmaceutical Education and Research (NIPER-Kolkata), Chunilal Bhawan, Maniktala, Kolkata-700054, India.*

<sup>d</sup>*Cancer Biology & Inflammatory Disorder Division, Indian Institute of Chemical Biology (CSIR-IICB), 4 Raja S. C. Mullick Road, Kolkata, 700032, India.*

## Contents:

| <b>Table of contents:</b>                                                          | <b>Page No.</b> |
|------------------------------------------------------------------------------------|-----------------|
| <b>1. <math>^1\text{H}</math> and <math>^{13}\text{C}</math> NMR spectral data</b> | <b>S3-S60</b>   |
| <b>2. ORTEP diagram of product 3l</b>                                              | <b>S61</b>      |
| <b>3. X-ray crystallographic information of product 3l</b>                         | <b>S61-S62</b>  |
| <b>4. ORTEP diagram of product 5a</b>                                              | <b>S63</b>      |
| <b>5. X-ray crystallographic information of product 5a</b>                         | <b>S63-S64</b>  |
| <b>6. References</b>                                                               | <b>S64</b>      |

Figure S1:  $^1\text{H}$  NMR spectrum of 1-Benzyl-2,4,5-triphenyl-1H-imidazole (3a) in  $\text{CDCl}_3$ .

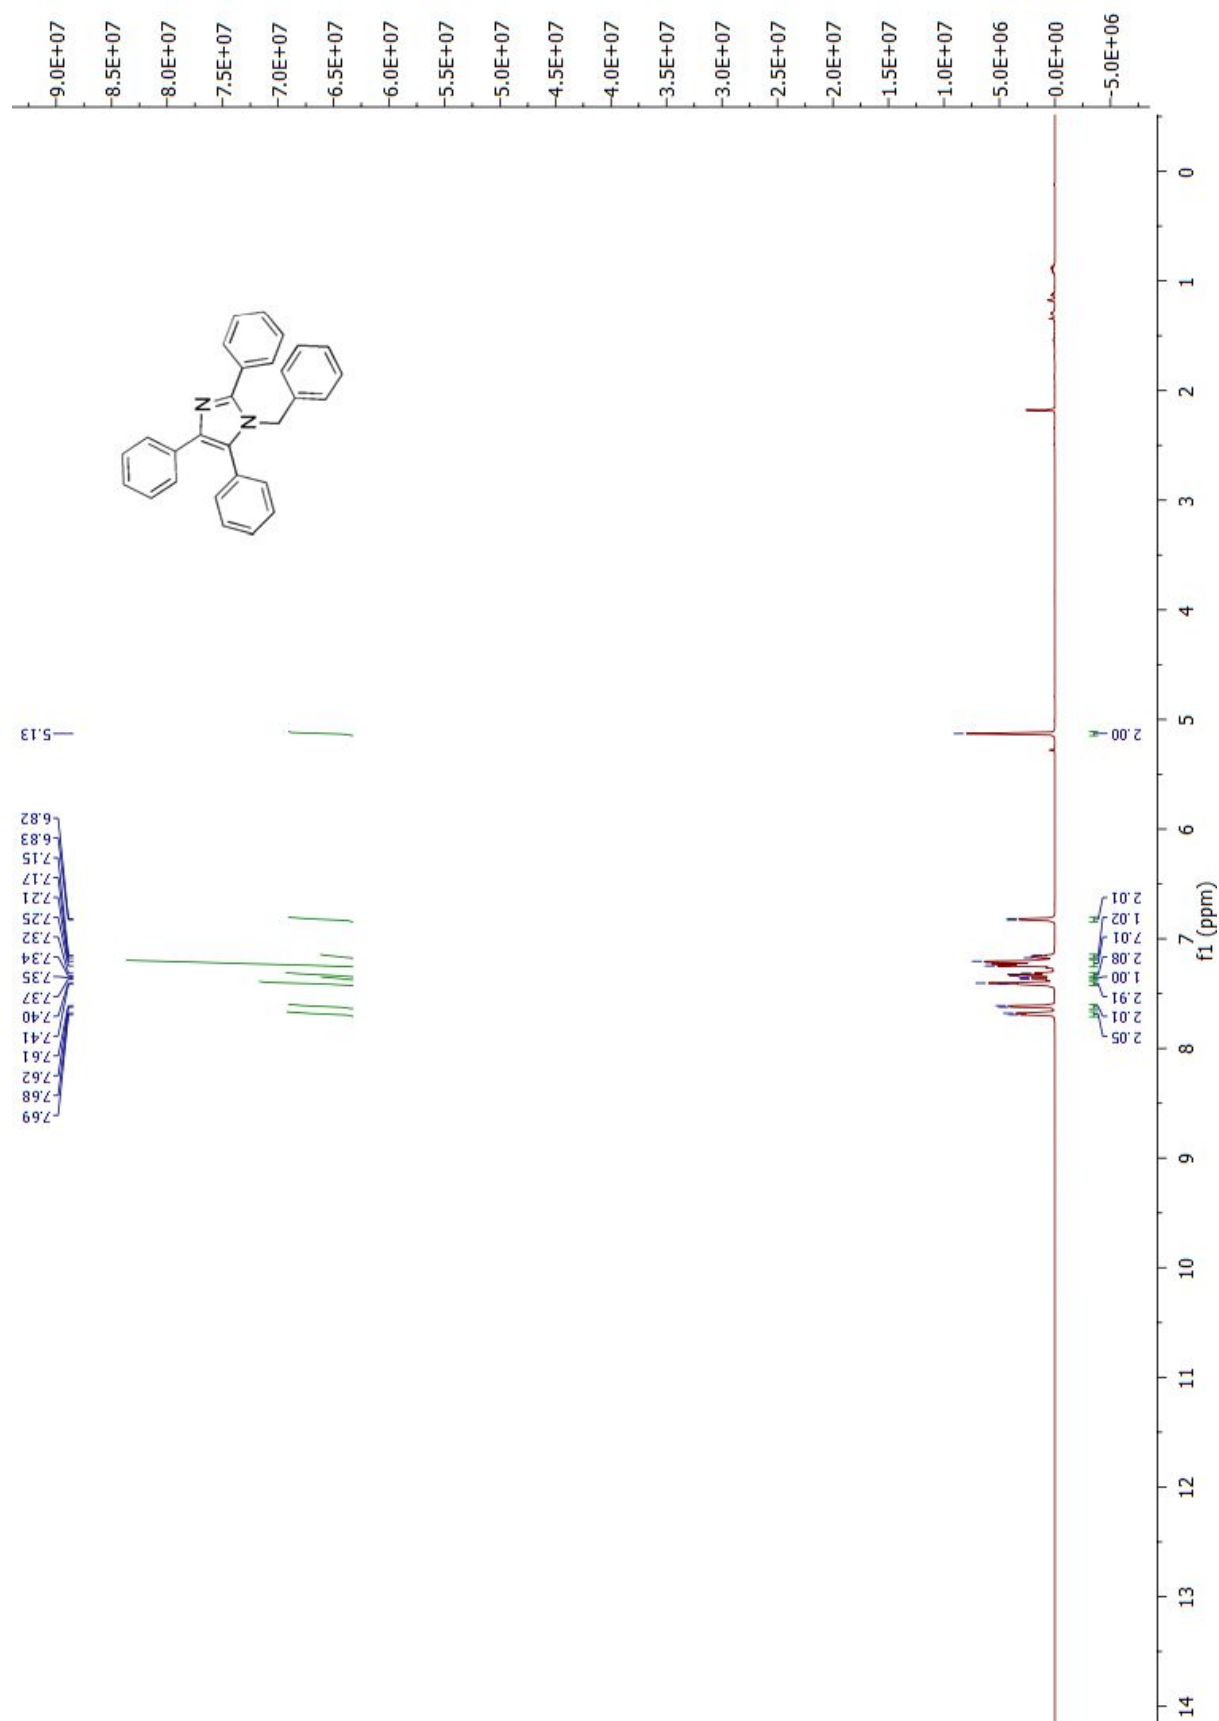

Figure S2:  $^{13}\text{C}$  NMR spectrum of 1-Benzyl-2,4,5-triphenyl-1H-imidazole (3a) in  $\text{CDCl}_3$ .

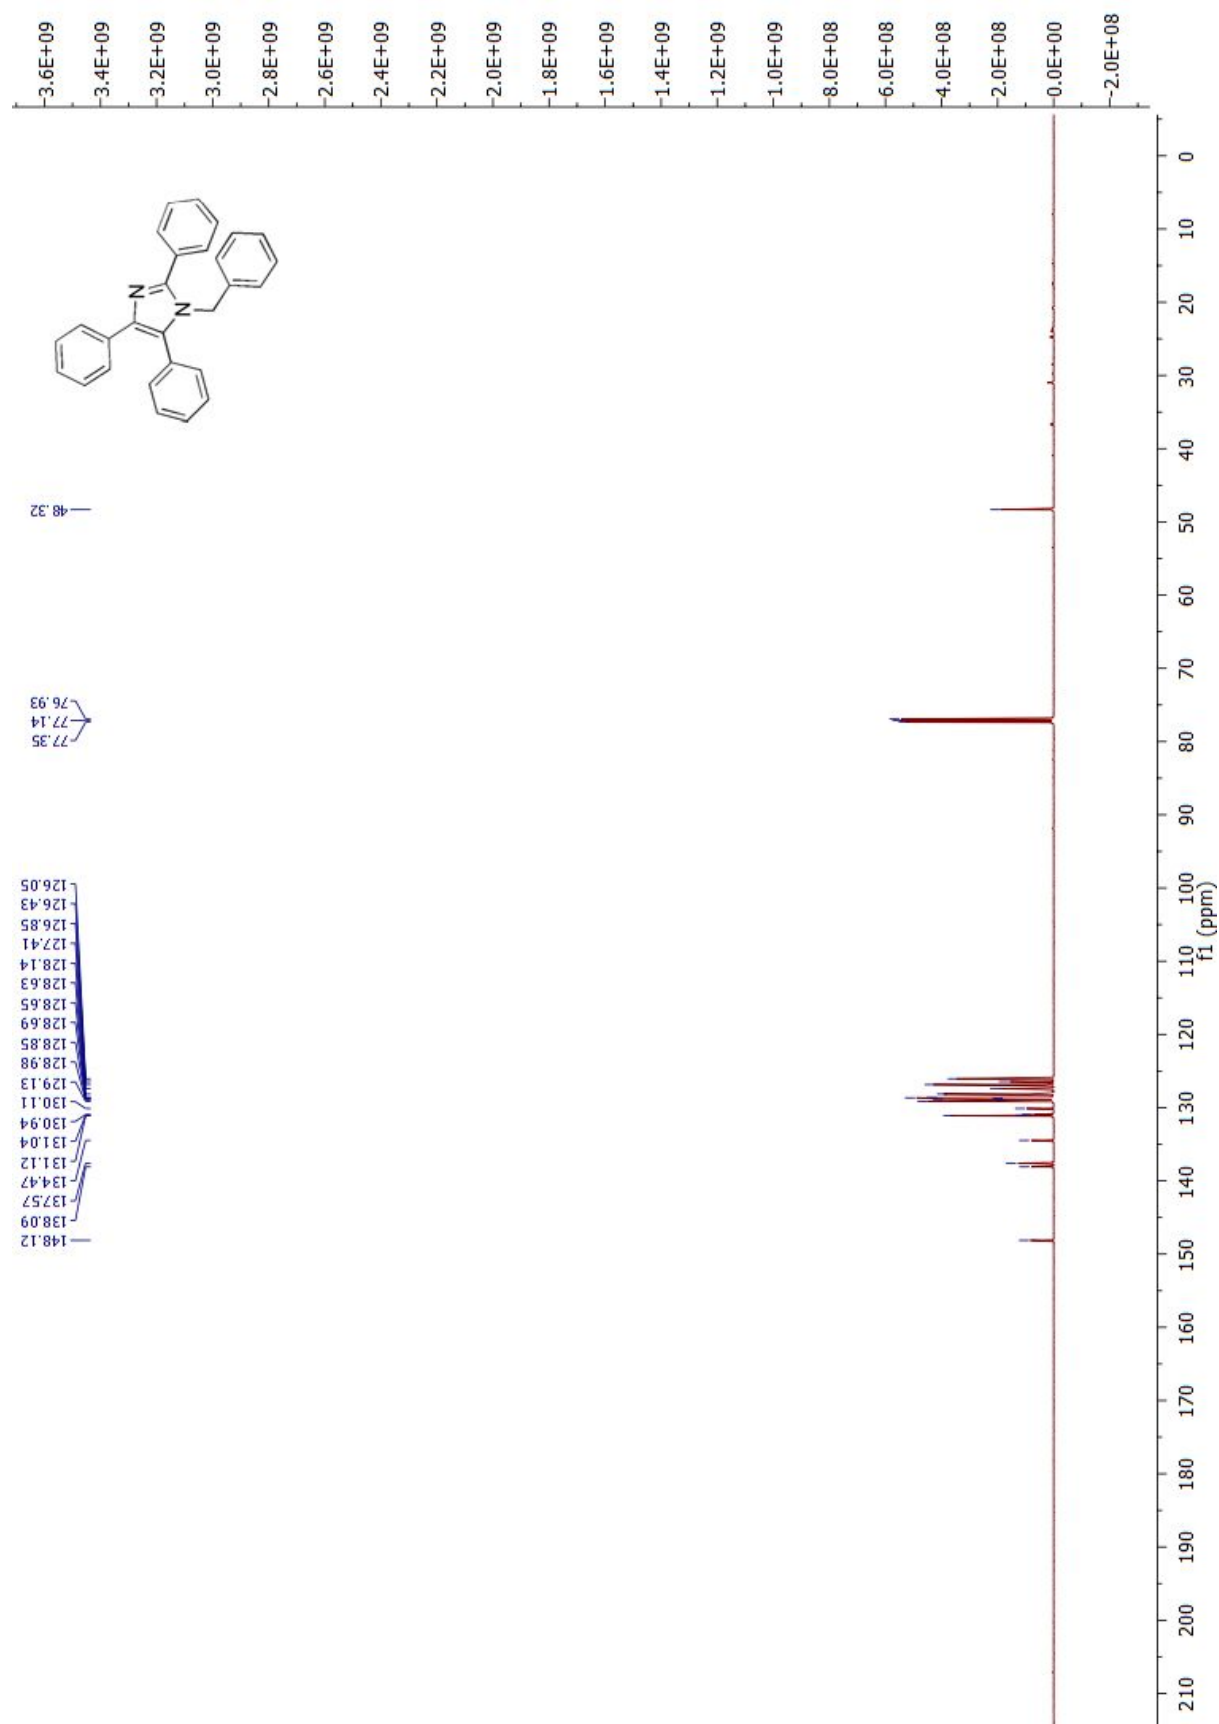

Figure S3:  $^1\text{H}$  NMR spectrum of 1-(4-Methyl-benzyl)-4,5-diphenyl-2-p-tolyl-1H-imidazole (3b) in  $\text{CDCl}_3$ .

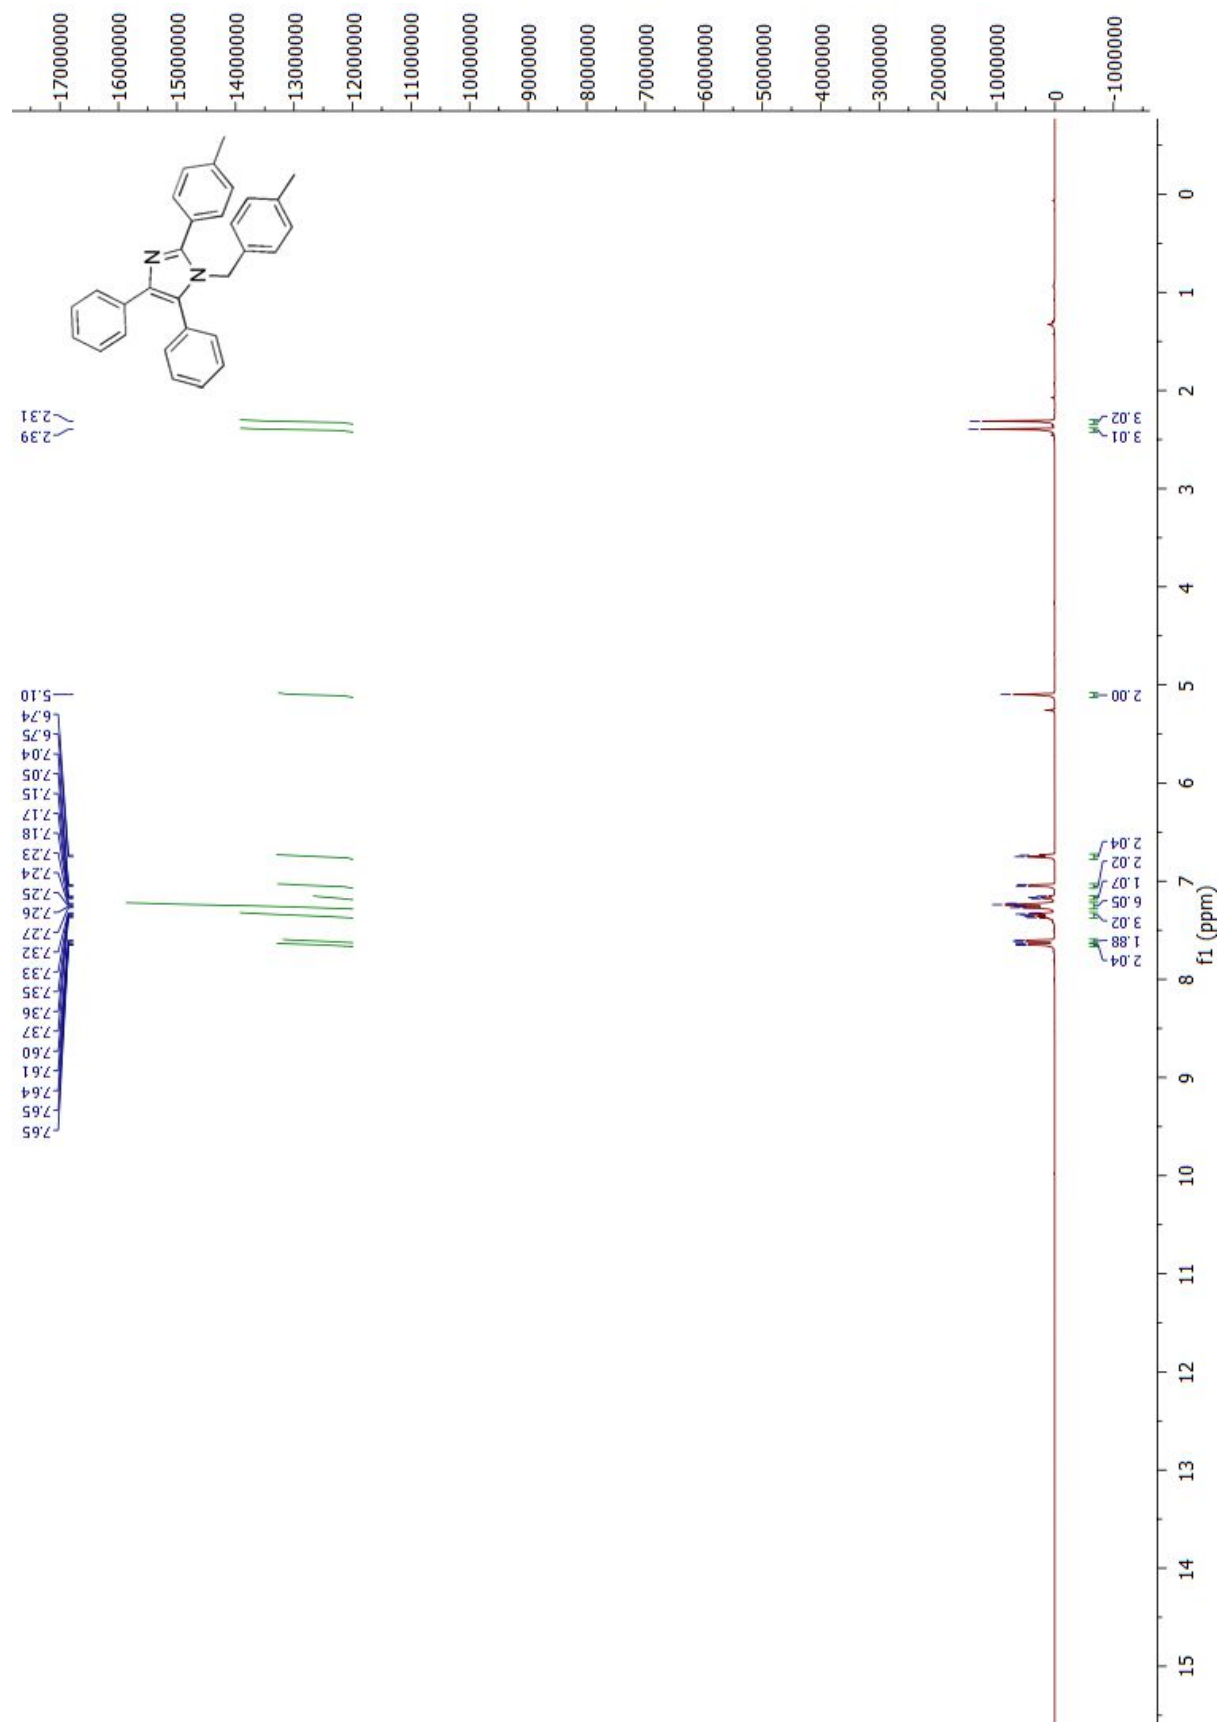

Figure S4:  $^{13}\text{C}$  NMR spectrum of 1-(4-Methyl-benzyl)-4,5-diphenyl-2-p-tolyl-1H-imidazole (3b) in  $\text{CDCl}_3$ .

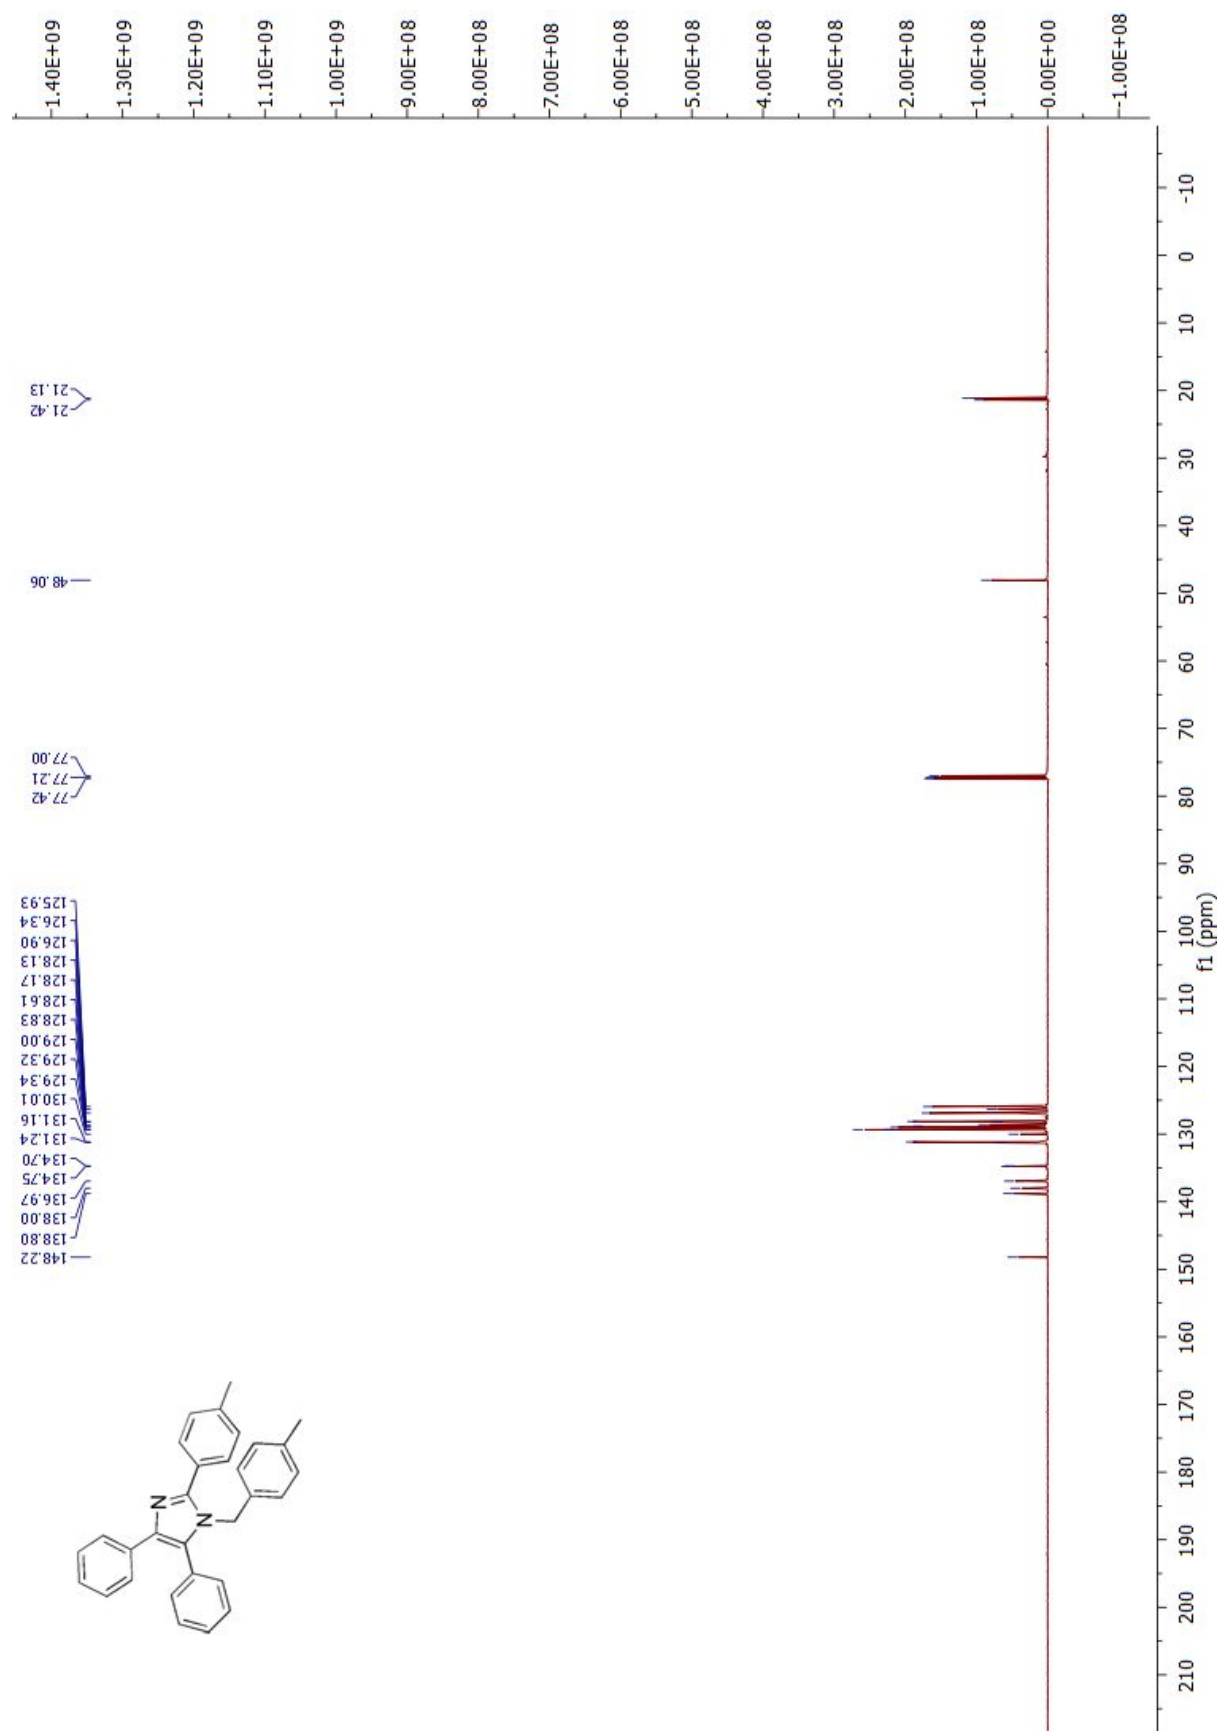

Figure S5:  $^1\text{H}$  NMR spectrum of 1-(4-tert-Butyl-benzyl)-2-(4-tert-butyl-phenyl)-4,5-diphenyl-1H-imidazole (3c) in  $\text{DMSO-d}_6$ .

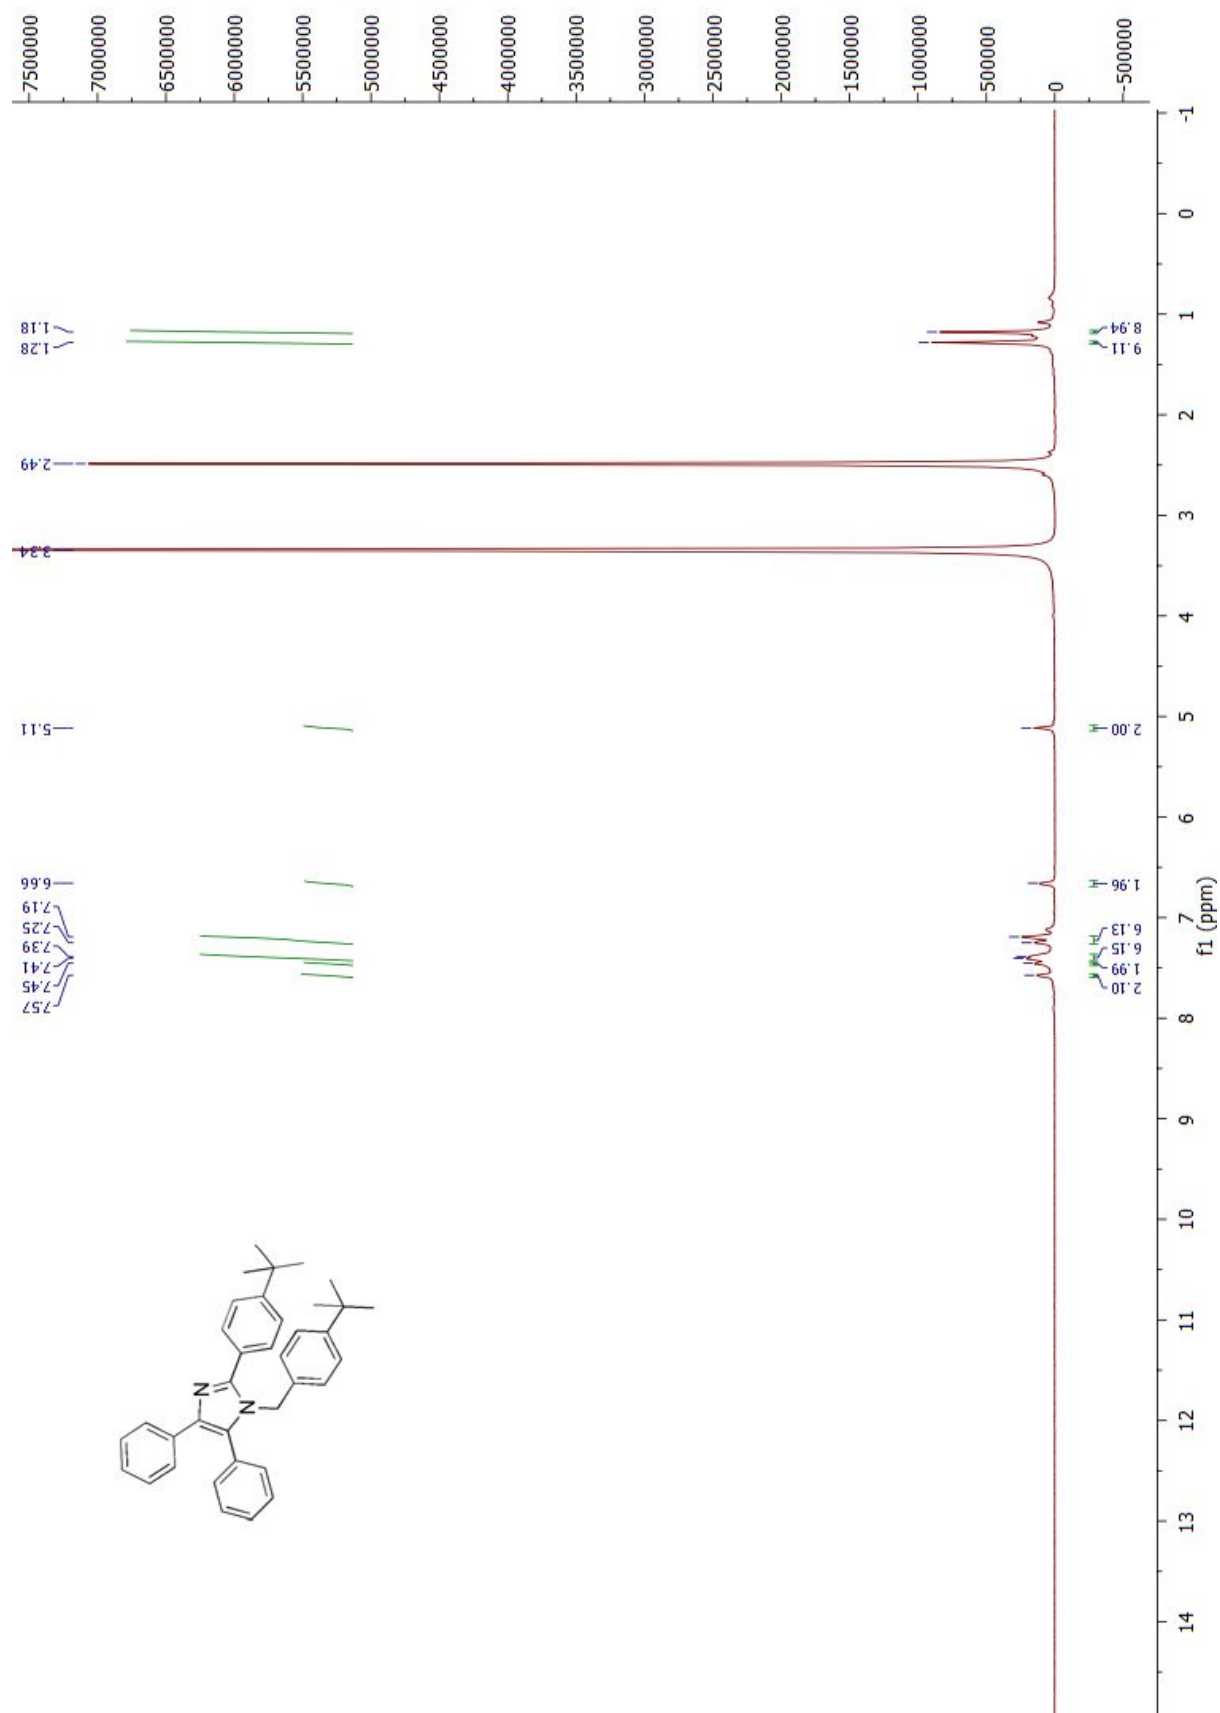

Figure S6:  $^{13}\text{C}$  NMR spectrum of 1-(4-tert-Butyl-benzyl)-2-(4-tert-butyl-phenyl)-4,5-diphenyl-1H-imidazole (3c) in  $\text{CDCl}_3$ .

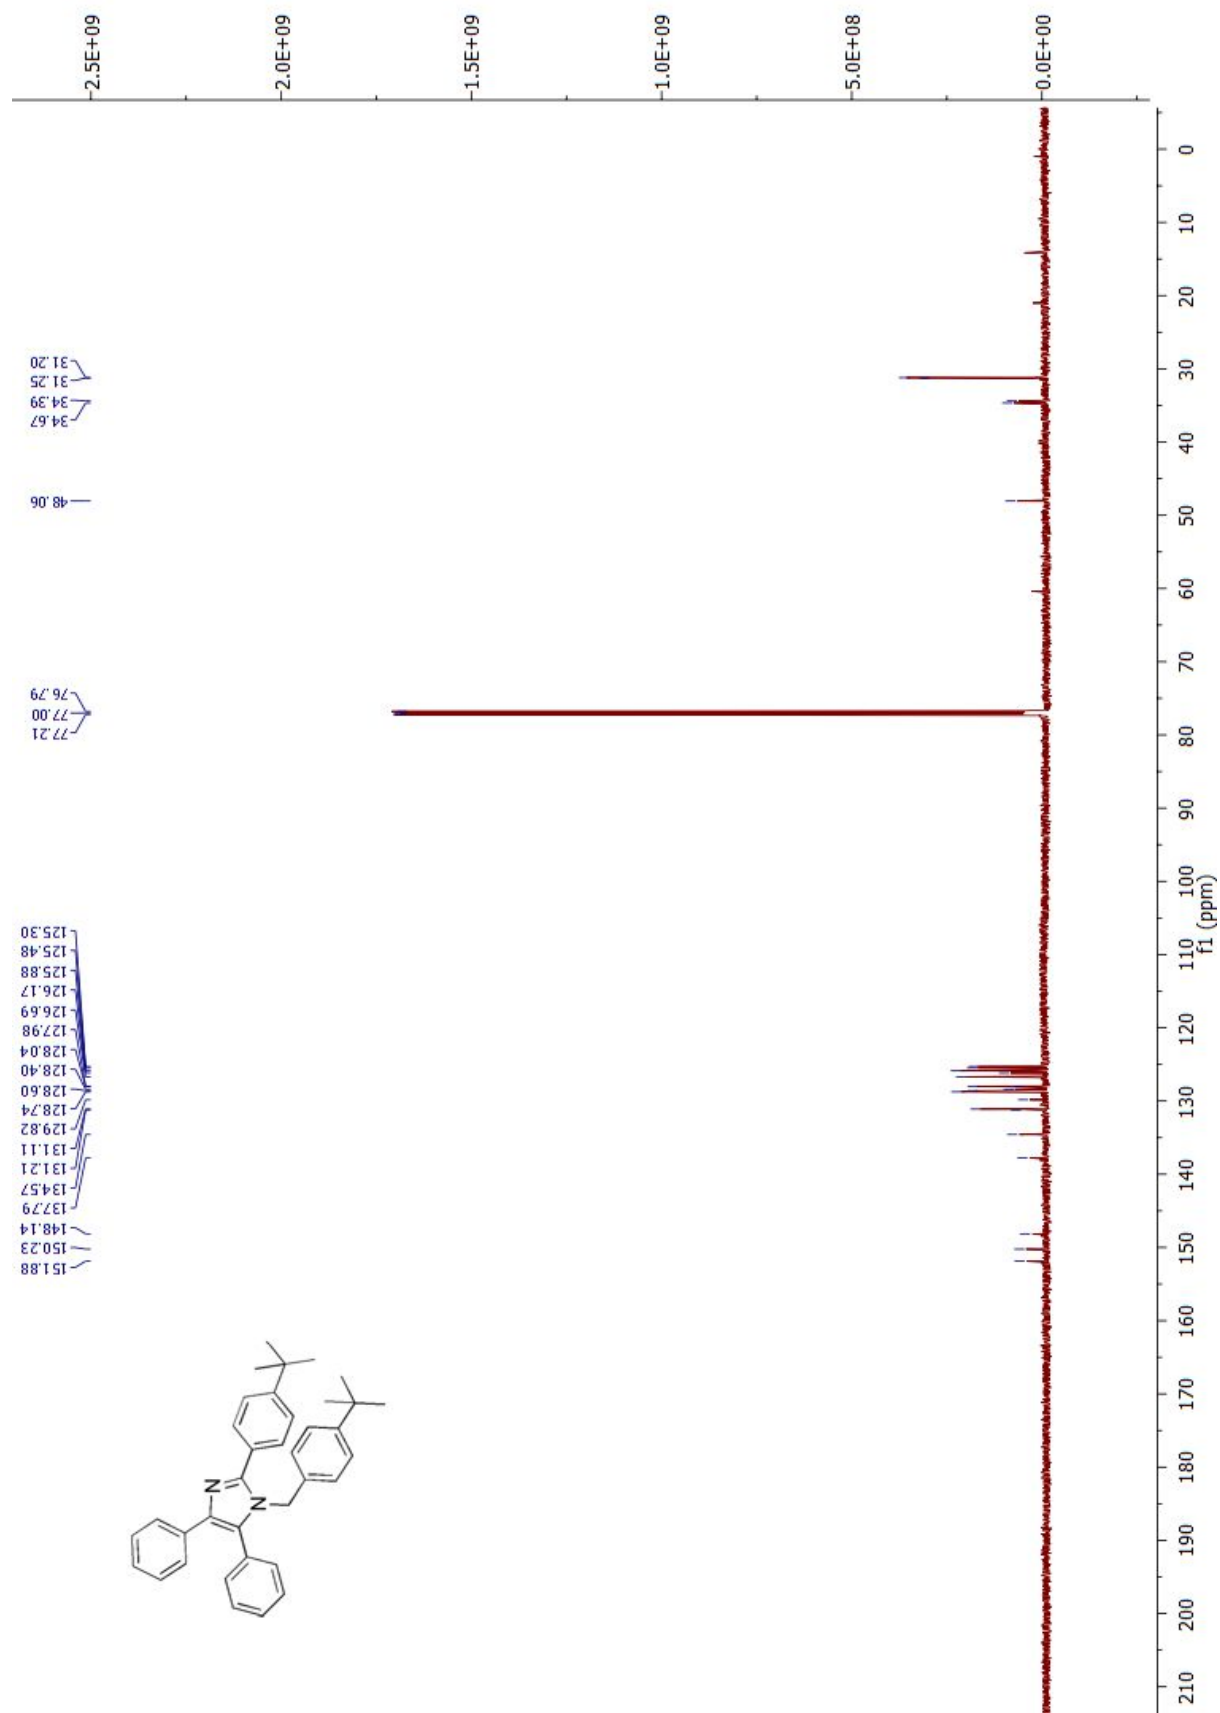



Figure S7:  $^1\text{H}$  NMR spectrum of 1-(4-Fluoro-benzyl)-2-(4-fluoro-phenyl)-4,5-diphenyl-1H-imidazole (3d) in  $\text{DMSO-d}_6$ .

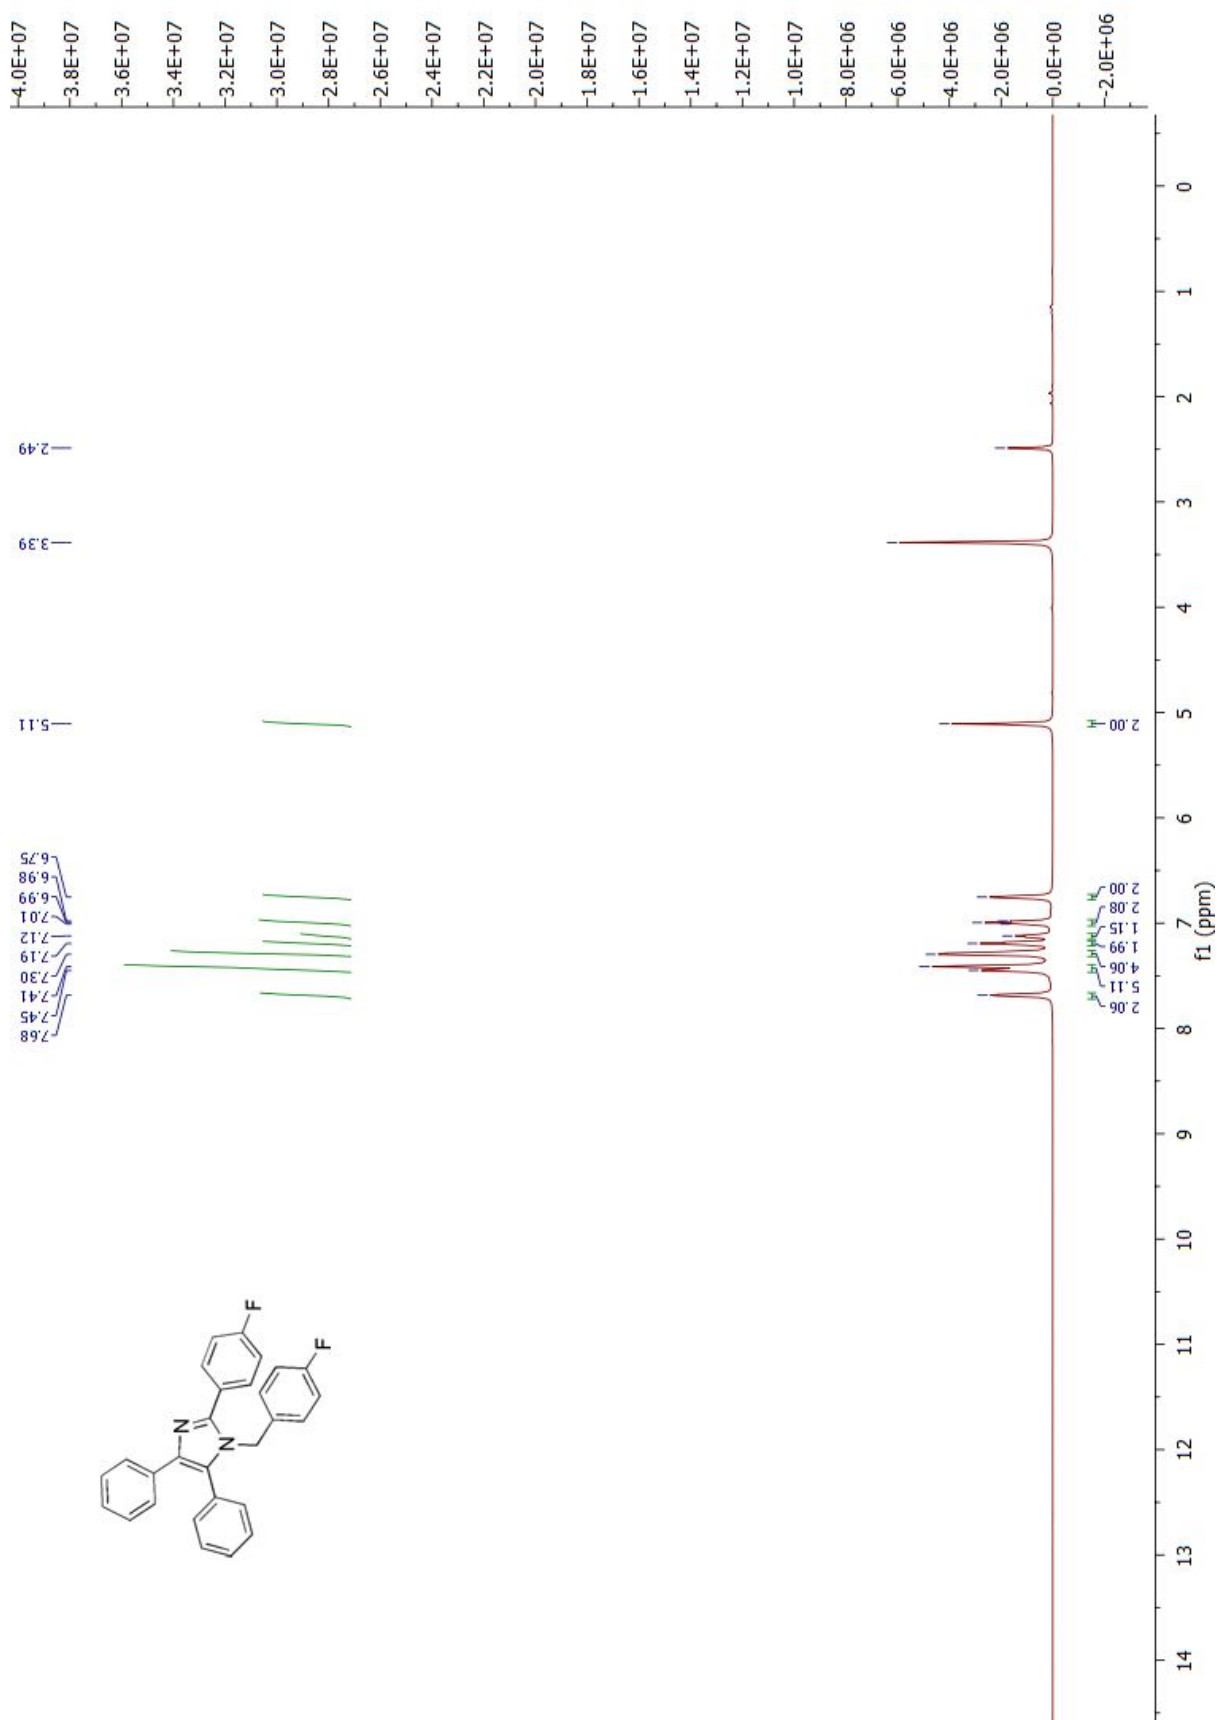

**Figure S8:**  $^{13}\text{C}$  NMR spectrum of 1-(4-Fluoro-benzyl)-2-(4-fluoro-phenyl)-4,5-diphenyl-1H-imidazole (3d) in  $\text{DMSO-d}_6$ .

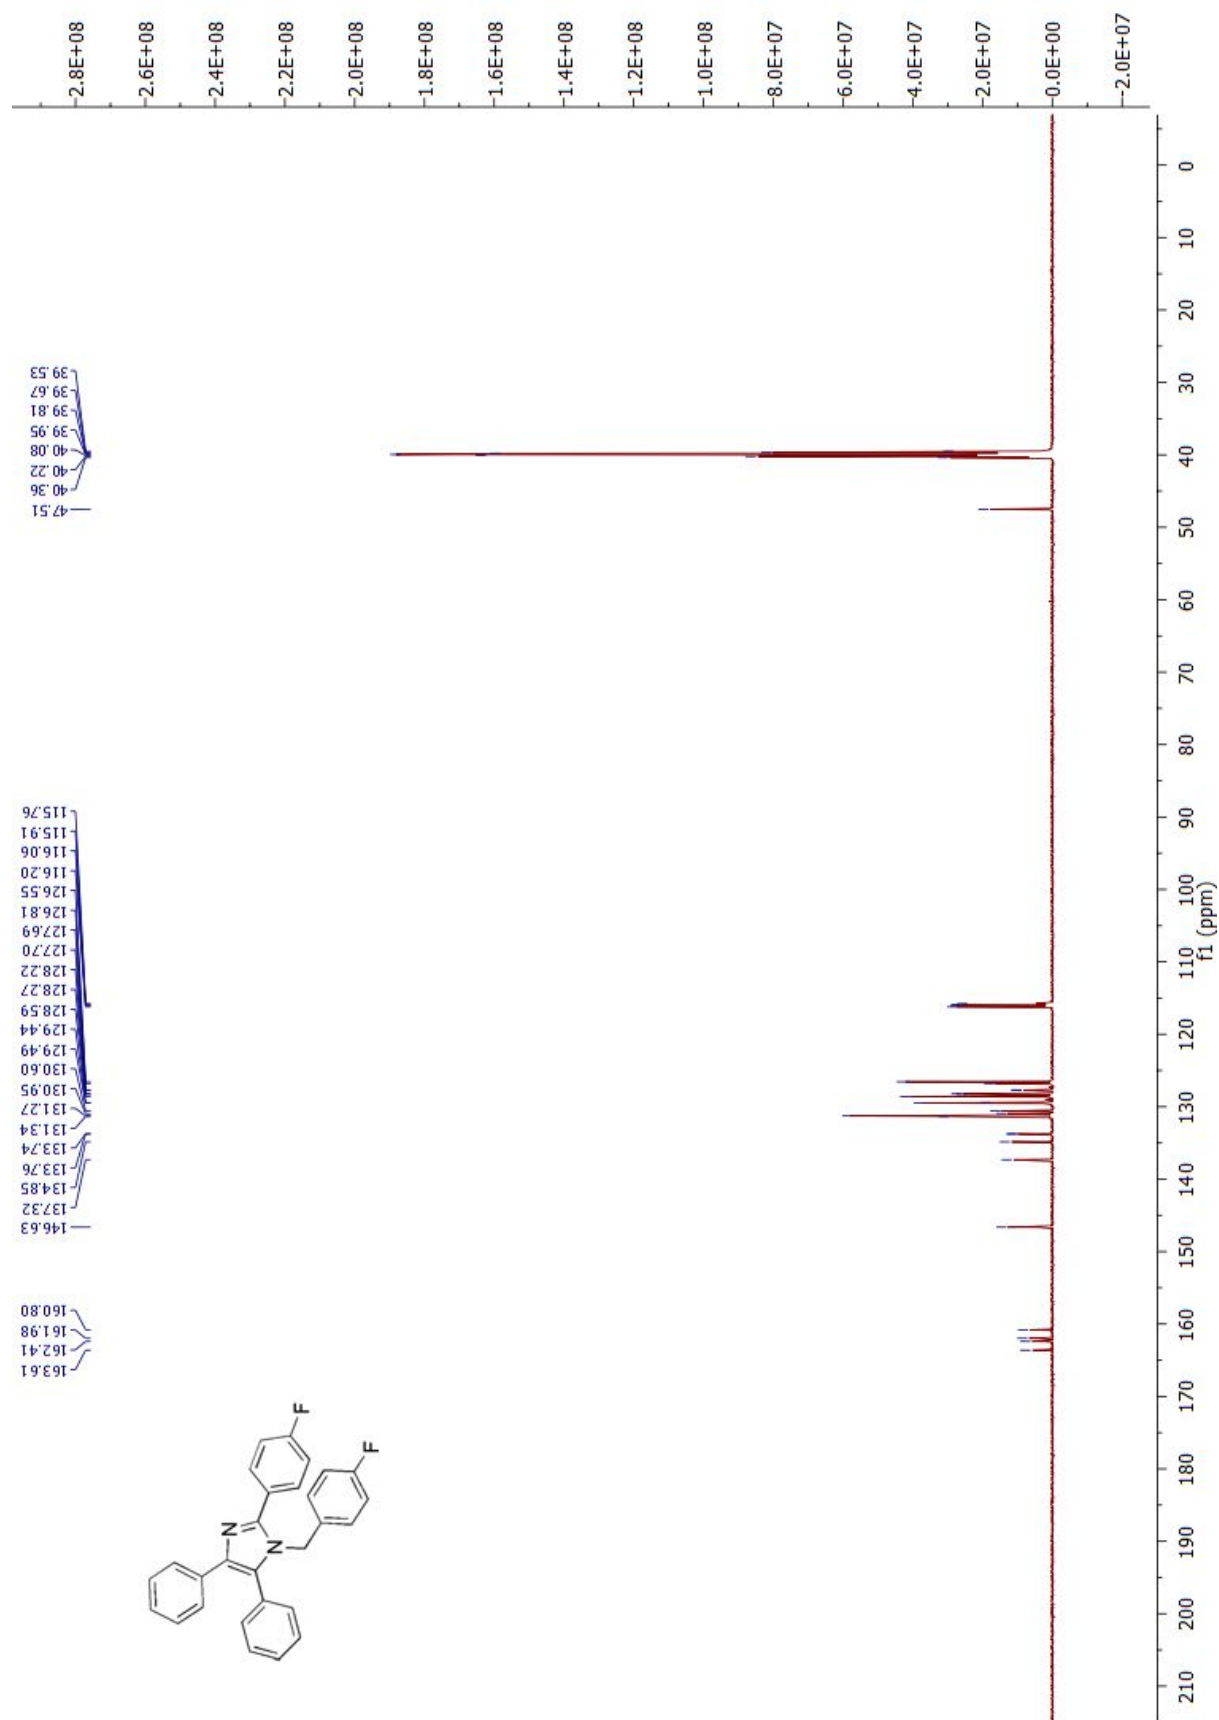

Figure S9:  $^1\text{H}$  NMR spectrum of 1-(4-Bromo-benzyl)-2-(4-bromo-phenyl)-4,5-diphenyl-1H-imidazole (3e) in  $\text{CDCl}_3$ .

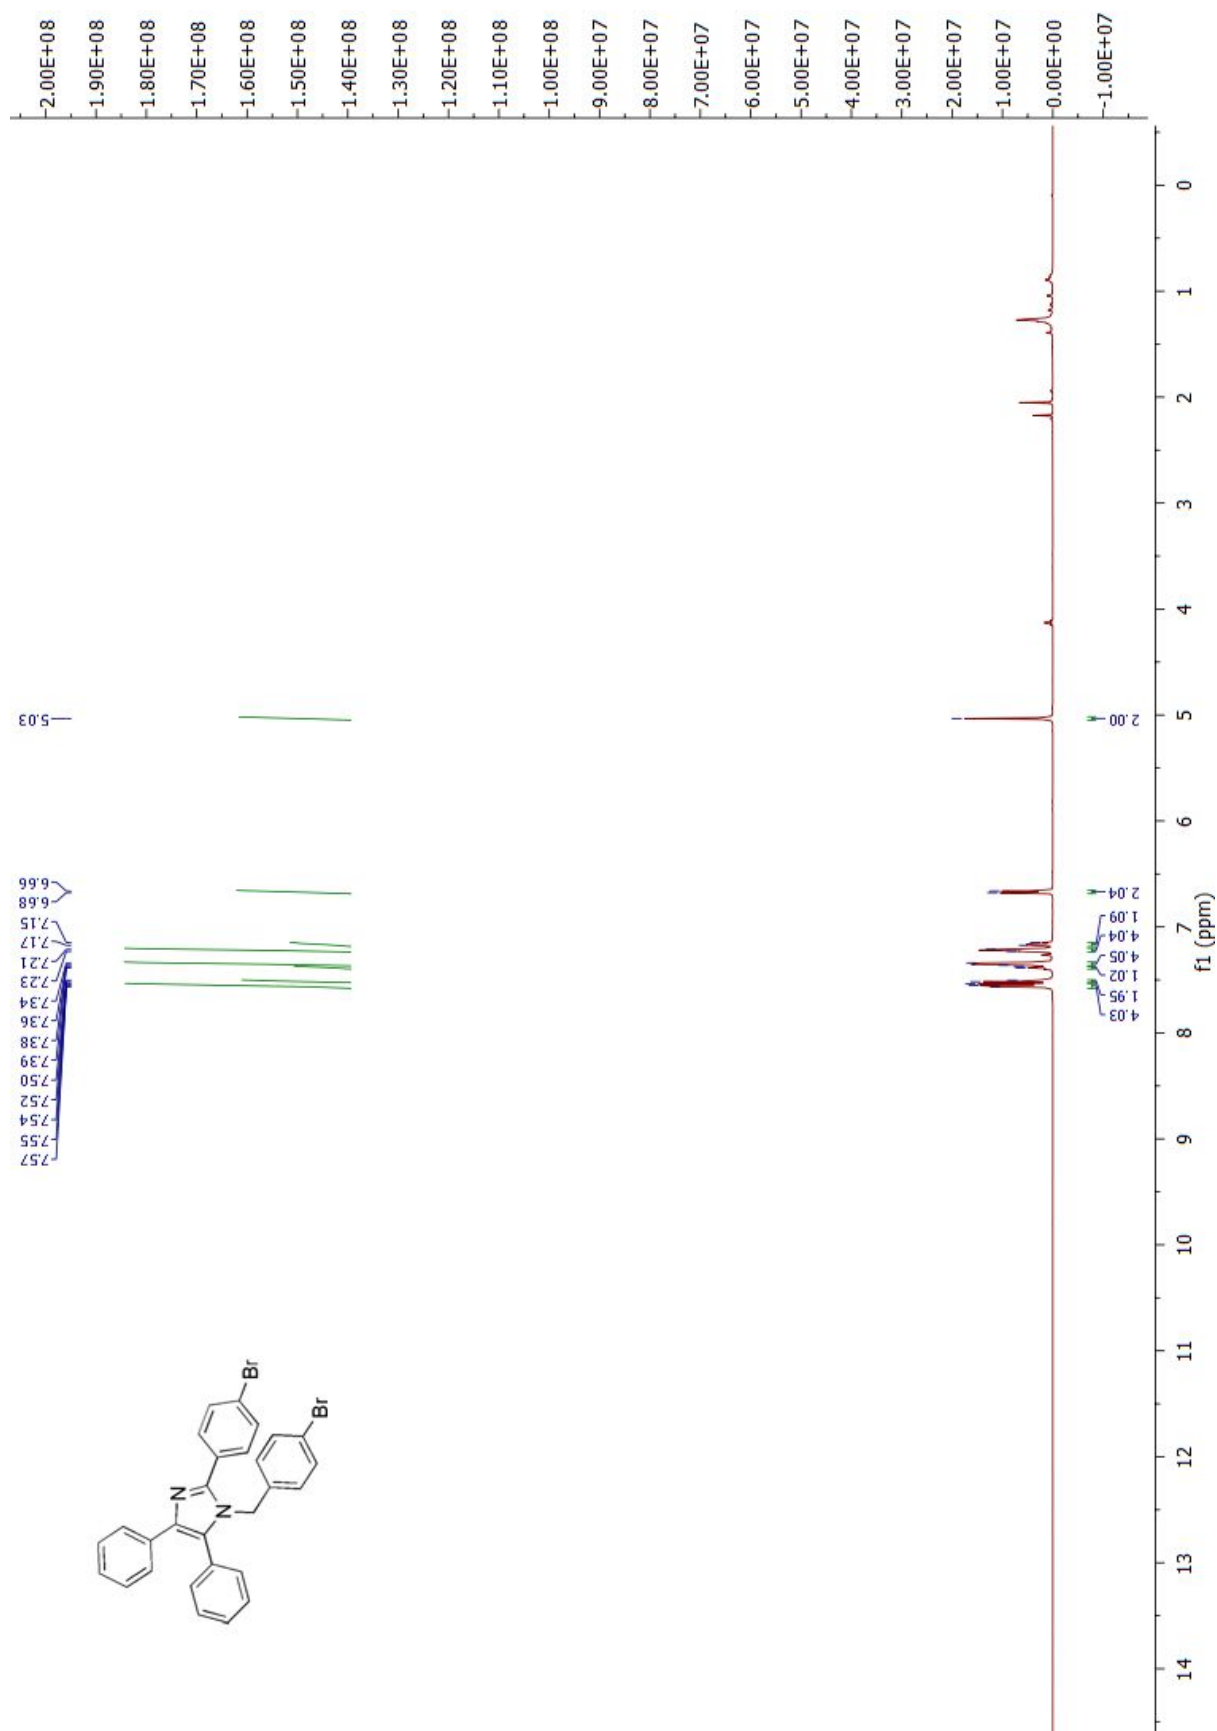

Figure S10:  $^{13}\text{C}$  NMR spectrum of 1-(4-Bromo-benzyl)-2-(4-bromo-phenyl)-4,5-diphenyl-1H-imidazole (3e) in  $\text{CDCl}_3$ .

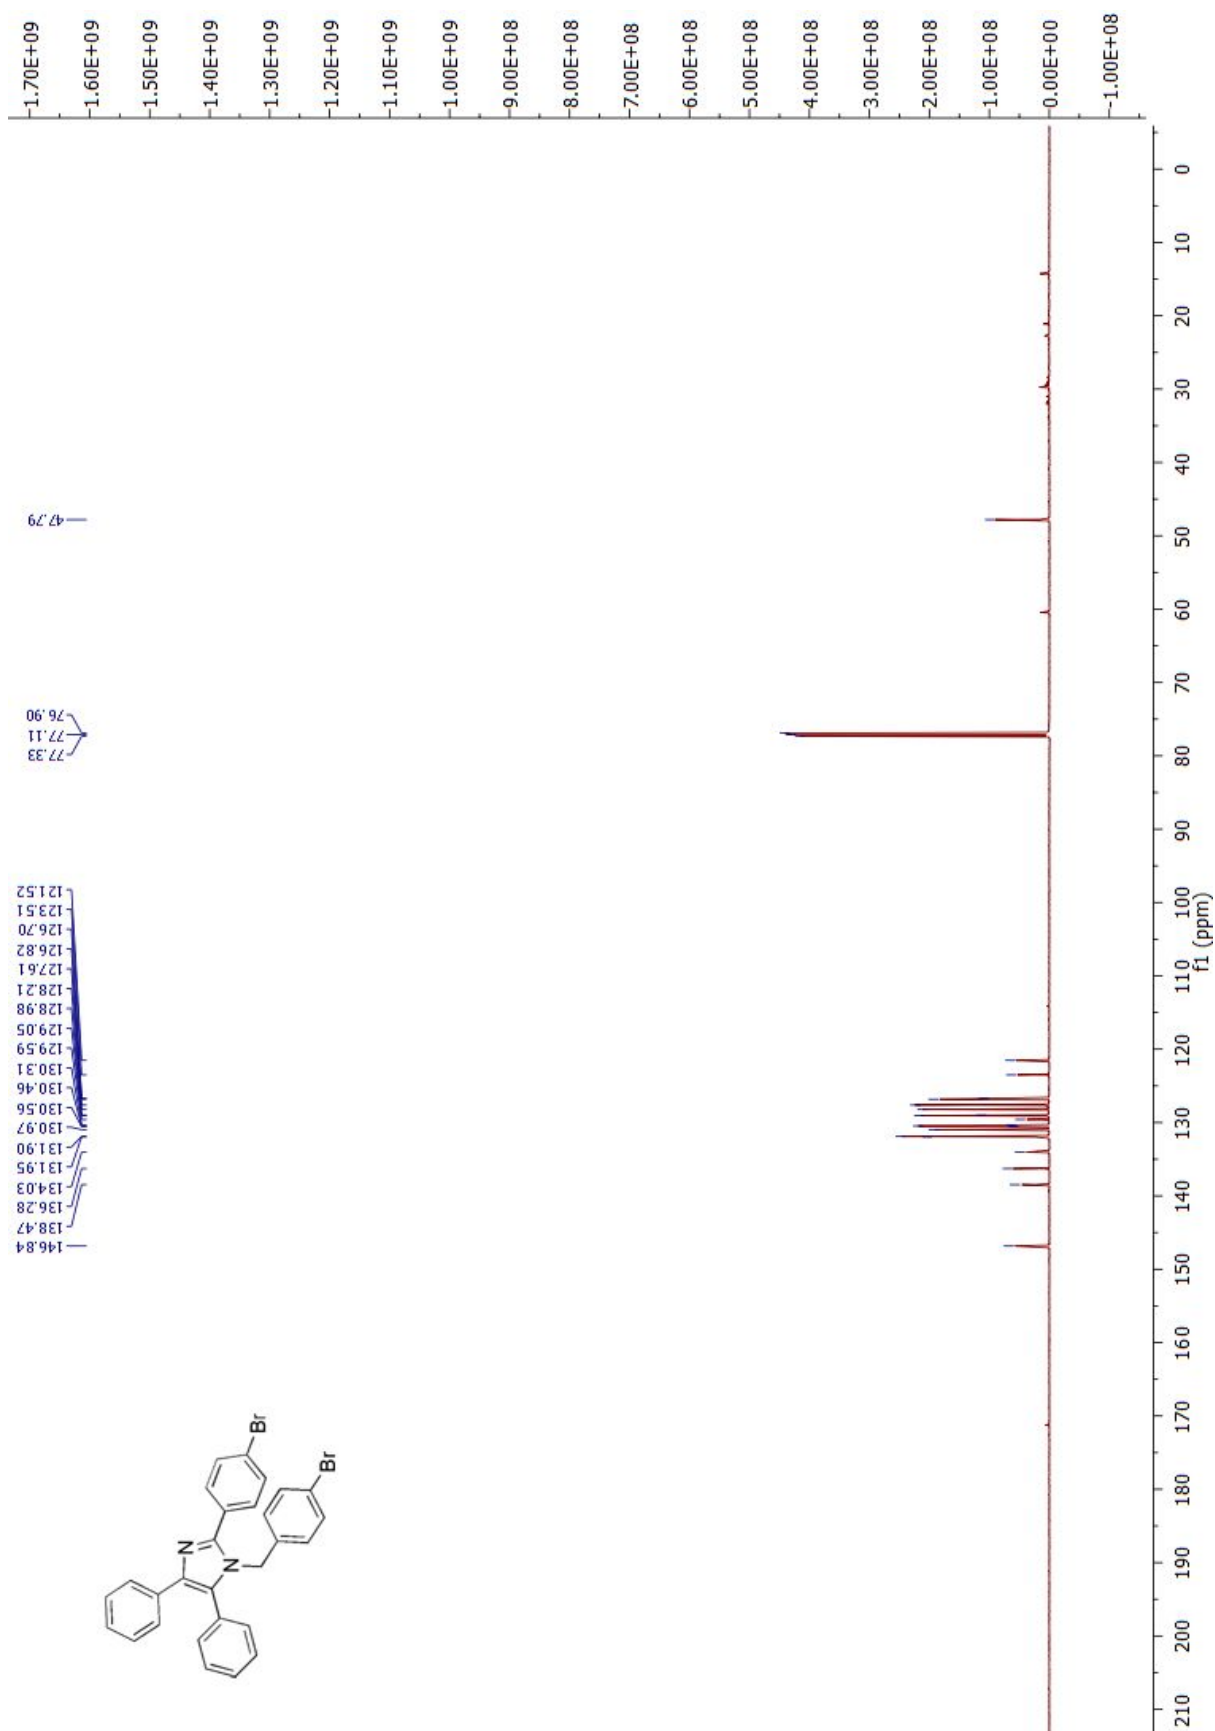

Figure S11:  $^1\text{H}$  NMR spectrum of 1-(4-Chloro-benzyl)-2-(4-chloro-phenyl)-4,5-diphenyl-1H-imidazole (3f) in  $\text{CDCl}_3$ .

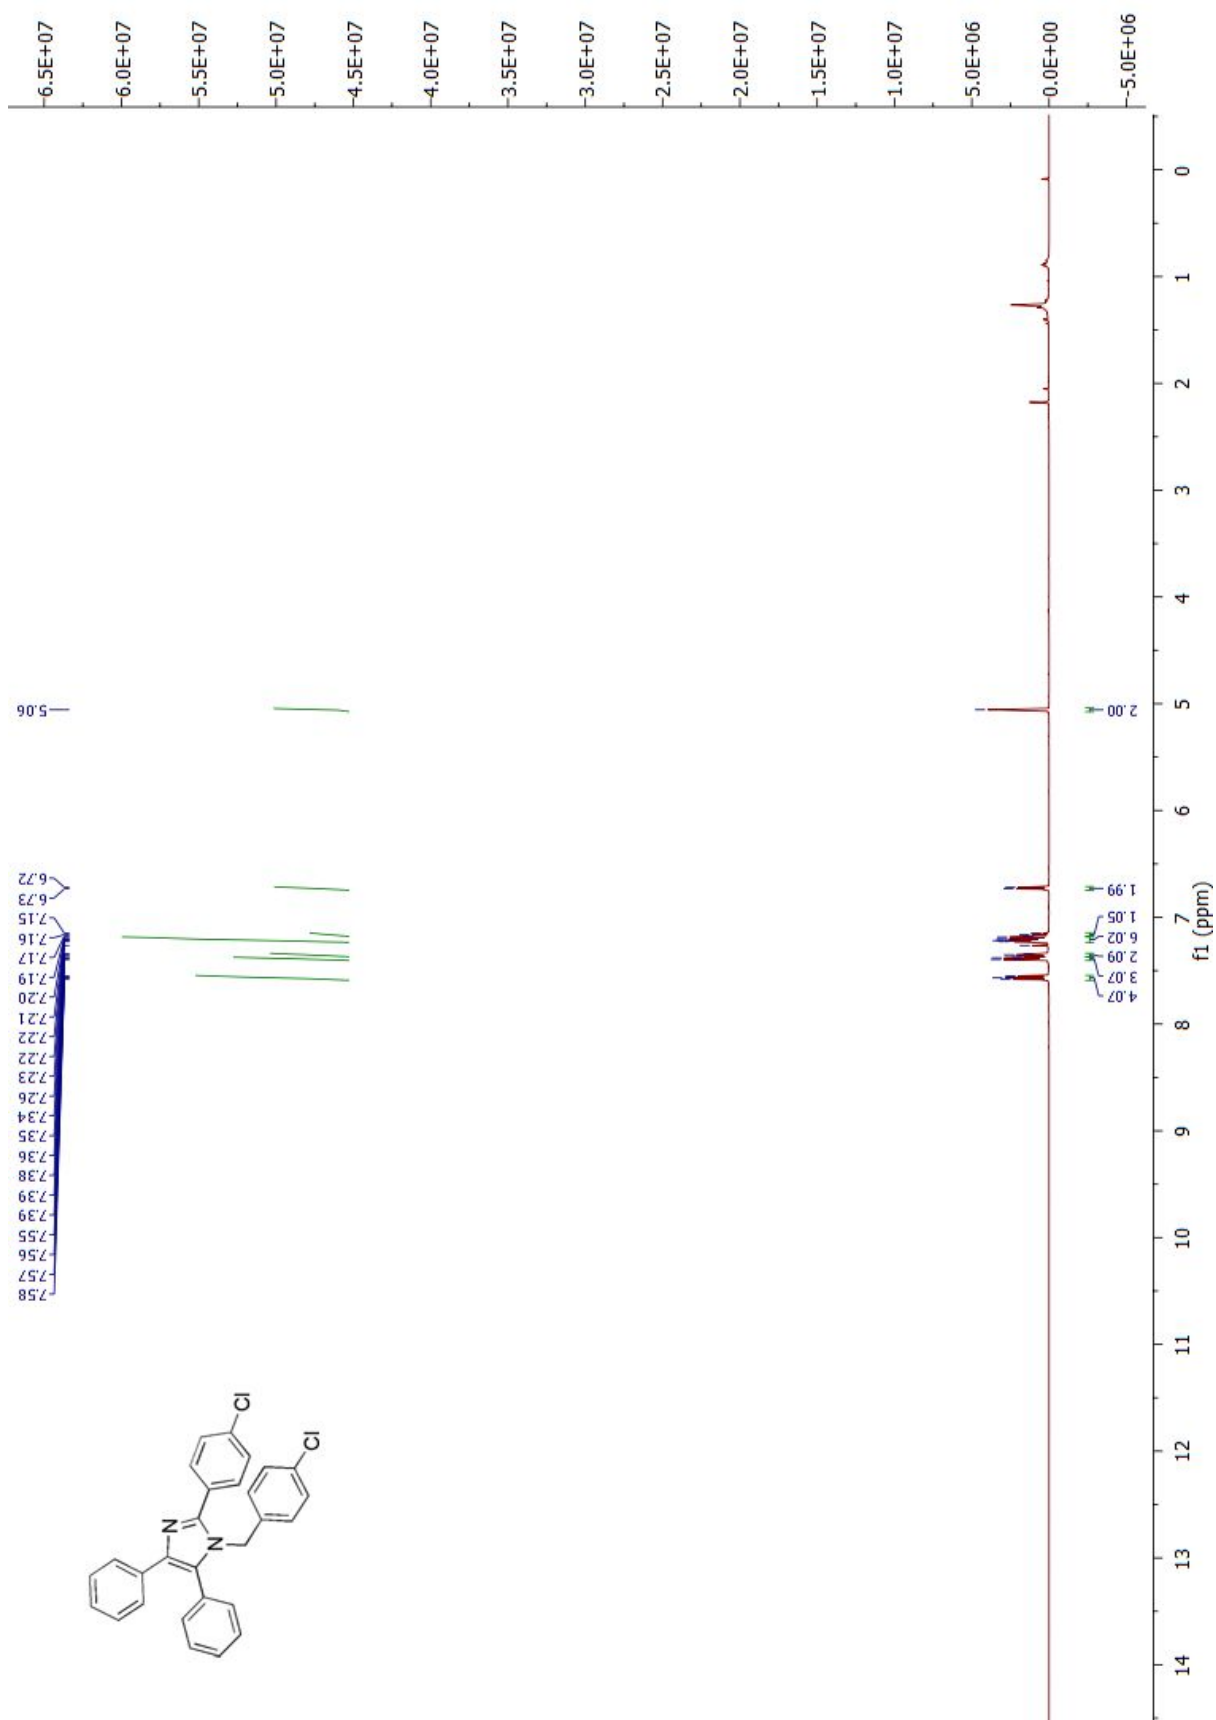

Figure S12:  $^{13}\text{C}$ NMR spectra of 1-(4-Chloro-benzyl)-2-(4-chloro-phenyl)-4,5-diphenyl-1H-imidazole (3f) in  $\text{CDCl}_3$ .

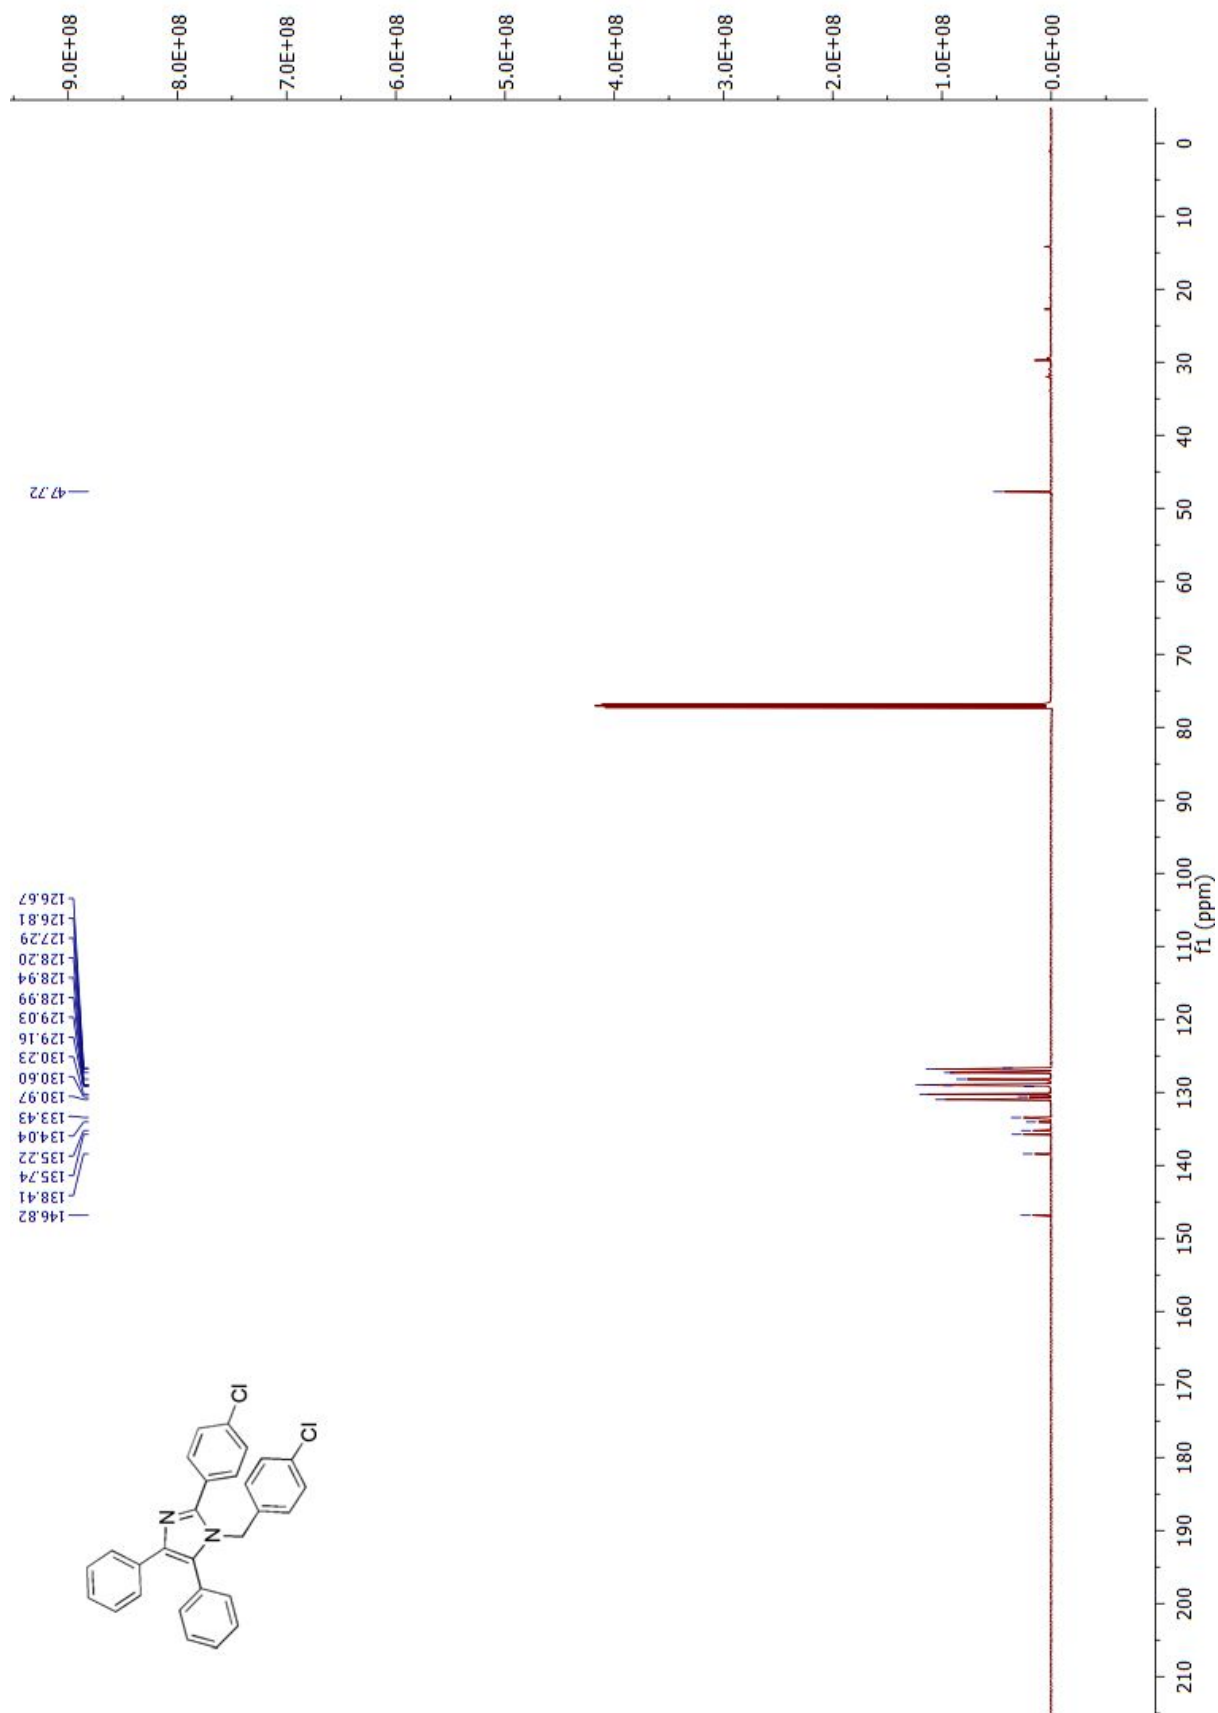

**Figure S13:**  $^1\text{H}$  NMR spectrum of 4,5-Diphenyl-1-(4-trifluoromethyl-benzyl)-2-(4-trifluoromethyl-phenyl)-1H-imidazole (**3g**) in  $\text{CDCl}_3$ .

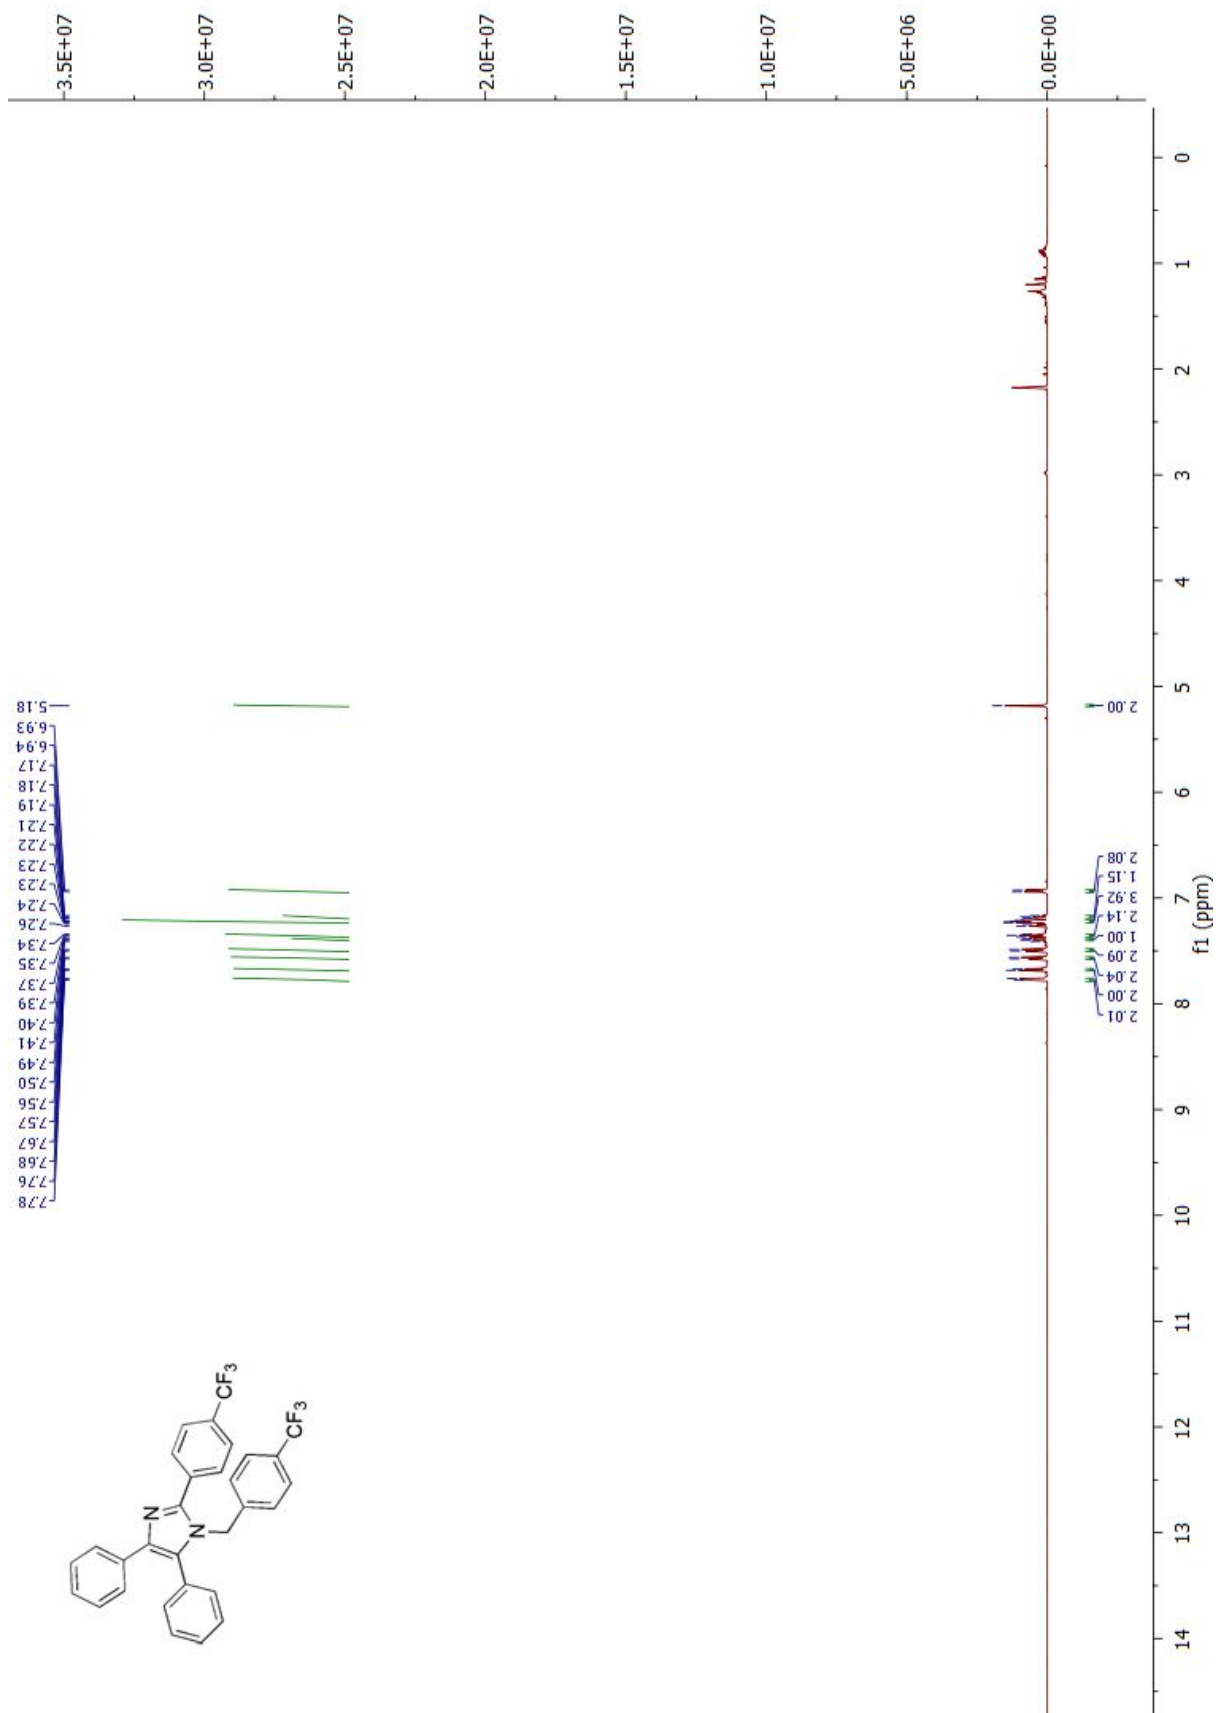

Figure S14:  $^{13}\text{C}$  NMR spectrum of 4,5-Diphenyl-1-(4-trifluoromethyl-benzyl)-2-(4-trifluoromethyl-phenyl)-1H-imidazole (3g) in  $\text{CDCl}_3$ .

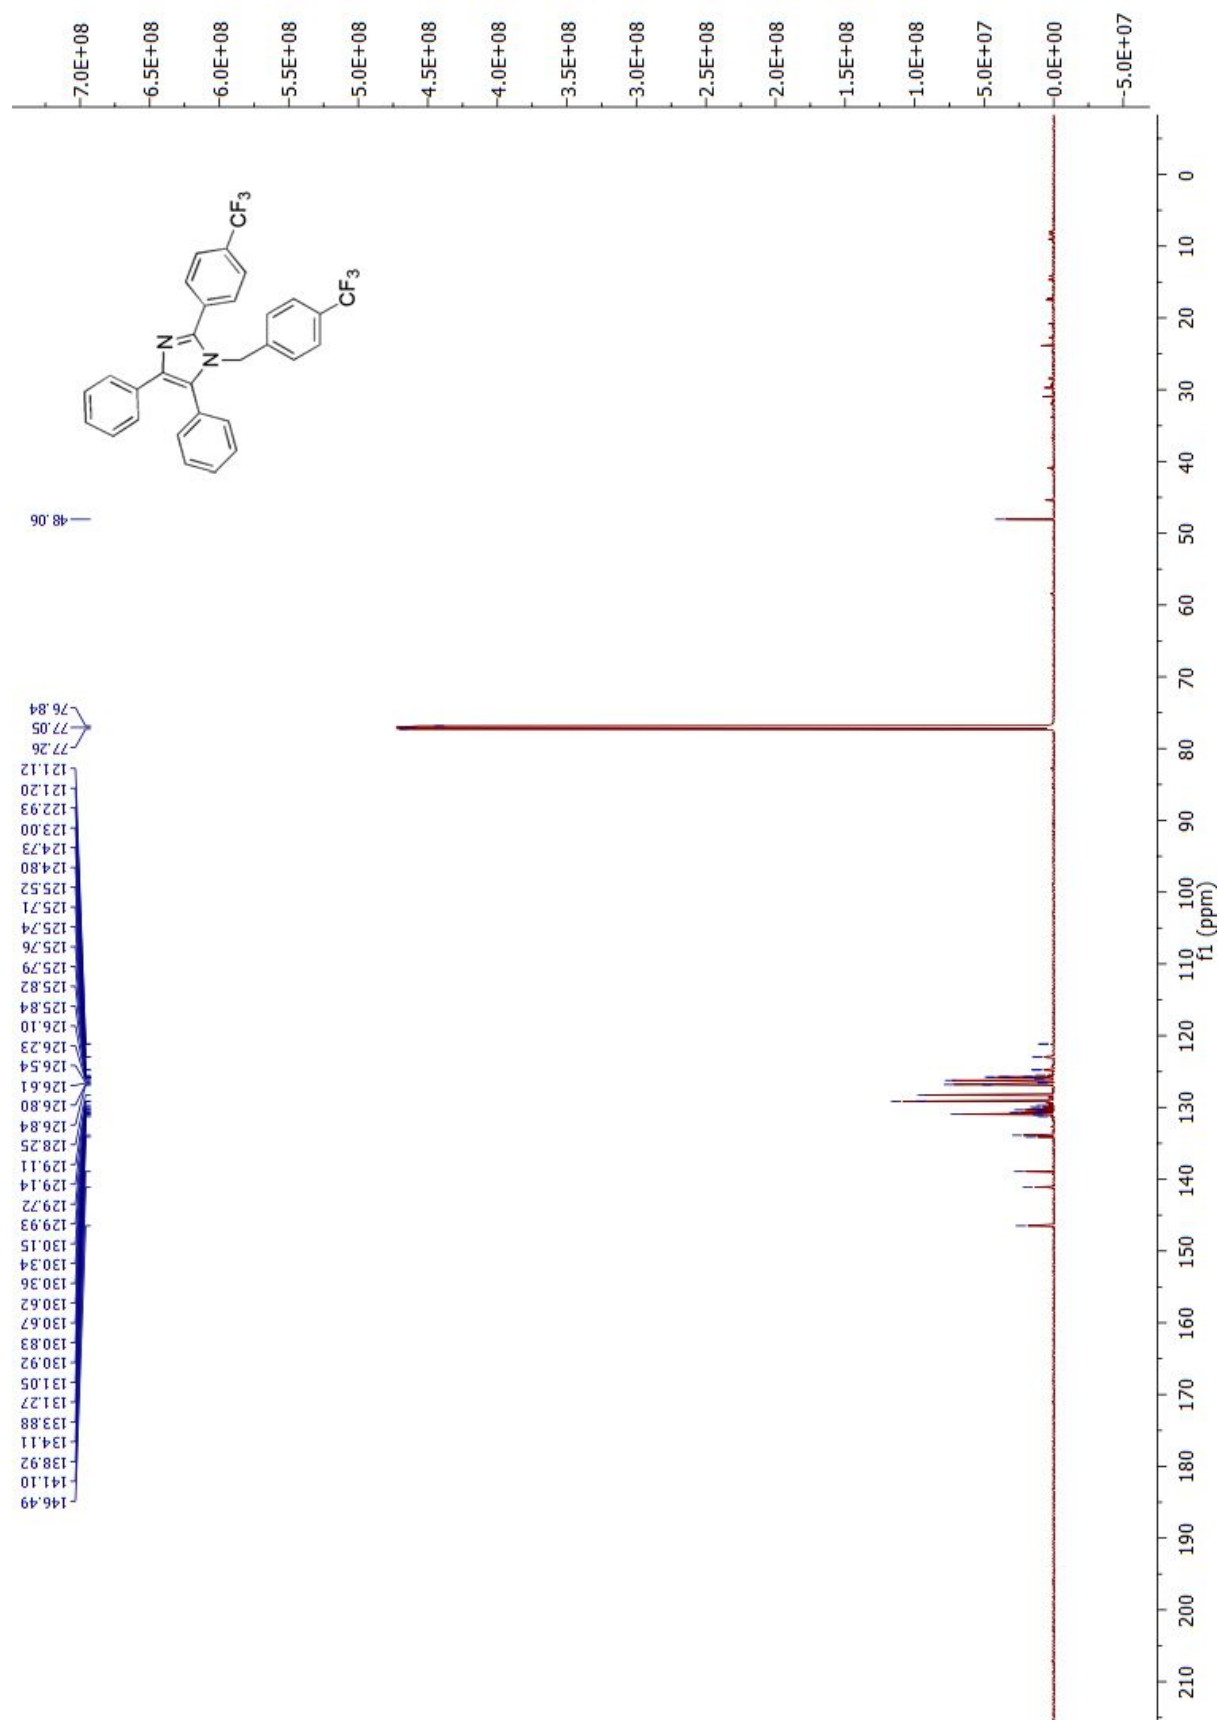



Figure S15:  $^1\text{H}$  NMR spectrum of 4,5-Diphenyl-1-(4-trifluoromethoxy-benzyl)-2-(4-trifluoromethoxy-phenyl)-1H-imidazole (3h) in  $\text{CDCl}_3$ .

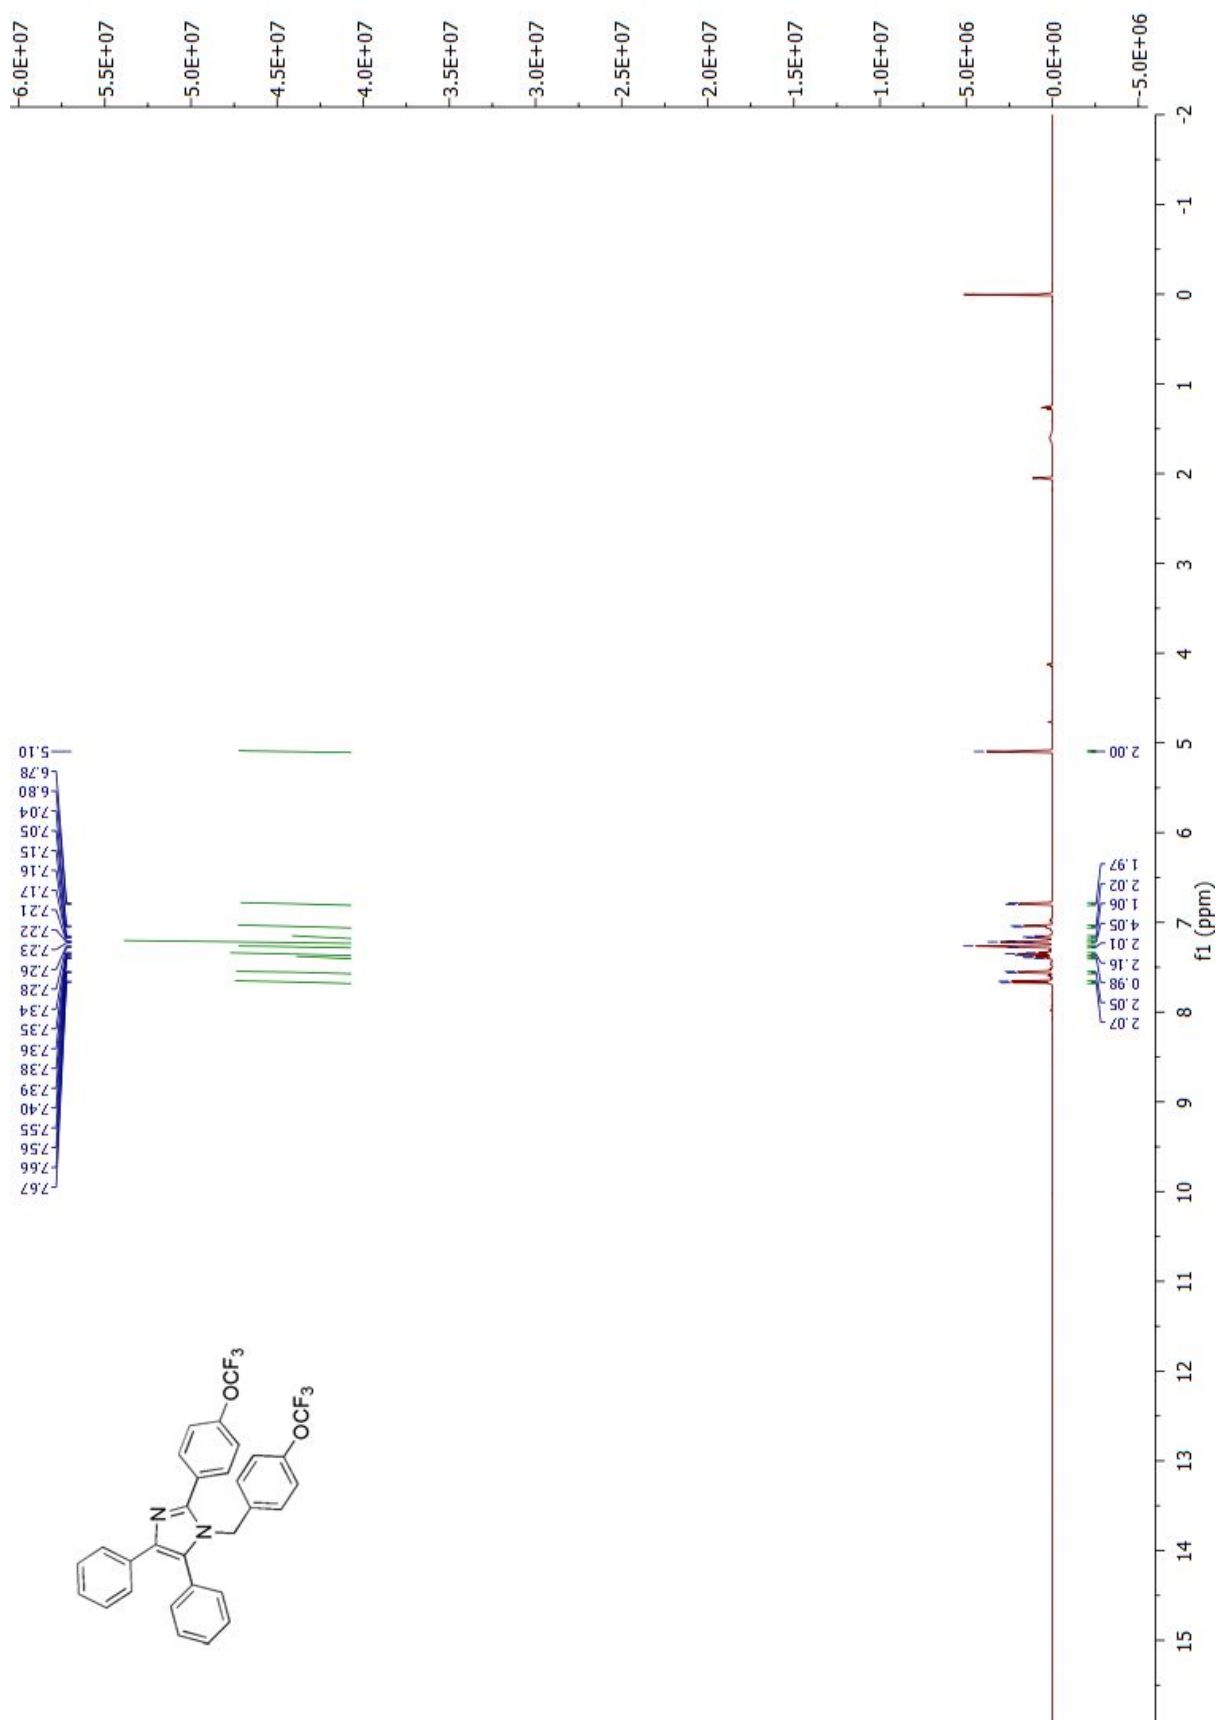

Figure S16:  $^{13}\text{C}$ NMR spectrum of 4,5-Diphenyl-1-(4-trifluoromethoxy-benzyl)-2-(4-trifluoromethoxy-phenyl)-1H-imidazole (3h) in  $\text{CDCl}_3$ .

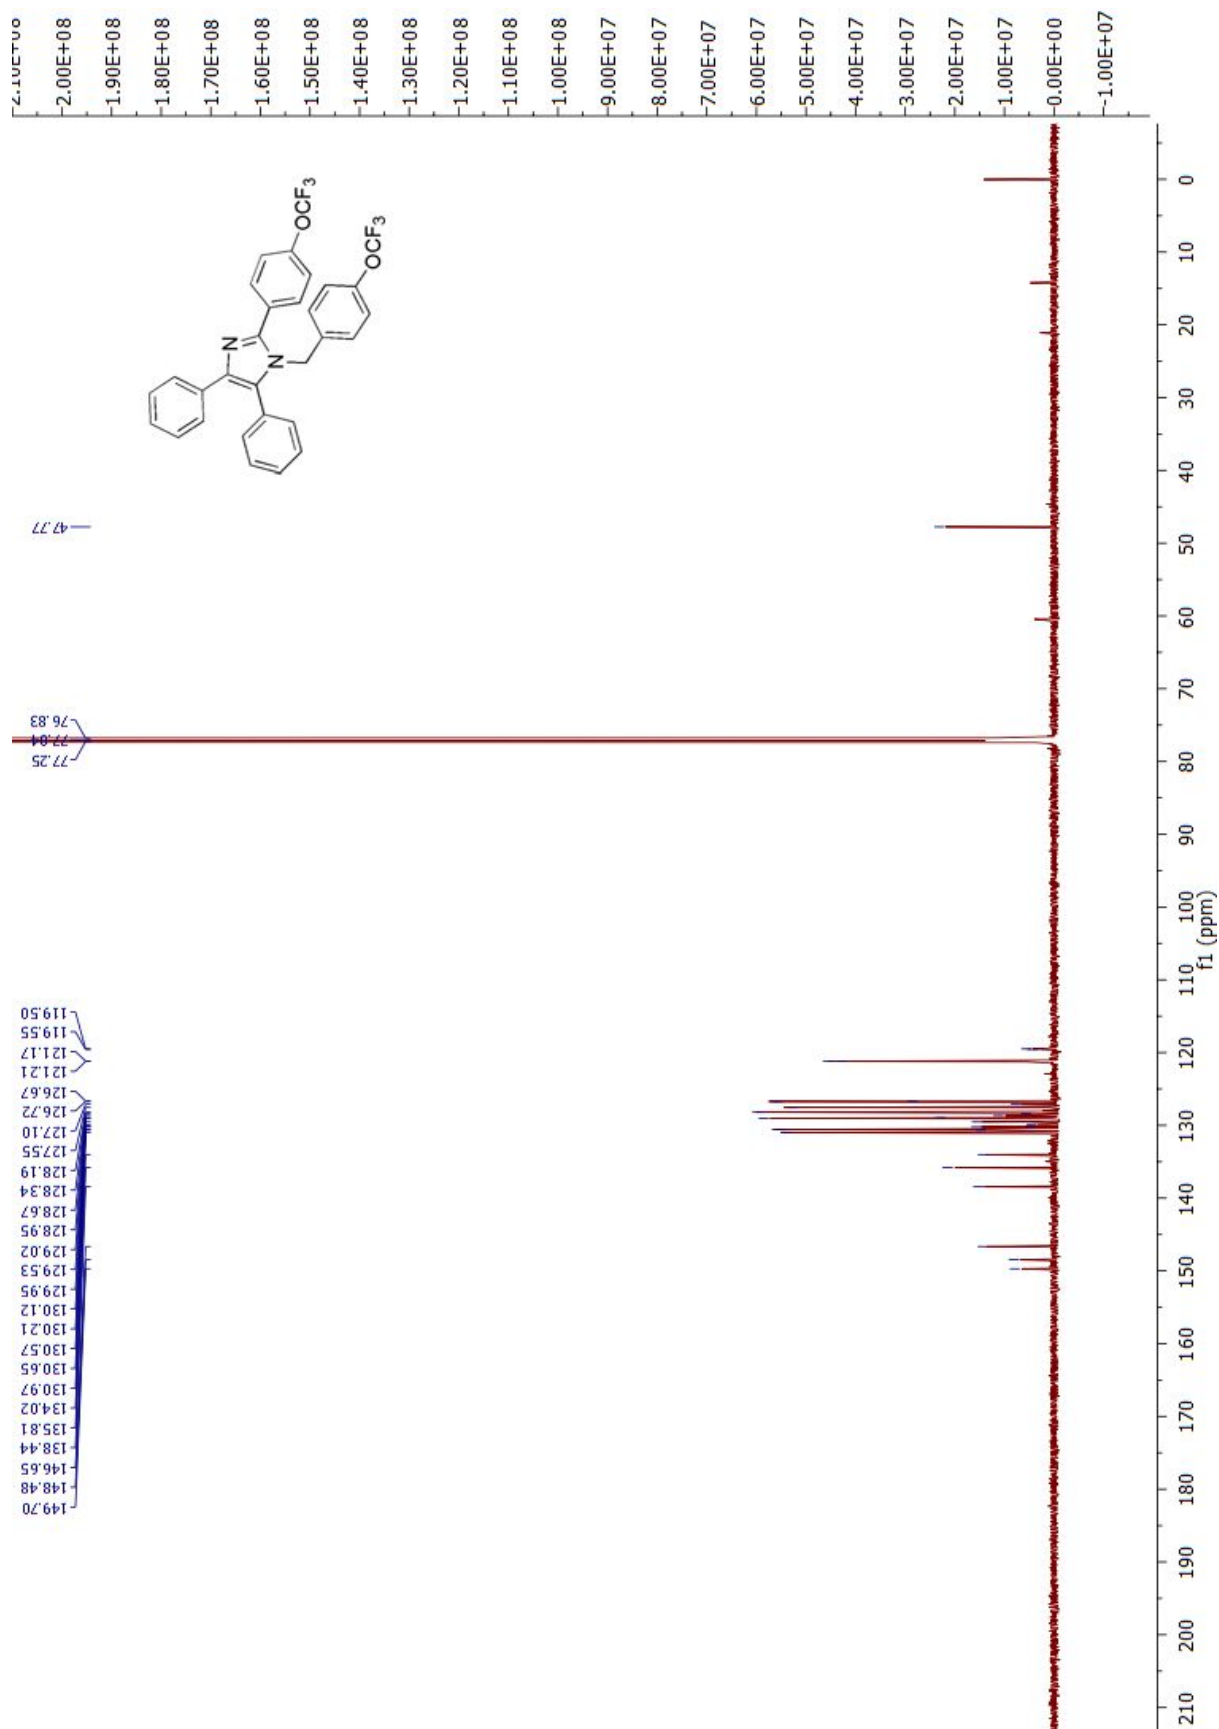

**Figure S17:**  $^1\text{H}$  NMR spectrum of 2-(4,5-diphenyl-1-(pyridin-2-ylmethyl)-1H-imidazol-2-yl)pyridine (**3i**) in  $\text{CDCl}_3$ .

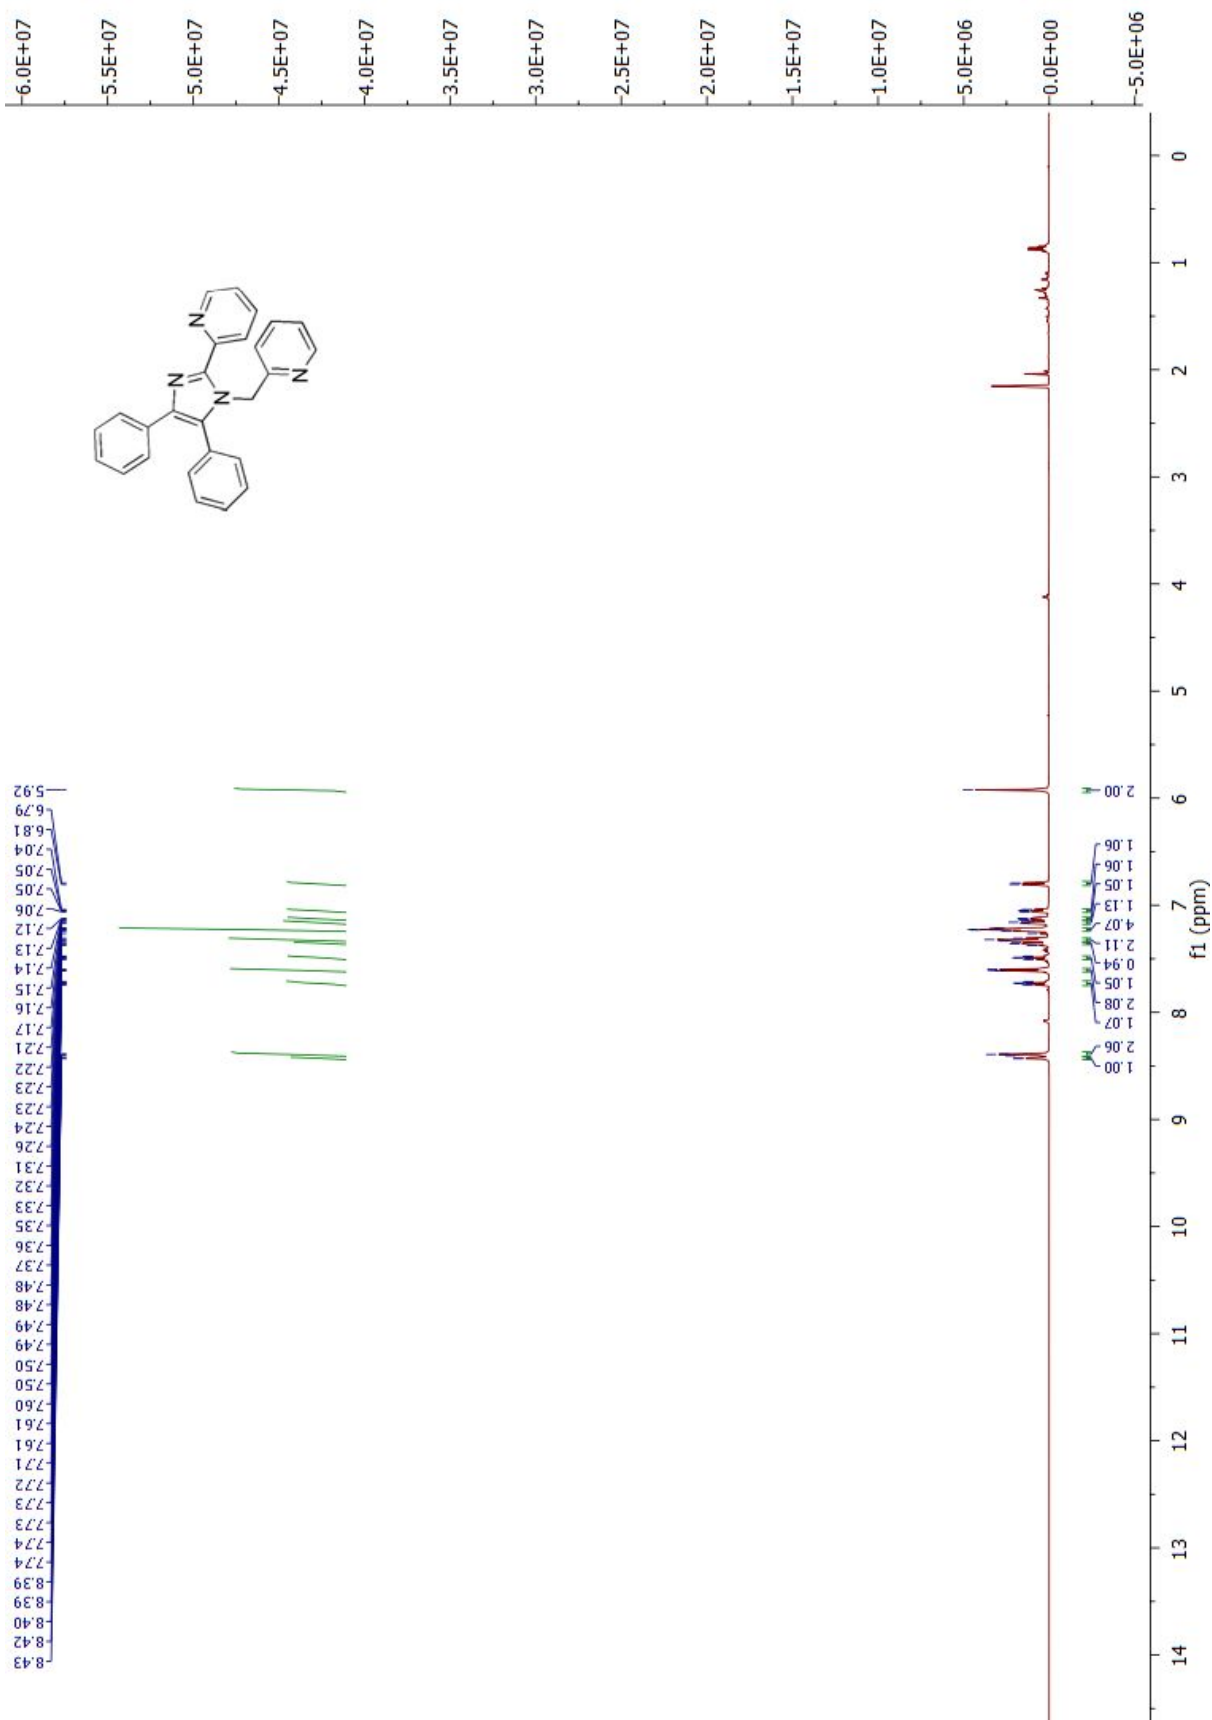

Figure S18:  $^{13}\text{C}$  NMR spectrum of 2-(4,5-diphenyl-1-(pyridin-2-ylmethyl)-1H-imidazol-2-yl)pyridine (3i) in  $\text{CDCl}_3$ .

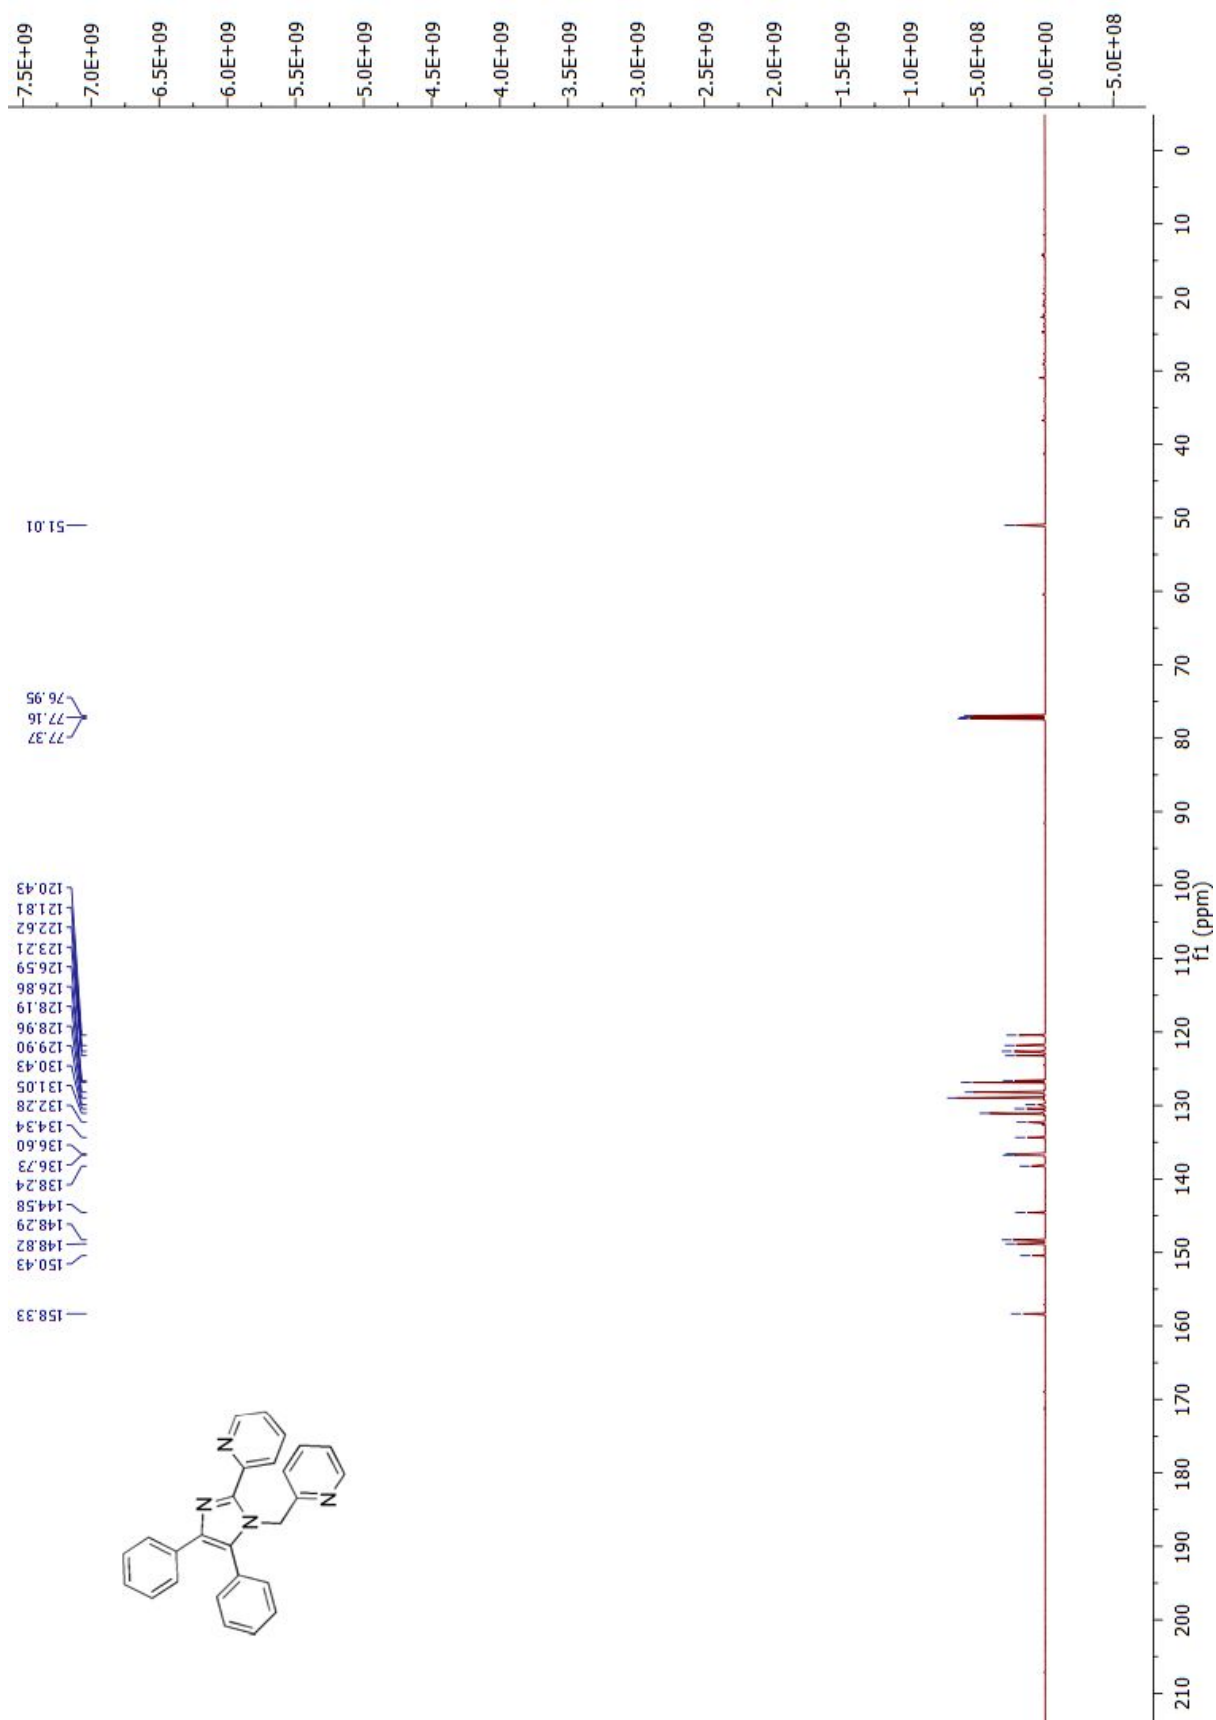

Figure S19:  $^1\text{H}$  NMR spectrum of 2-Benzo[1,3]dioxol-5-yl-1-benzo[1,3]dioxol-5-ylmethyl-4,5-diphenyl-1H-imidazole (3j) in  $\text{DMSO-d}_6$ .

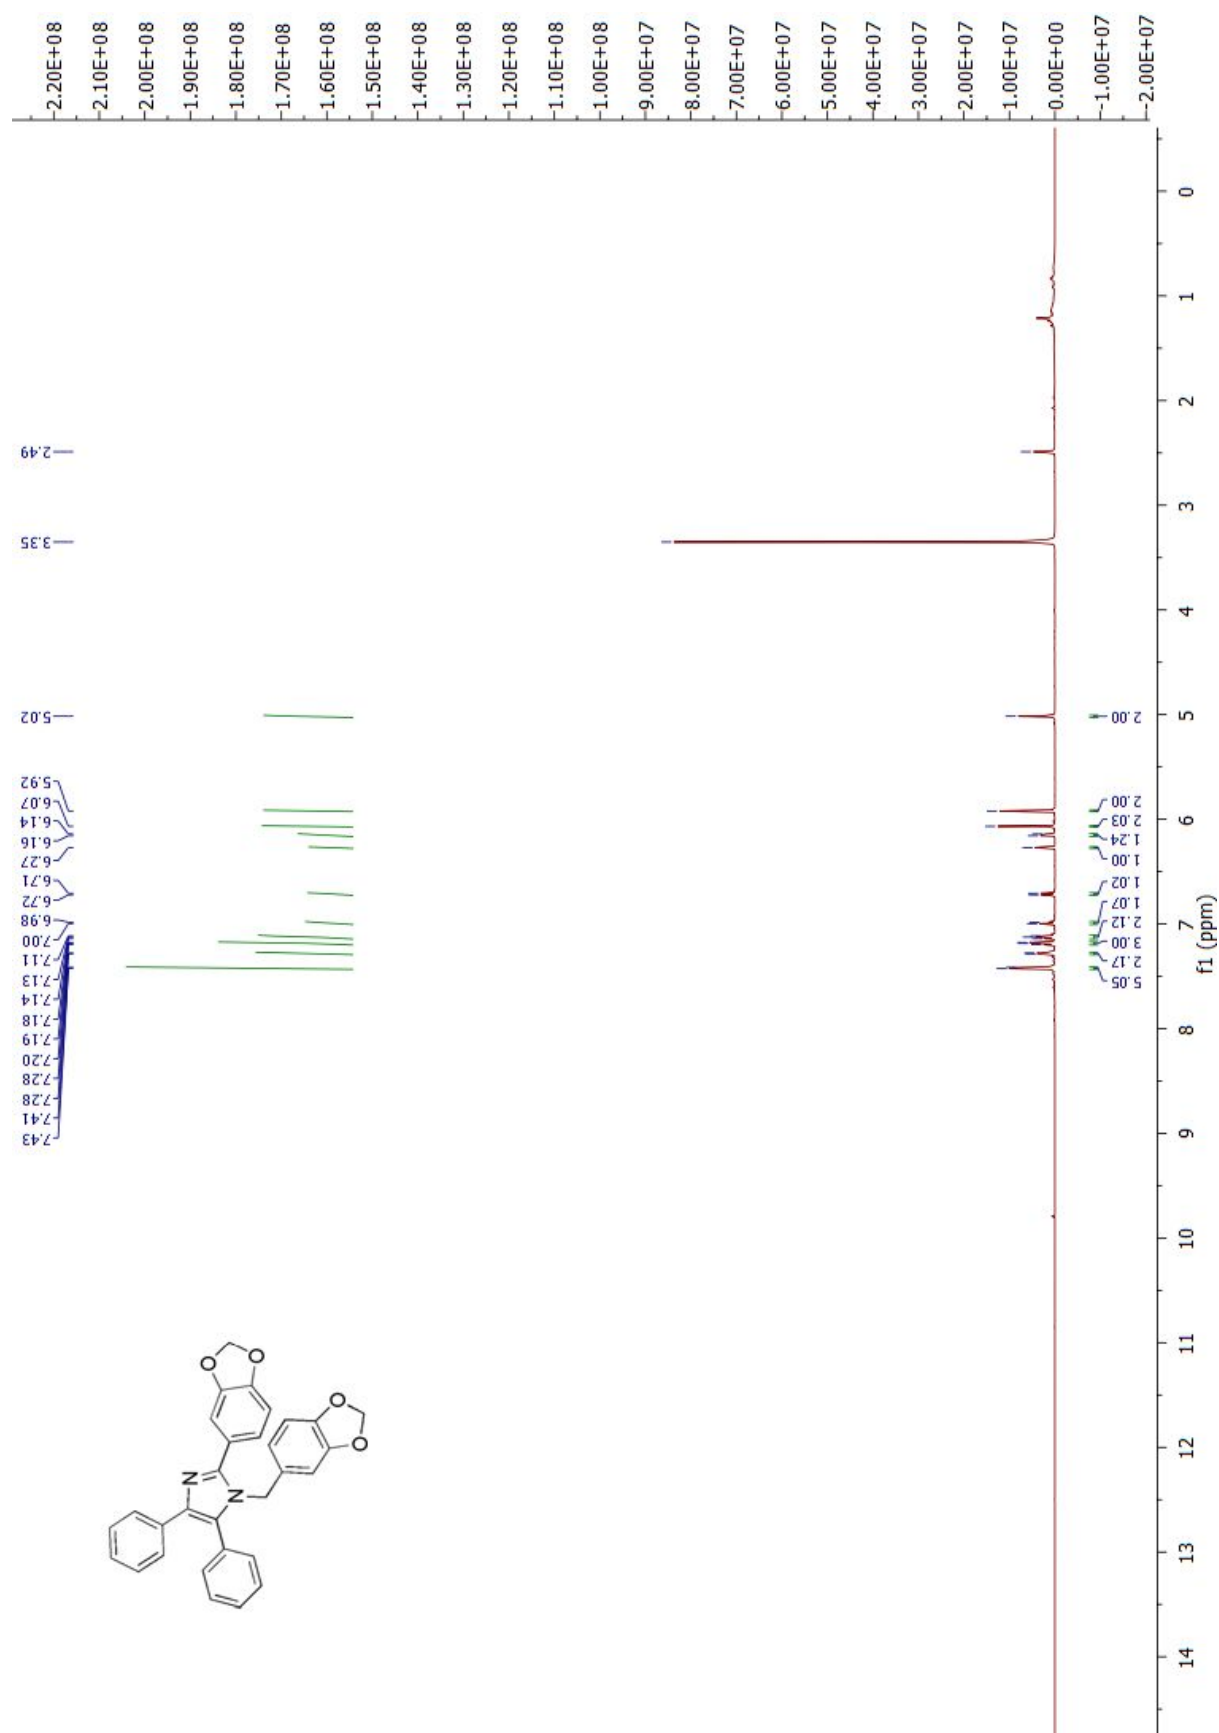

Figure S20:  $^{13}\text{C}$  NMR spectrum of 2-Benzo[1,3]dioxol-5-yl-1-benzo[1,3]dioxol-5-ylmethyl-4,5-diphenyl-1H-imidazole (3j) in  $\text{DMSO-d}_6$ .

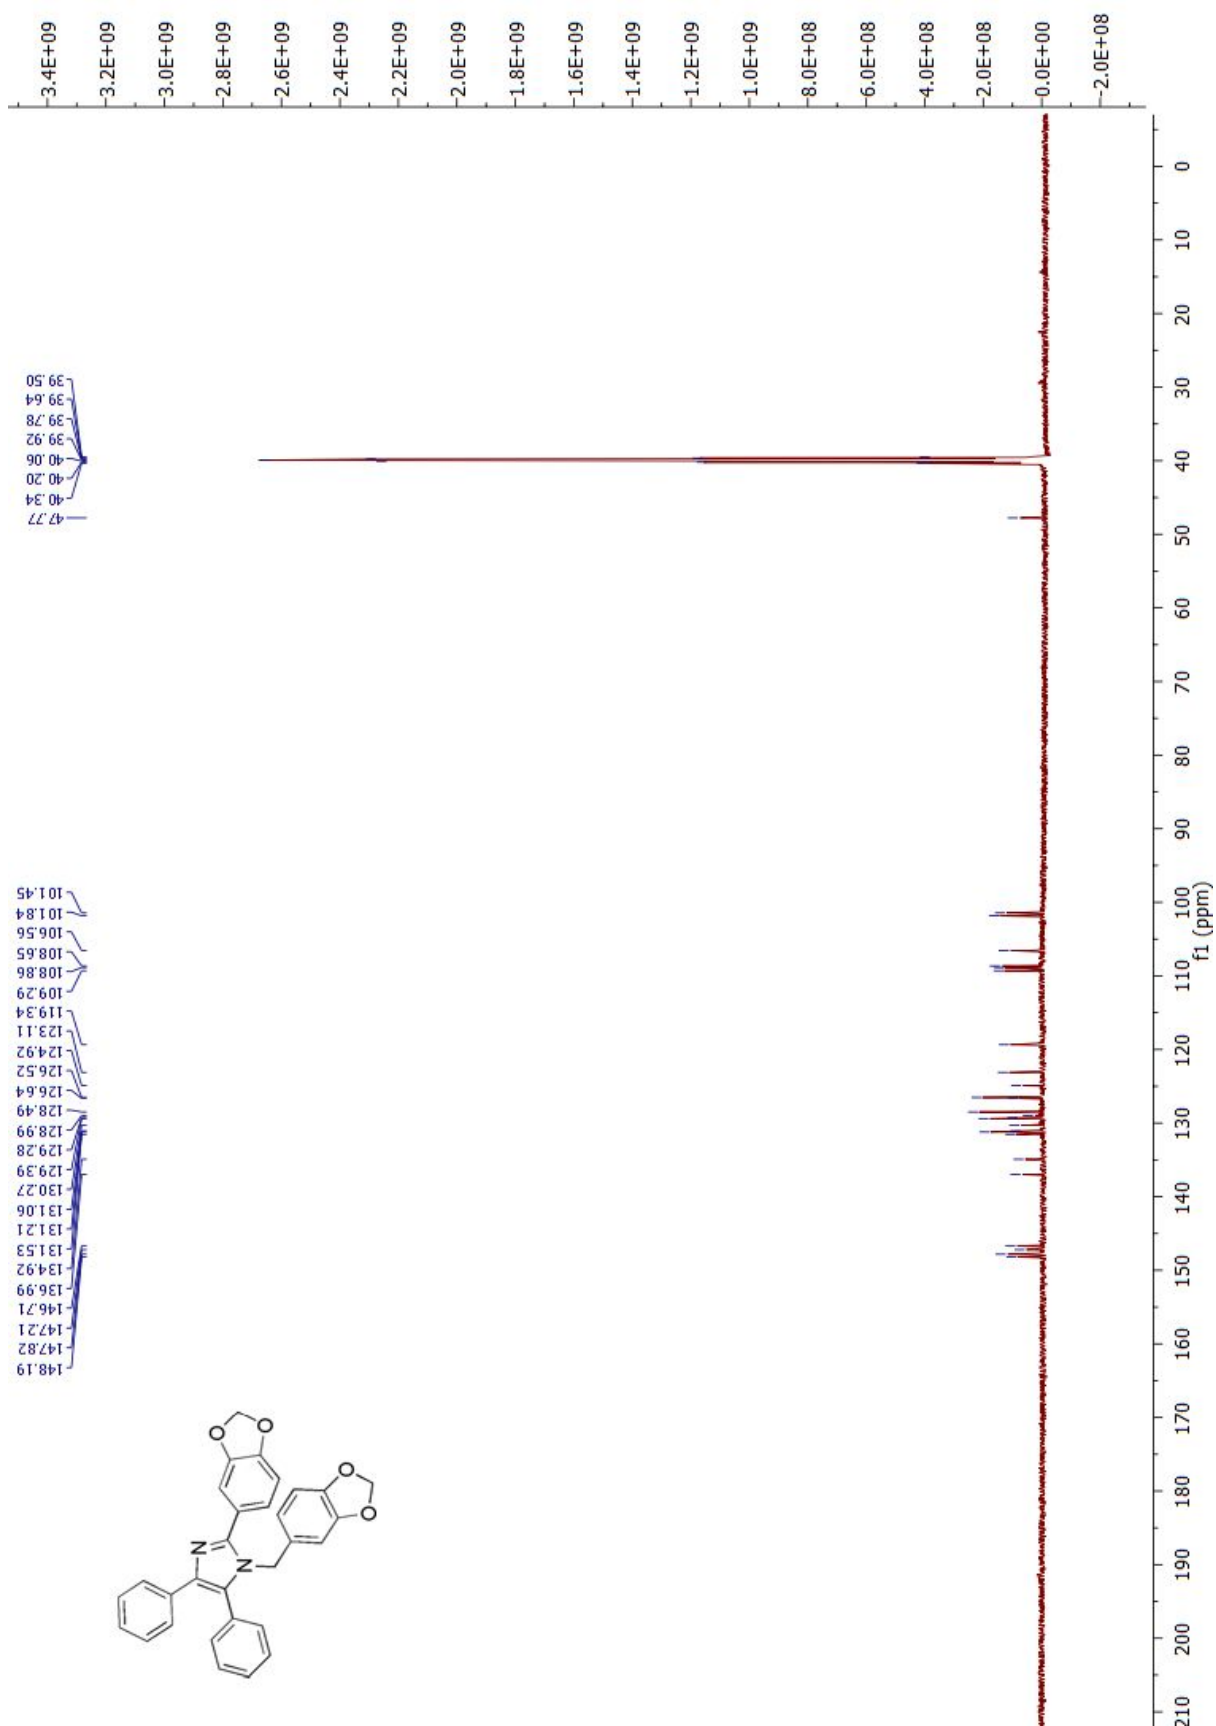

Figure S21:  $^1\text{H}$  NMR spectrum of 4,5-Diphenyl-2-thiophen-2-yl-1-thiophen-2-ylmethyl-1H-imidazole (3k) in  $\text{CDCl}_3$ .

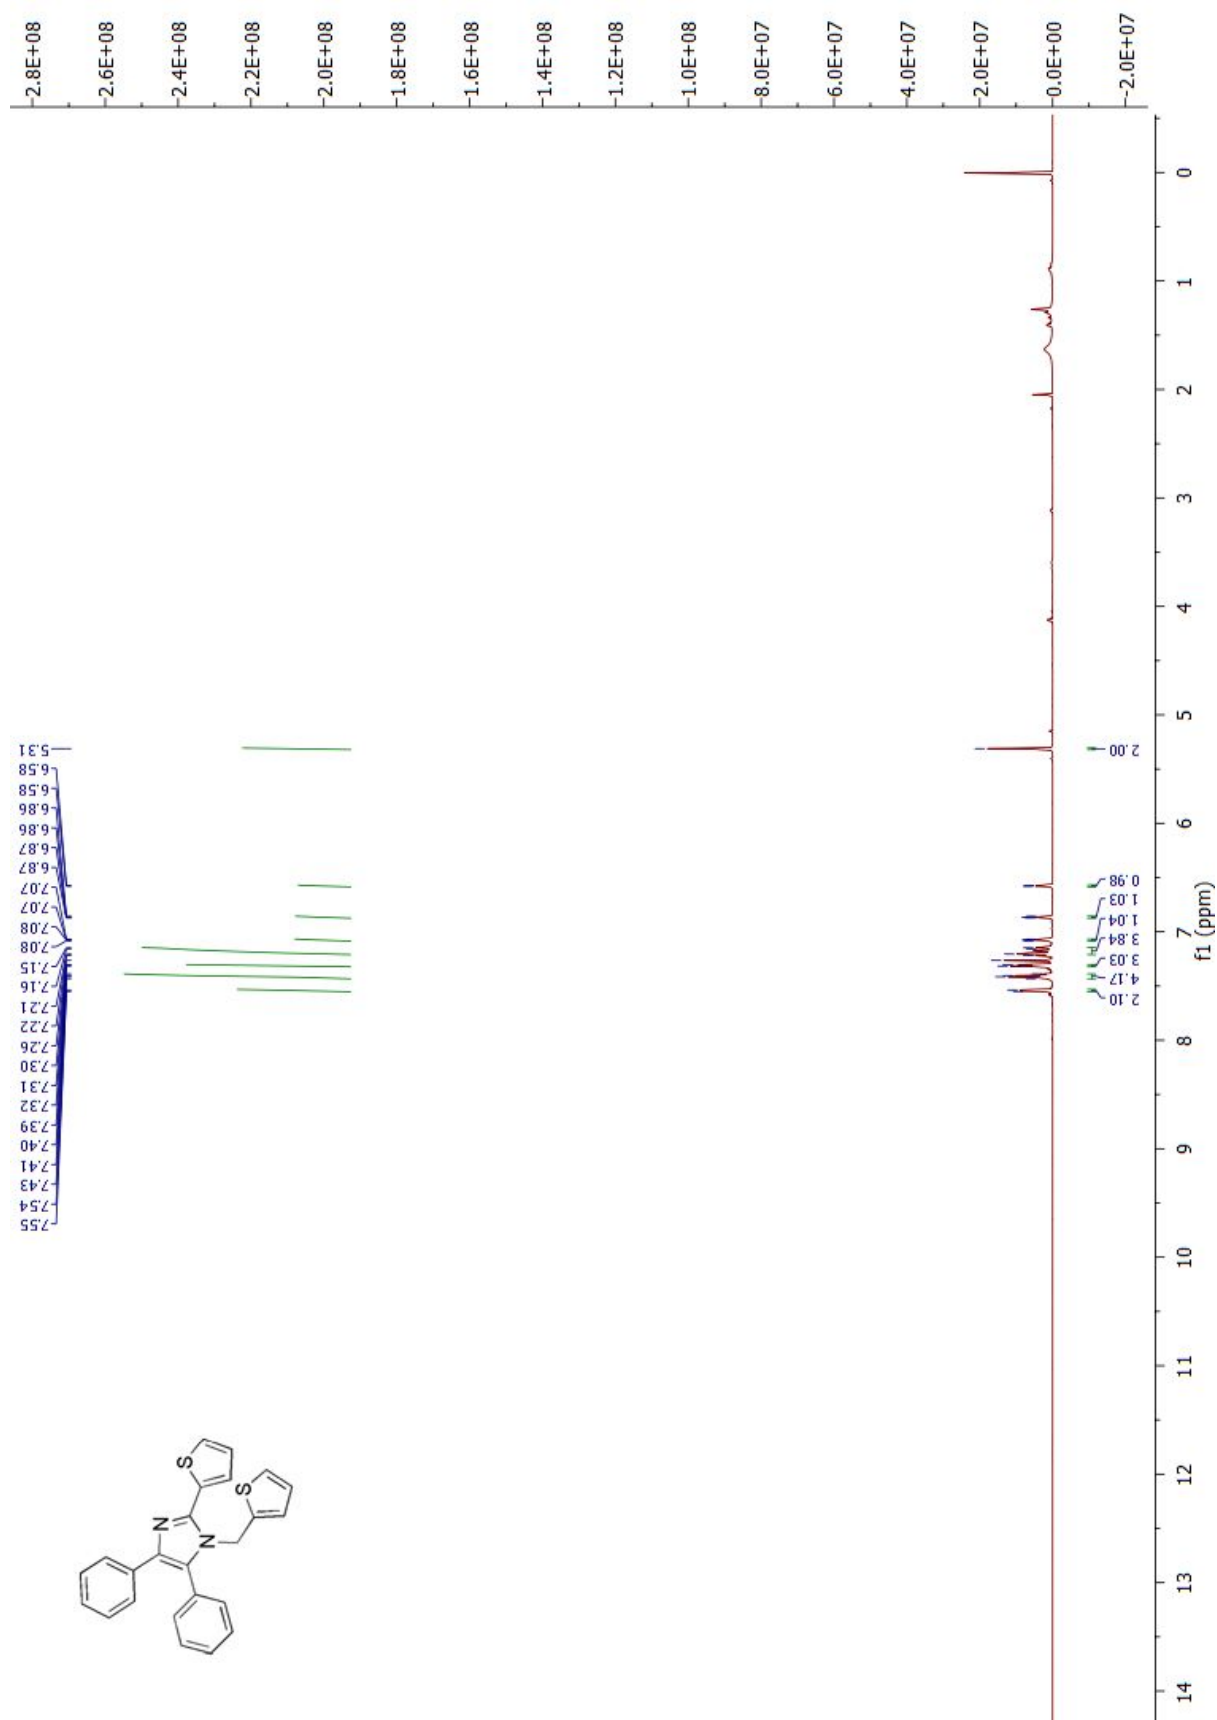

Figure S22:  $^{13}\text{C}$  NMR spectrum of 4,5-Diphenyl-2-thiophen-2-yl-1-thiophen-2-ylmethyl-1H-imidazole (3k) in  $\text{CDCl}_3$ .

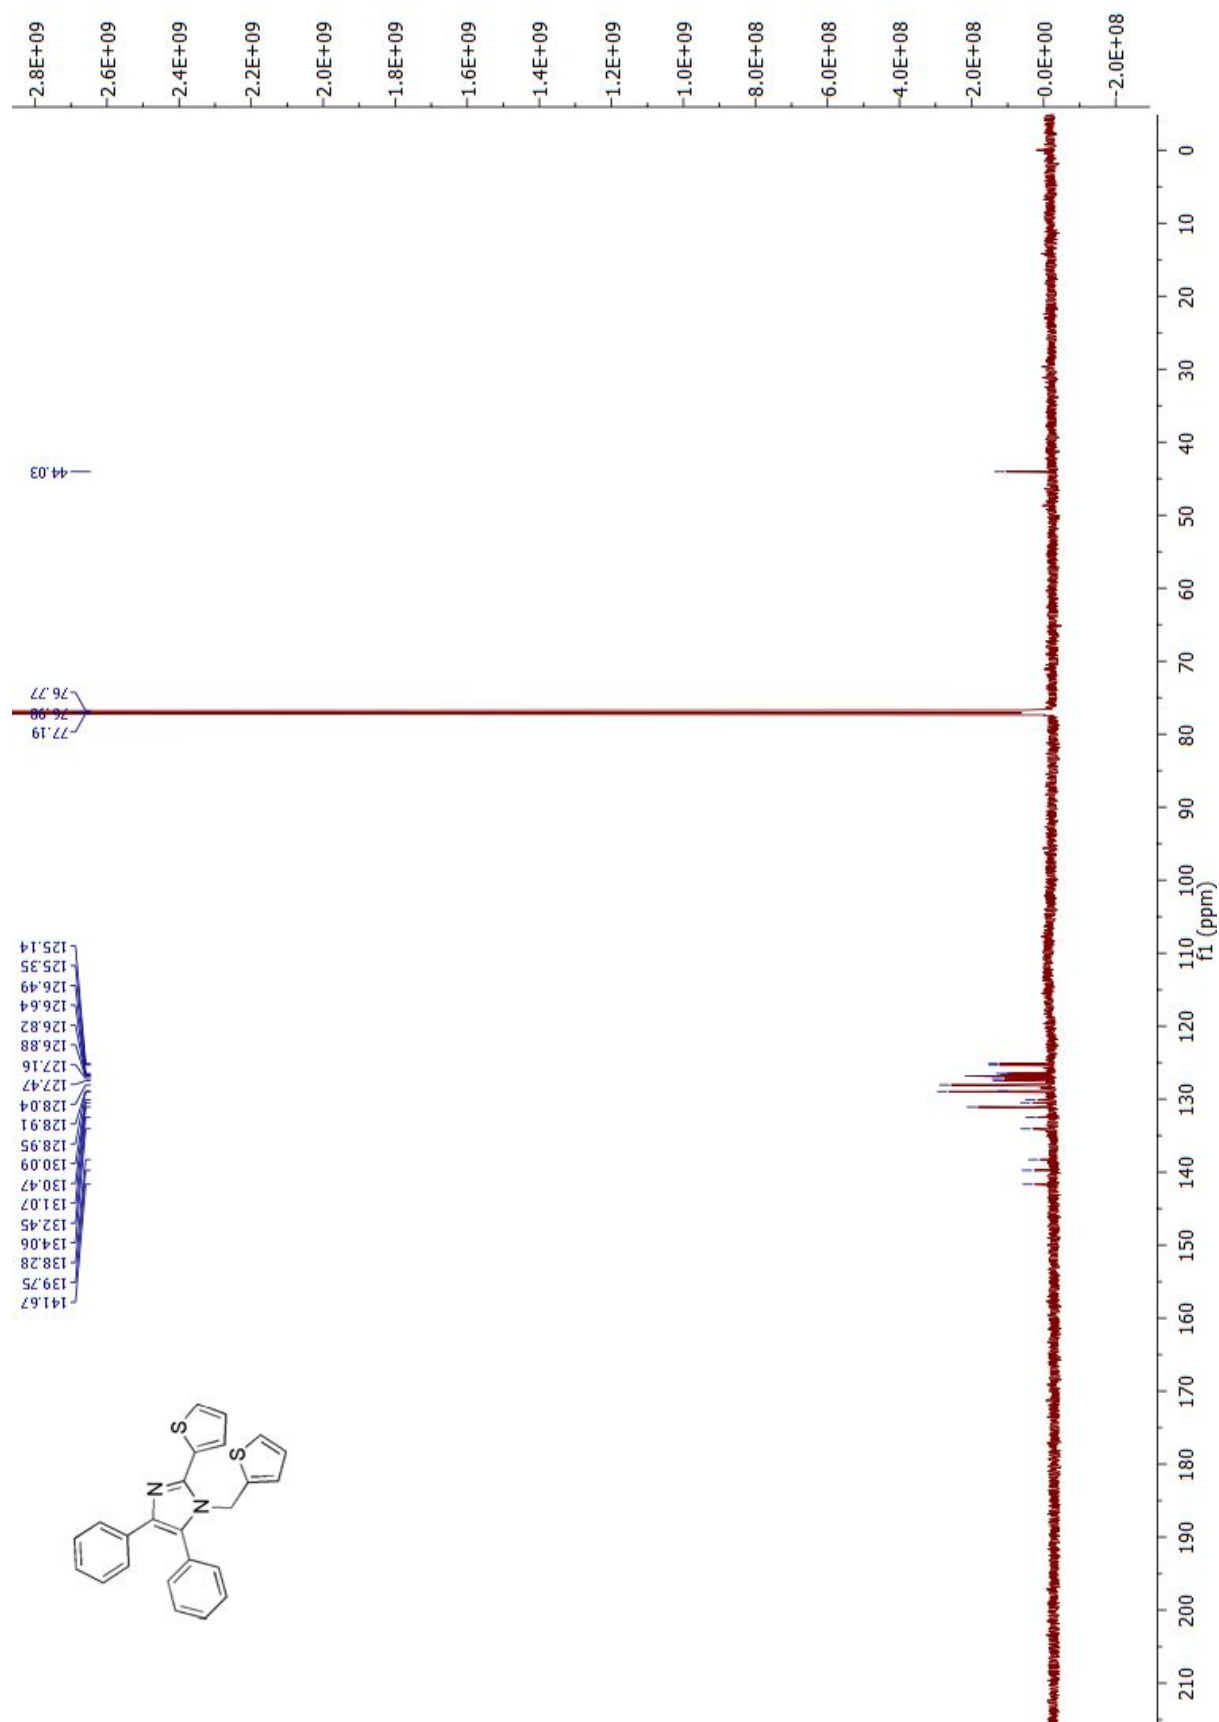



Figure S23:  $^1\text{H}$  NMR spectrum of 2-Naphthalen-1-yl-1-naphthalen-1-ylmethyl-4,5-diphenyl-1H-imidazole (3l) in  $\text{CDCl}_3$ .

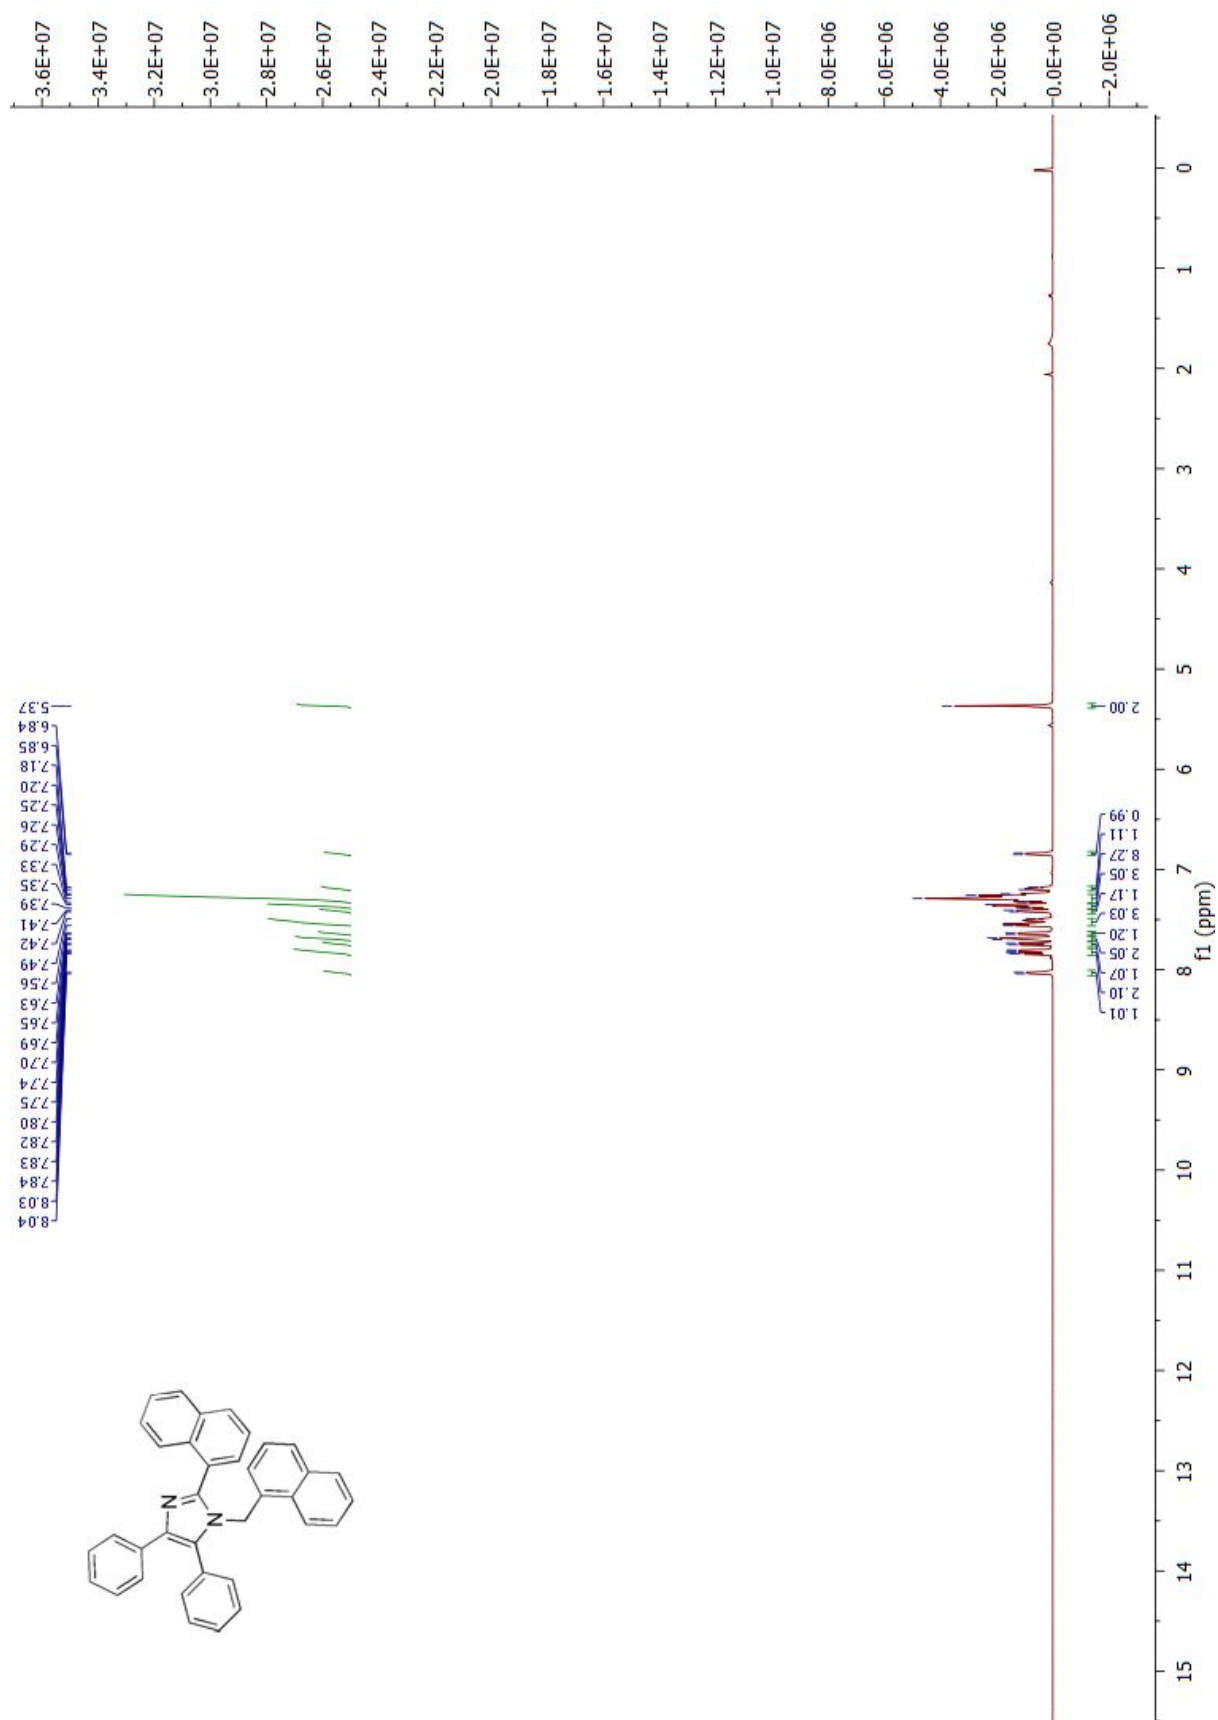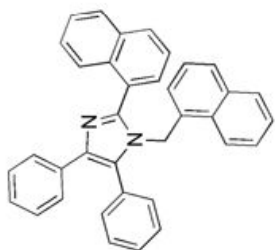

Figure S24:  $^{13}\text{C}$  NMR spectrum of 2-Naphthalen-1-yl-1-naphthalen-1-ylmethyl-4,5-diphenyl-1H-imidazole (3l) in  $\text{CDCl}_3$ .

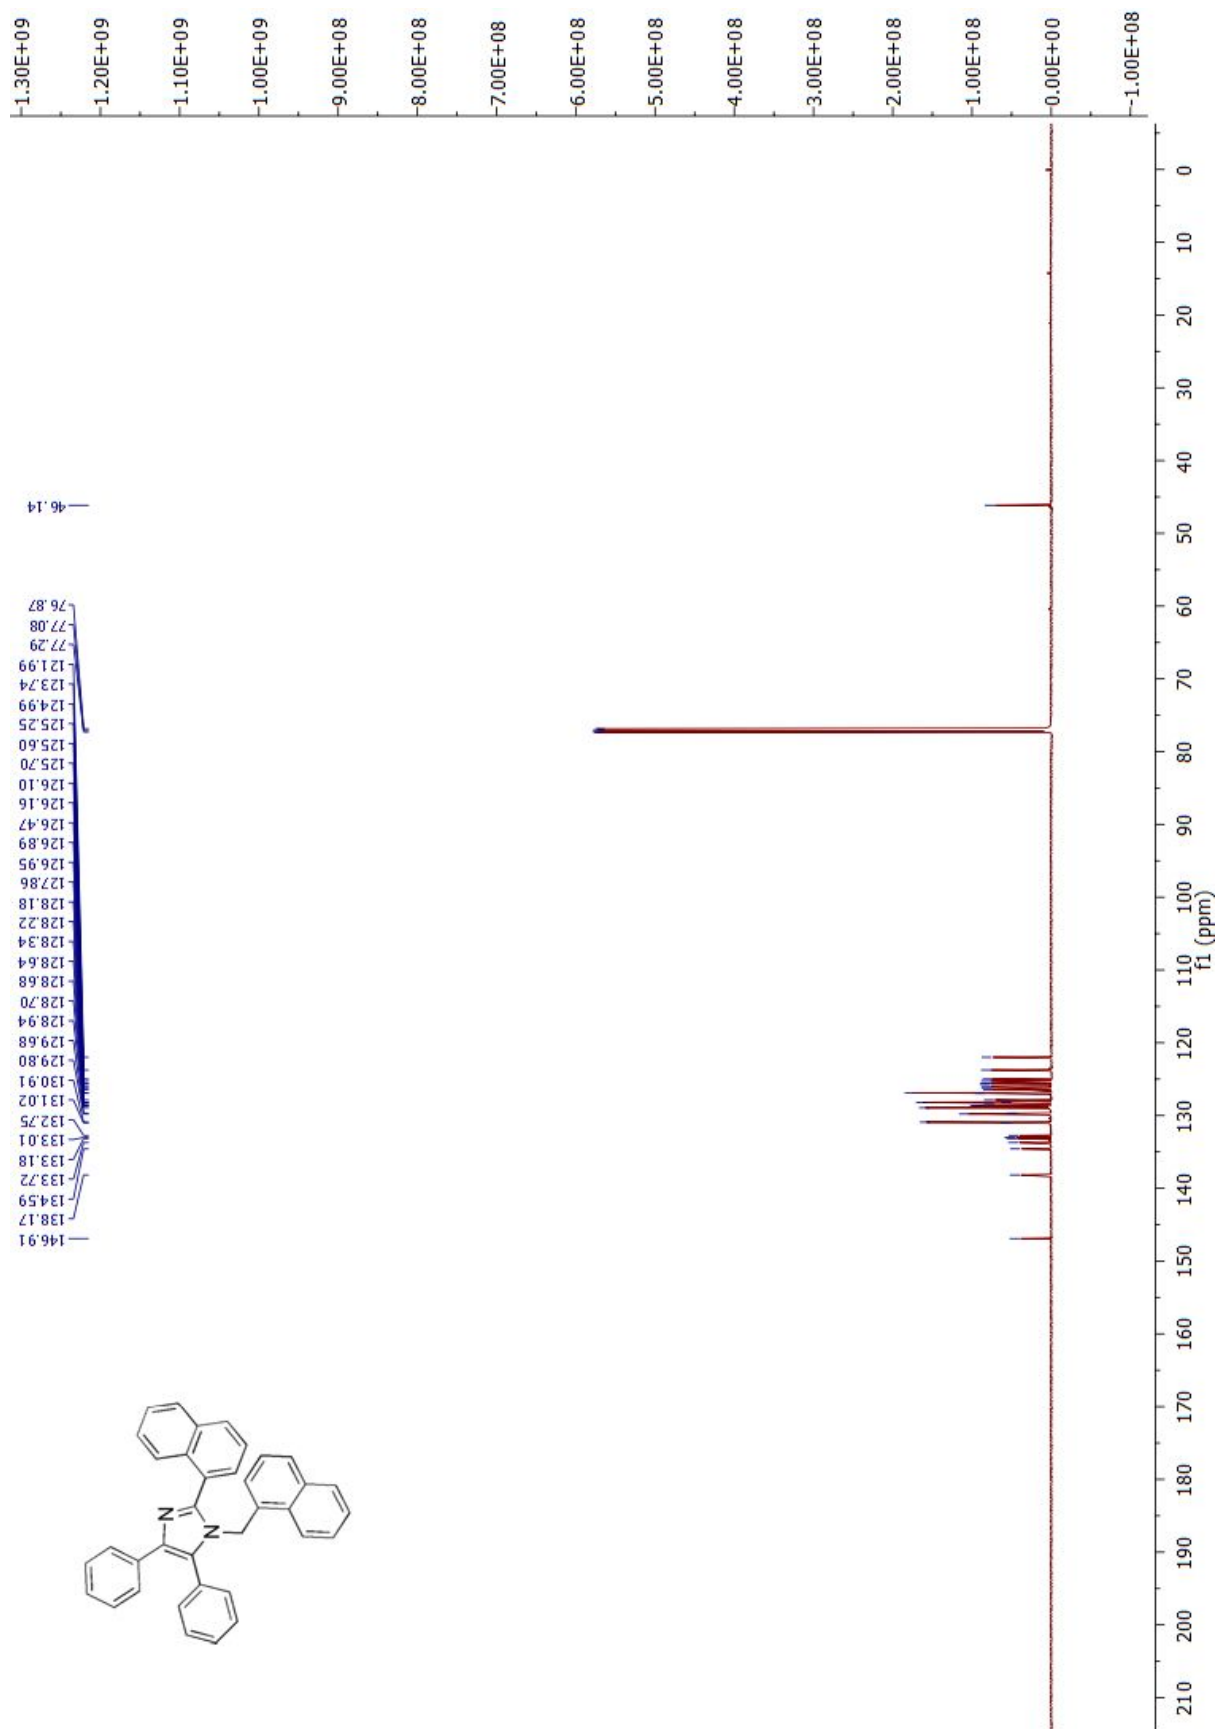

Figure S25:  $^1\text{H}$  NMR spectrum of 1-Benzyl-4,5-bis-(4-methoxy-phenyl)-2-phenyl-1H-imidazole (3o) in  $\text{DMSO-d}_6$ .

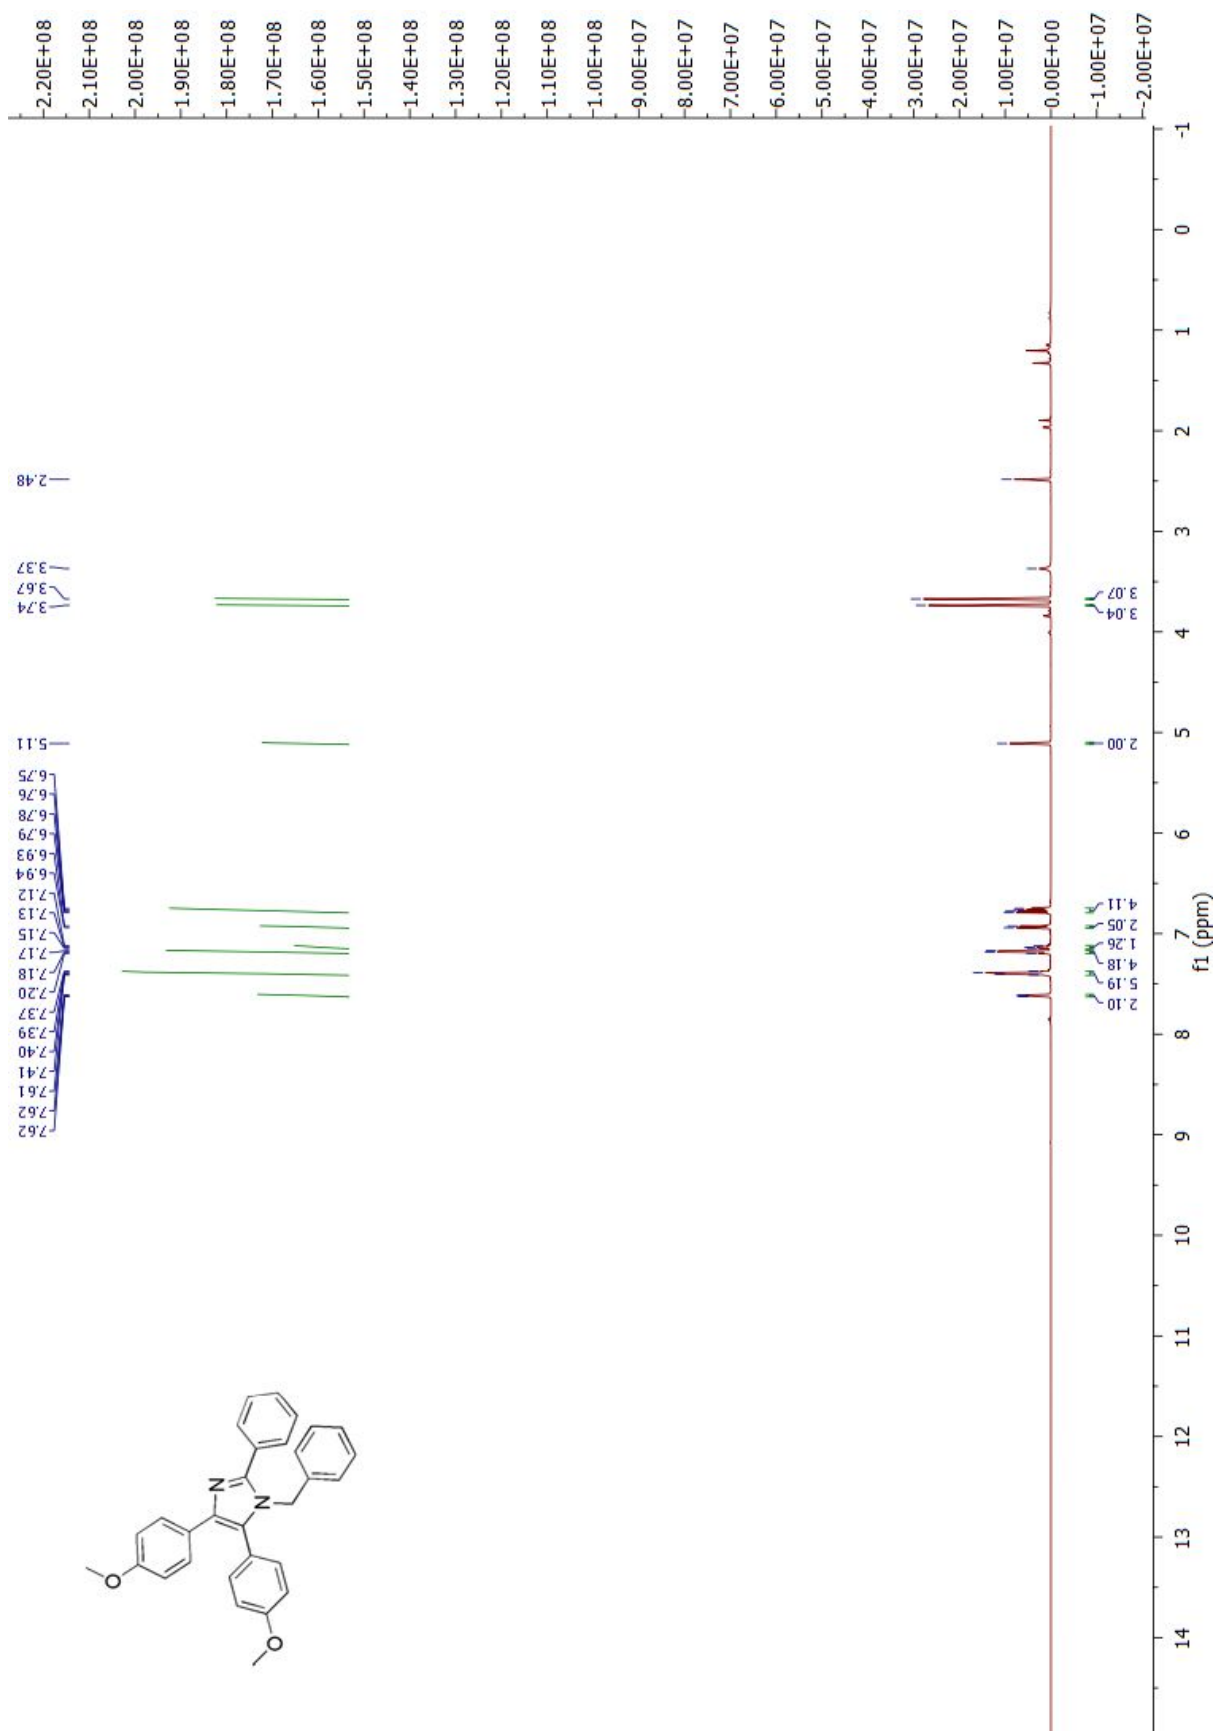

Figure S26:  $^{13}\text{C}$  NMR spectrum of 1-Benzyl-4,5-bis-(4-methoxy-phenyl)-2-phenyl-1H-imidazole (3o) in  $\text{DMSO-d}_6$ .

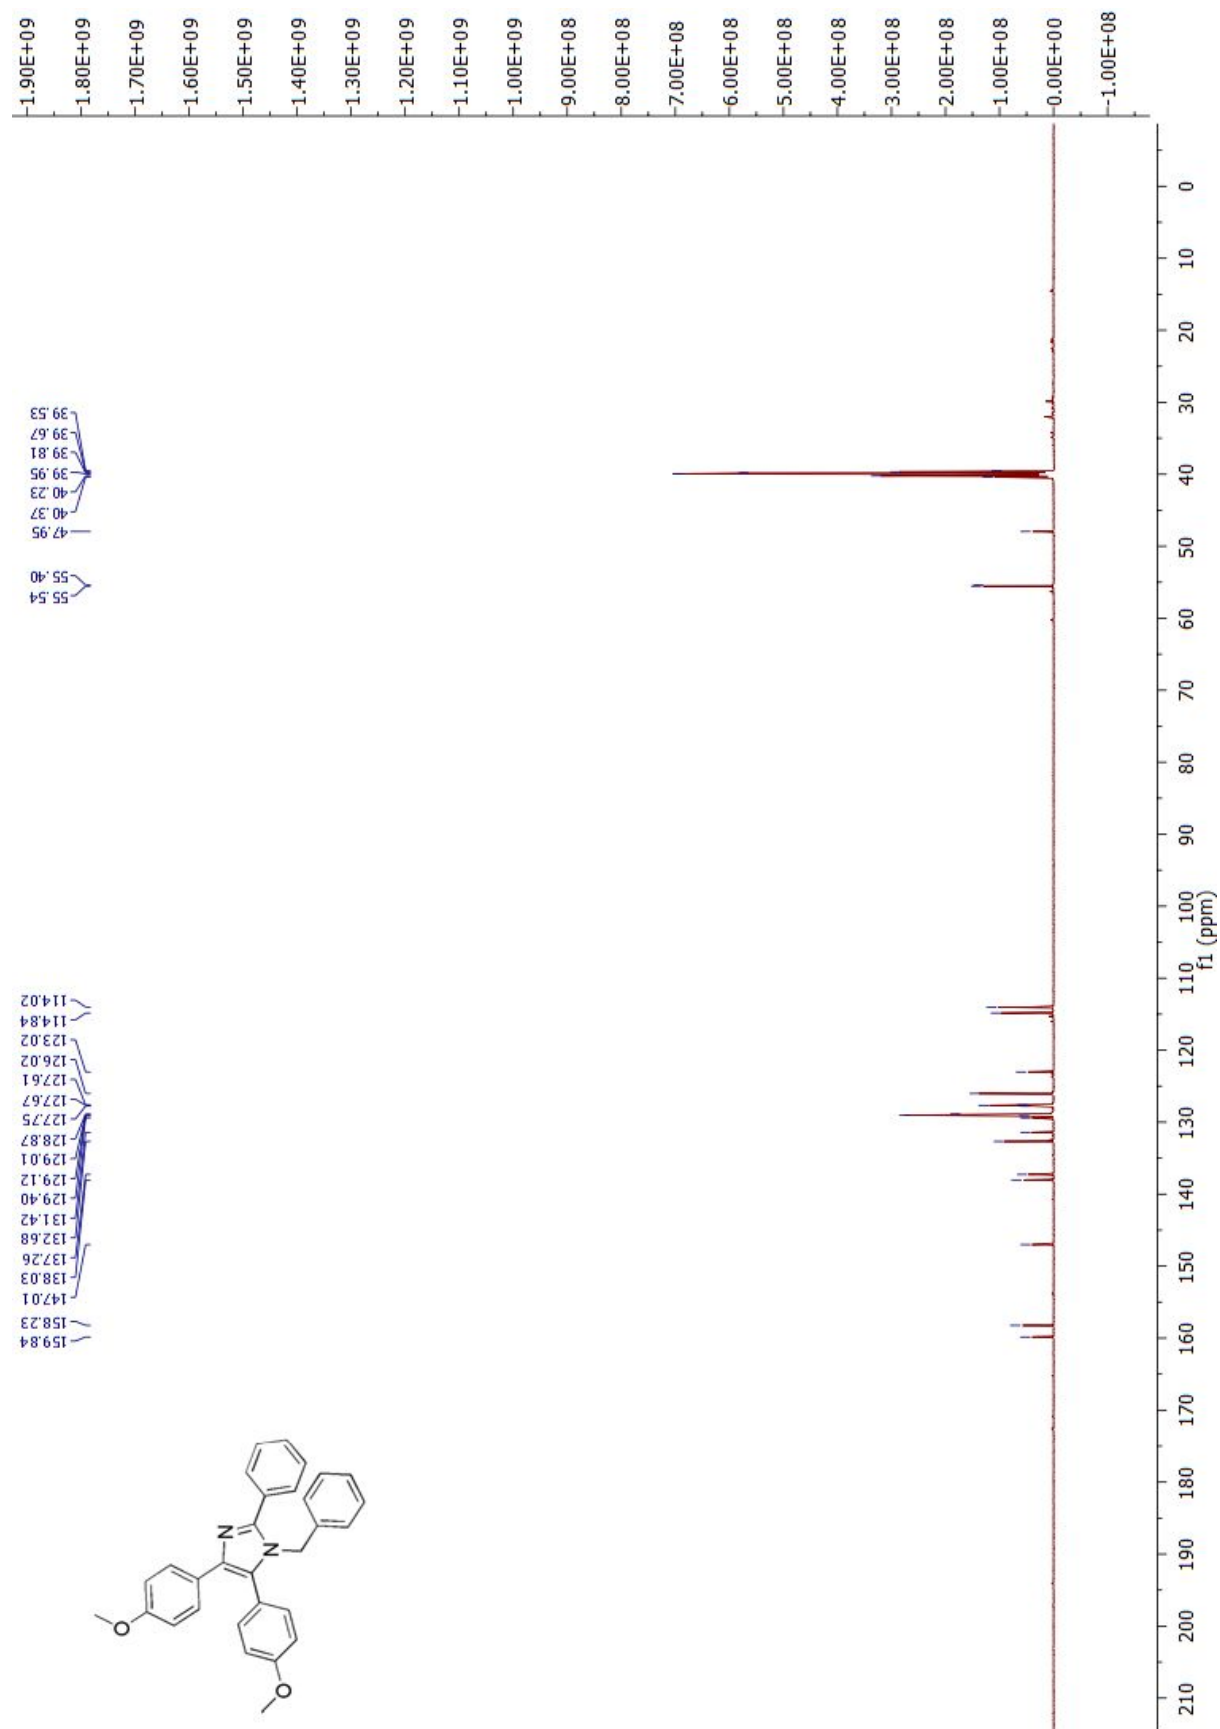



Figure S28:  $^{13}\text{C}$  NMR spectrum of 2-(4,5-bis(4-methoxyphenyl)-1-(pyridin-2-ylmethyl)-1H-imidazol-2-yl)pyridine (3p) in  $\text{DMSO-d}_6$ .

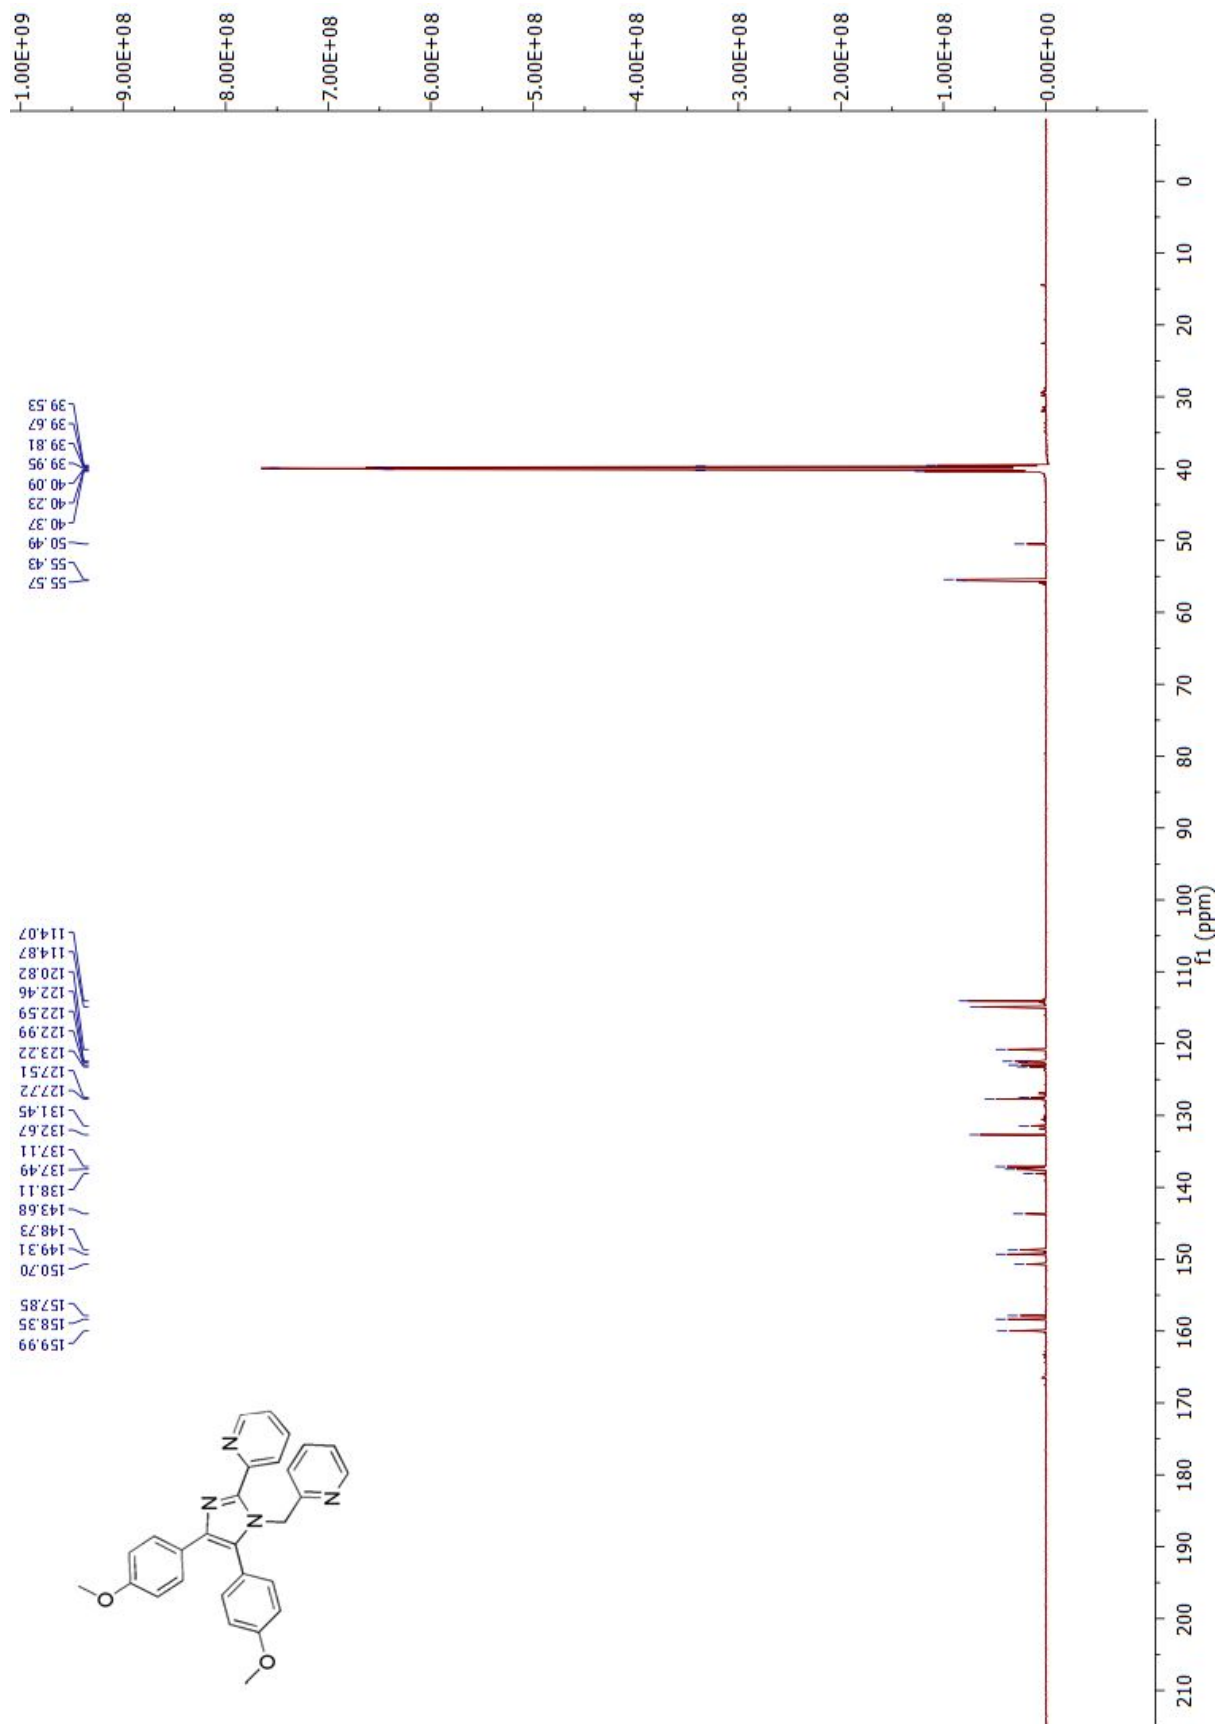

Figure S29:  $^1\text{H}$  NMR spectrum of 1-Benzyl-5-methyl-2,4-diphenyl-1H-imidazole (5a) in  $\text{CDCl}_3$ .

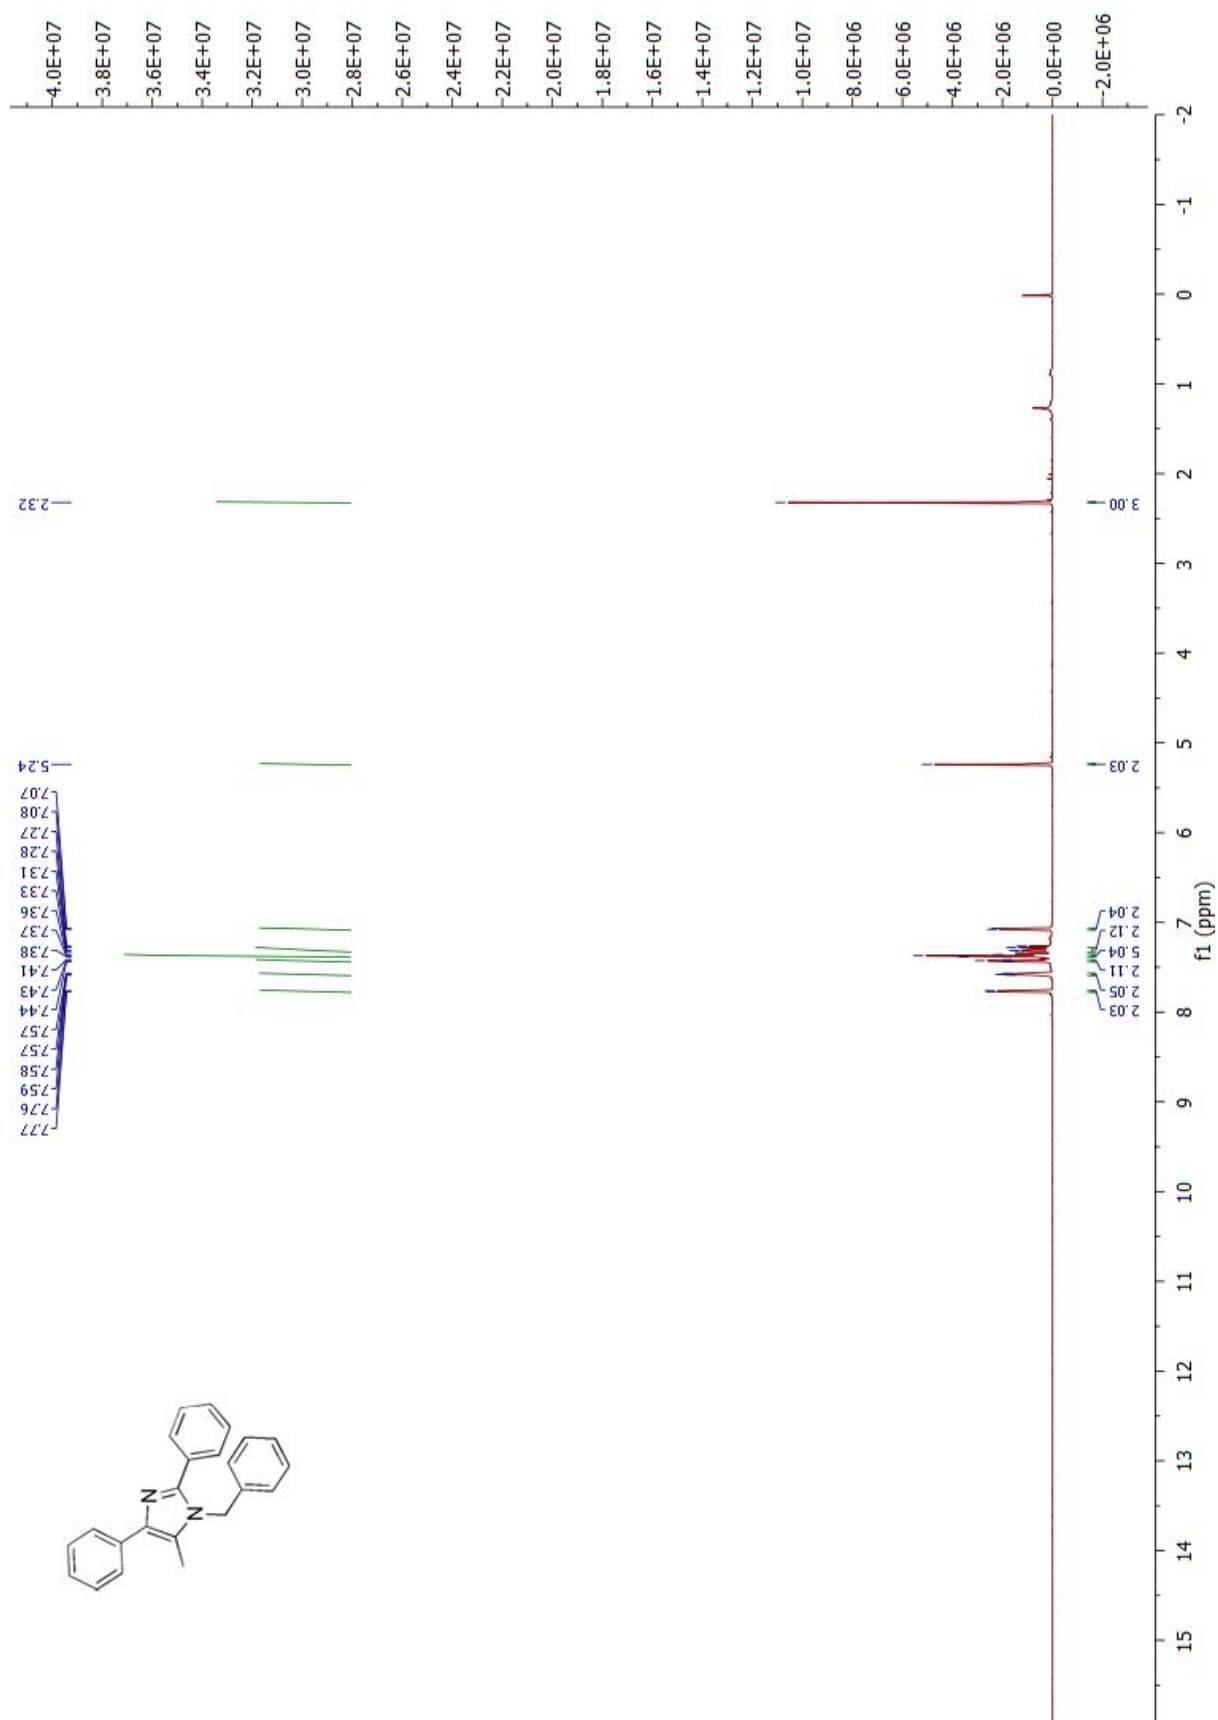

Figure S30:  $^{13}\text{C}$  NMR spectrum of 1-Benzyl-5-methyl-2,4-diphenyl-1H-imidazole (5a) in  $\text{CDCl}_3$ .

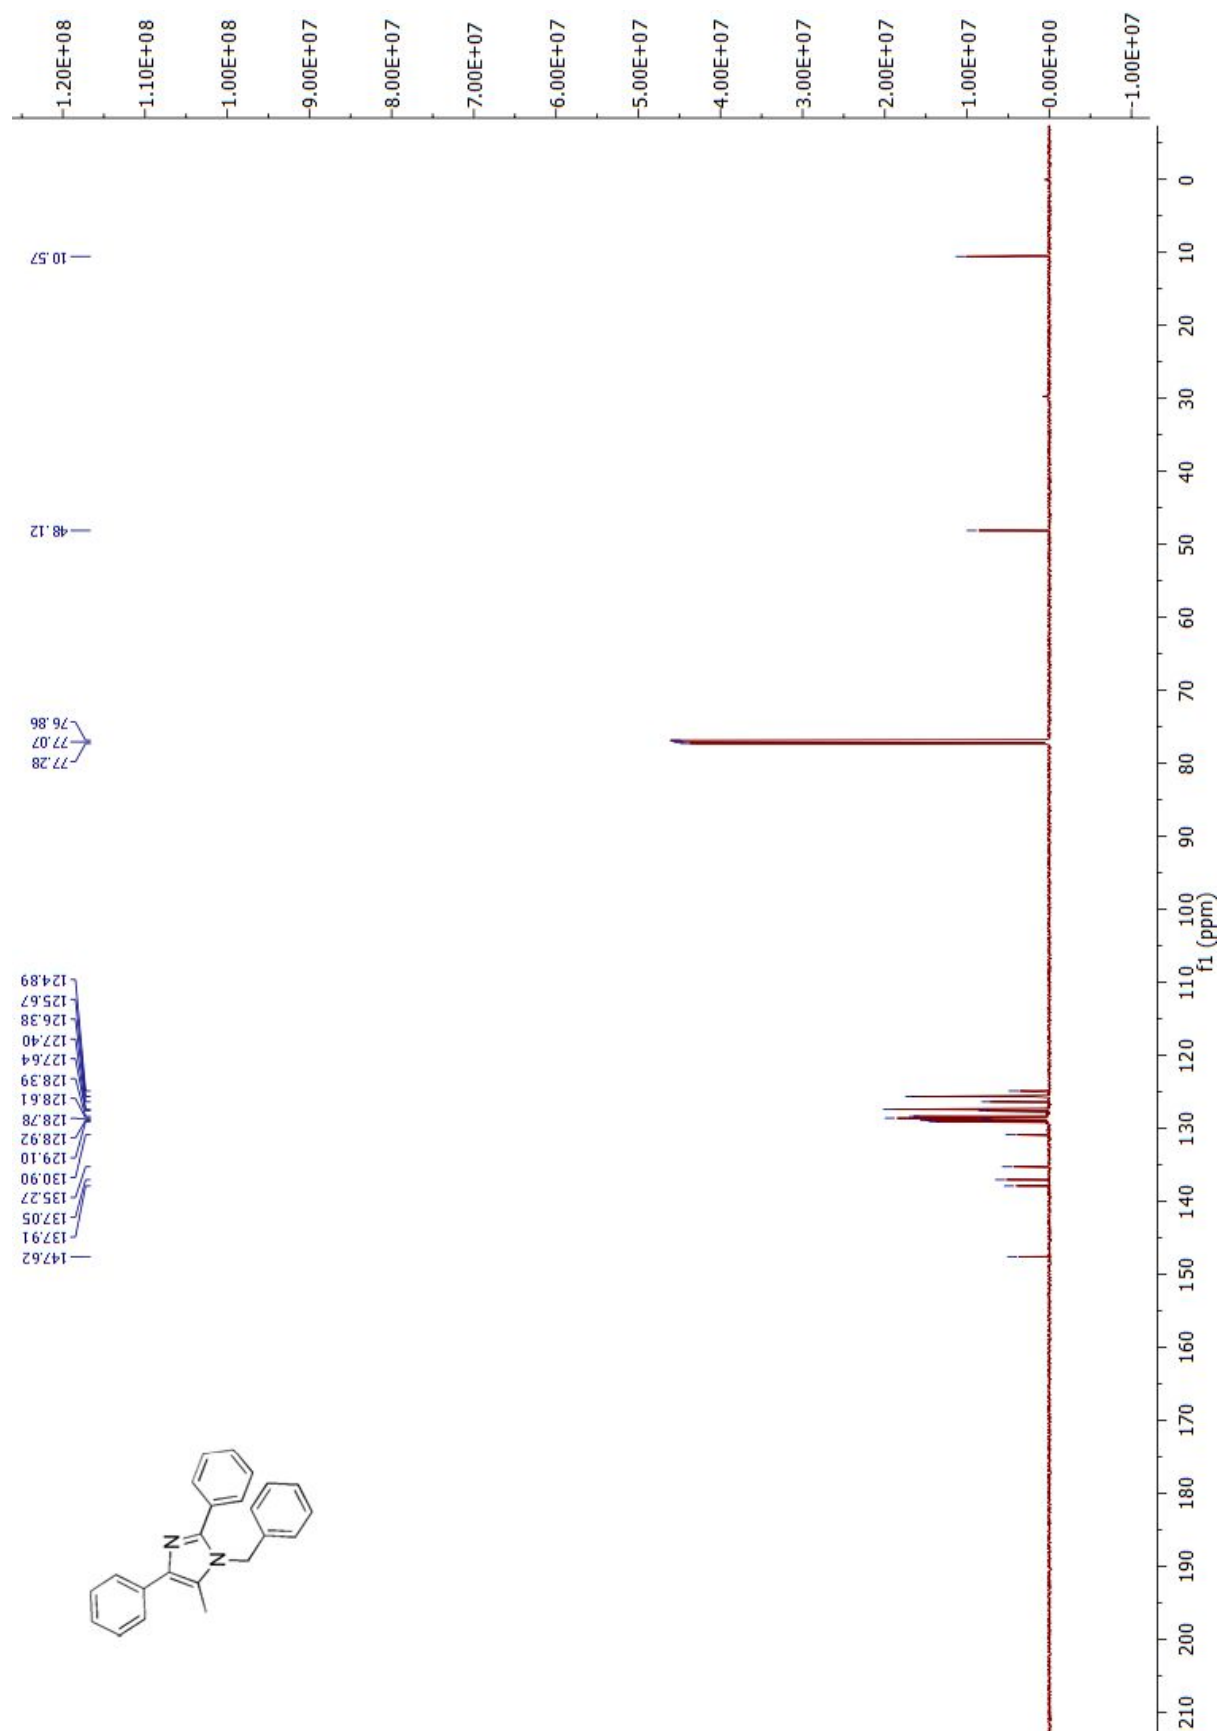



Figure S31:  $^1\text{H}$  NMR spectrum of 1-(4-Methoxy-benzyl)-2-(4-methoxy-phenyl)-5-methyl-4-phenyl-1H-imidazole (5b) in  $\text{CDCl}_3$ .

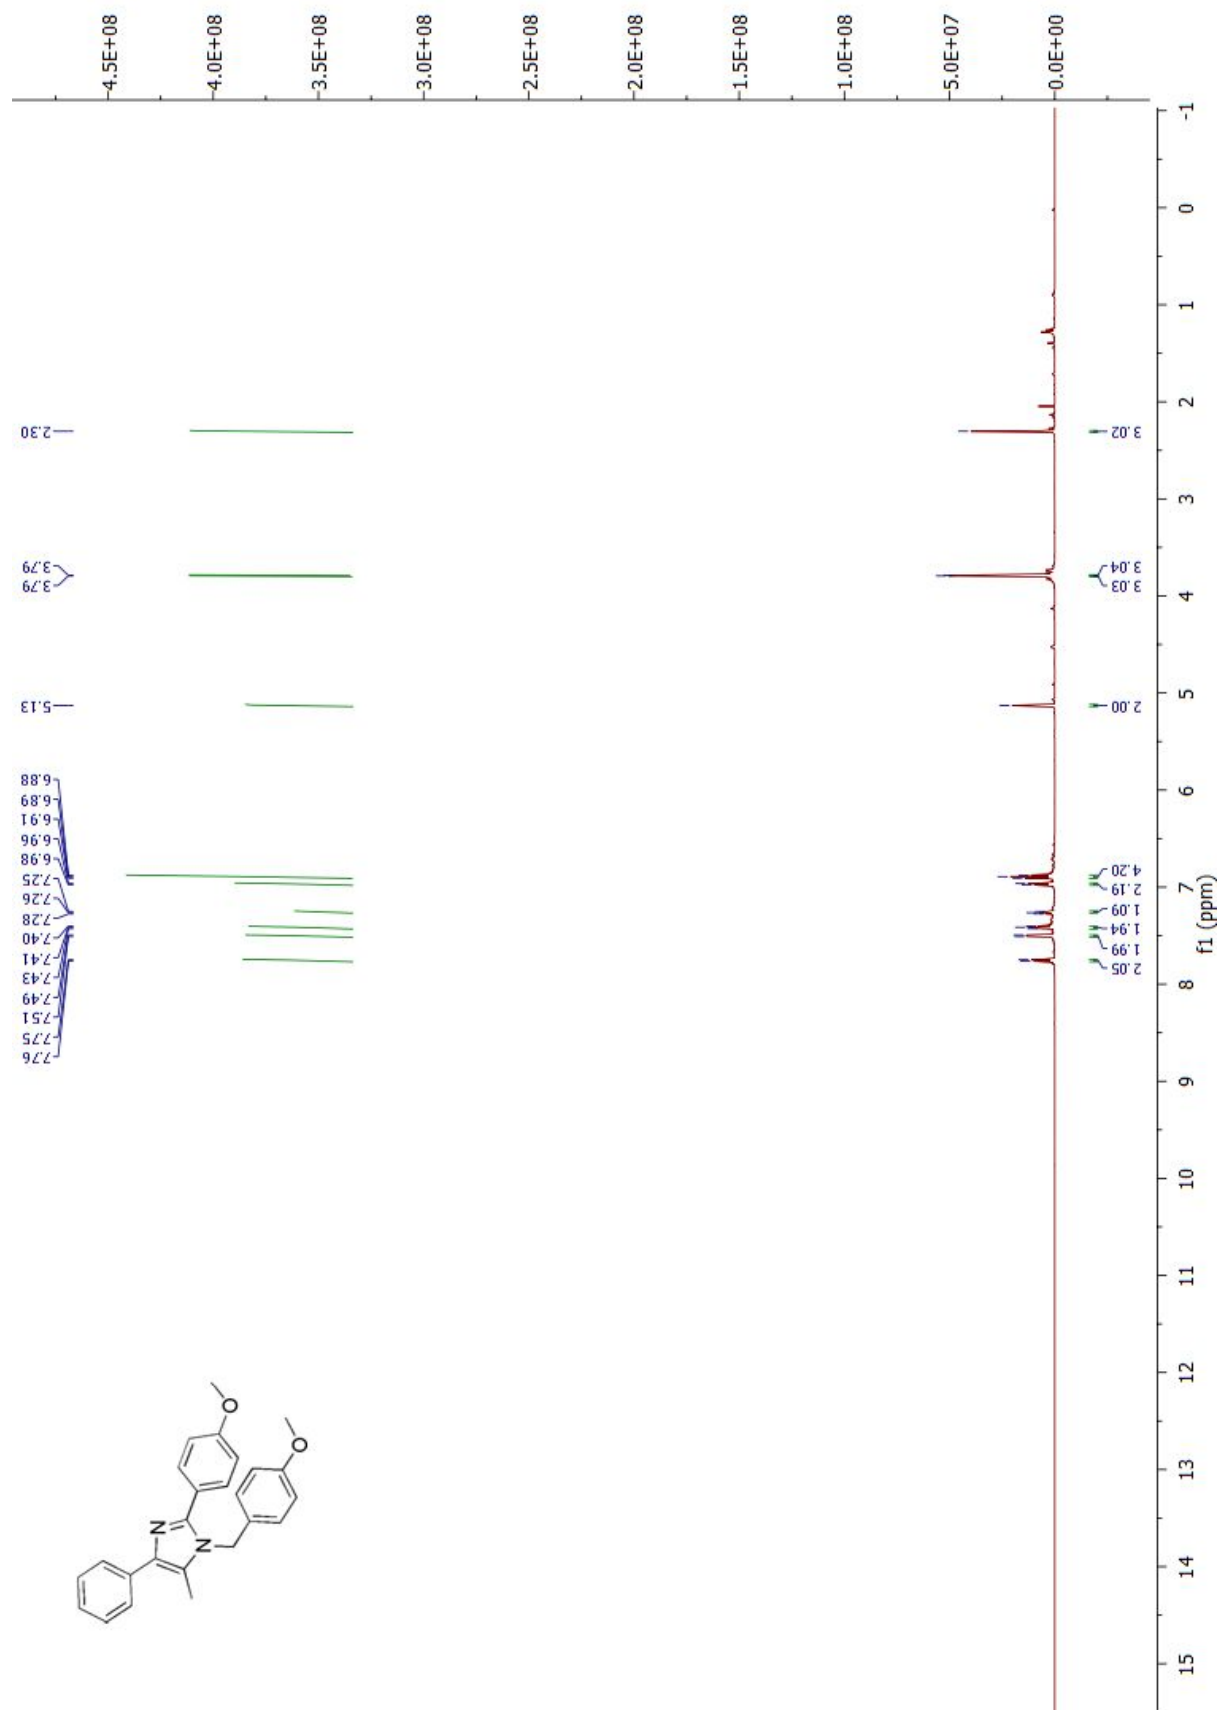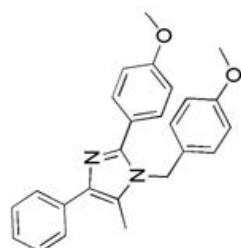

Figure S32:  $^{13}\text{C}$  NMR spectrum of 1-(4-Methoxy-benzyl)-2-(4-methoxy-phenyl)-5-methyl-4-phenyl-1H-imidazole (5b) in  $\text{CDCl}_3$ .

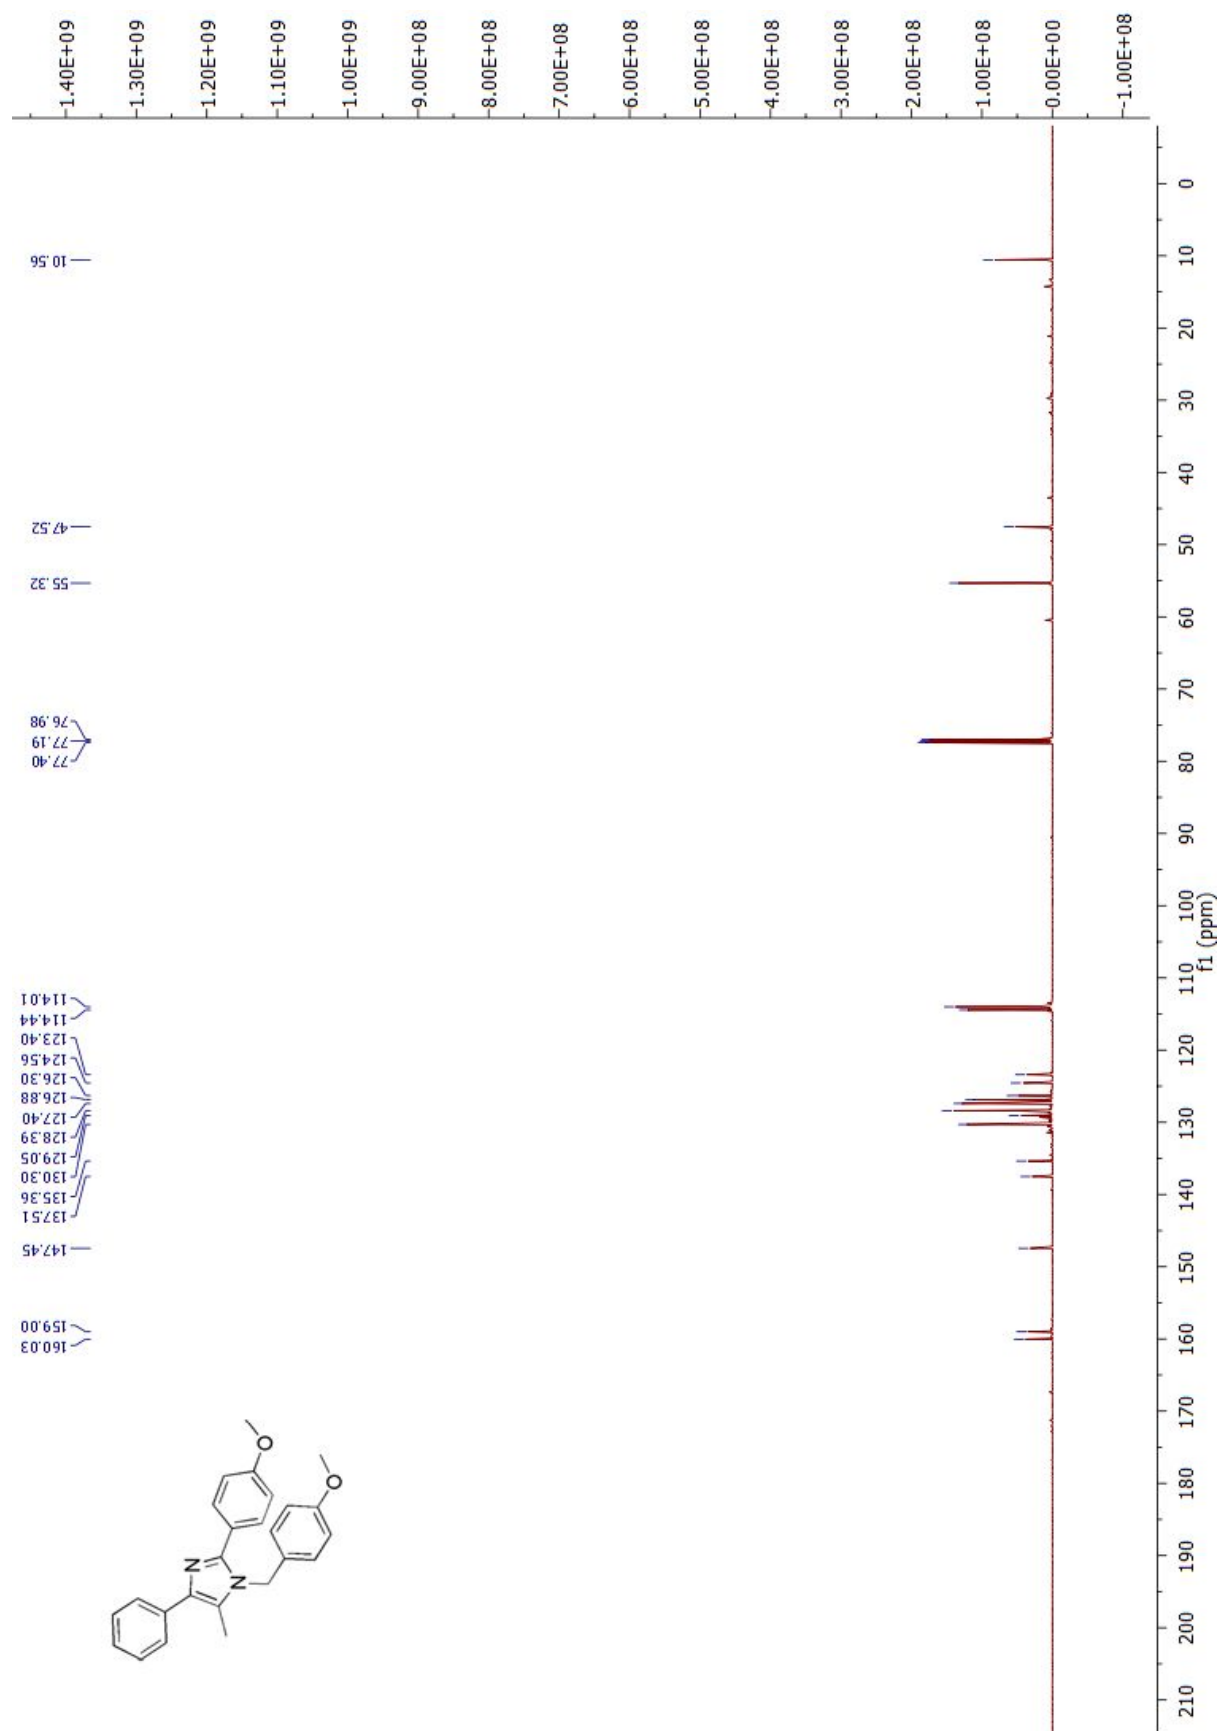

Figure S33: <sup>1</sup>H NMR spectrum of 1-Benzyl-4-(2-chloro-phenyl)-5-(3,4-dimethoxy-phenyl)-2-phenyl-1H-imidazole (5c) in DMSO-d<sub>6</sub>.

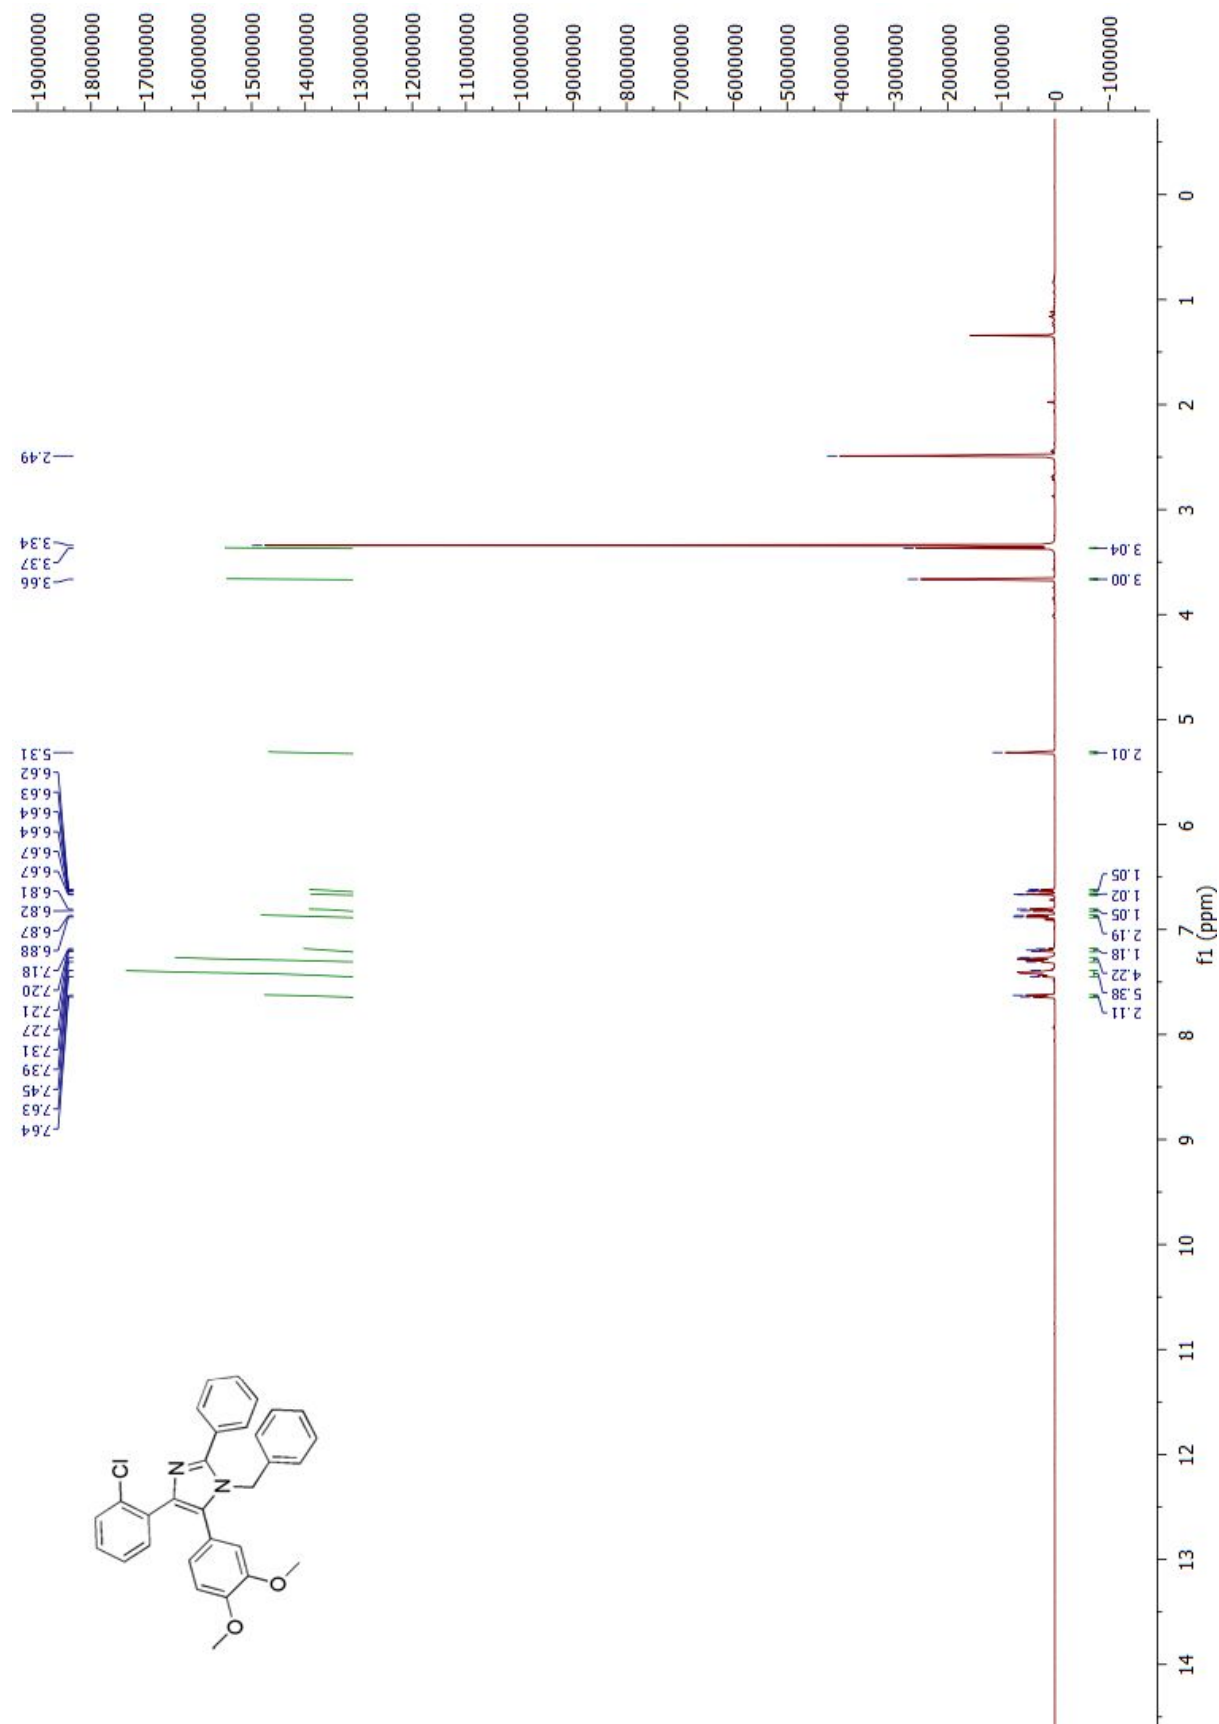

Figure S34:  $^{13}\text{C}$  NMR spectrum of 1-Benzyl-4-(2-chloro-phenyl)-5-(3,4-dimethoxy-phenyl)-2-phenyl-1H-imidazole (5c) in  $\text{DMSO-d}_6$ .

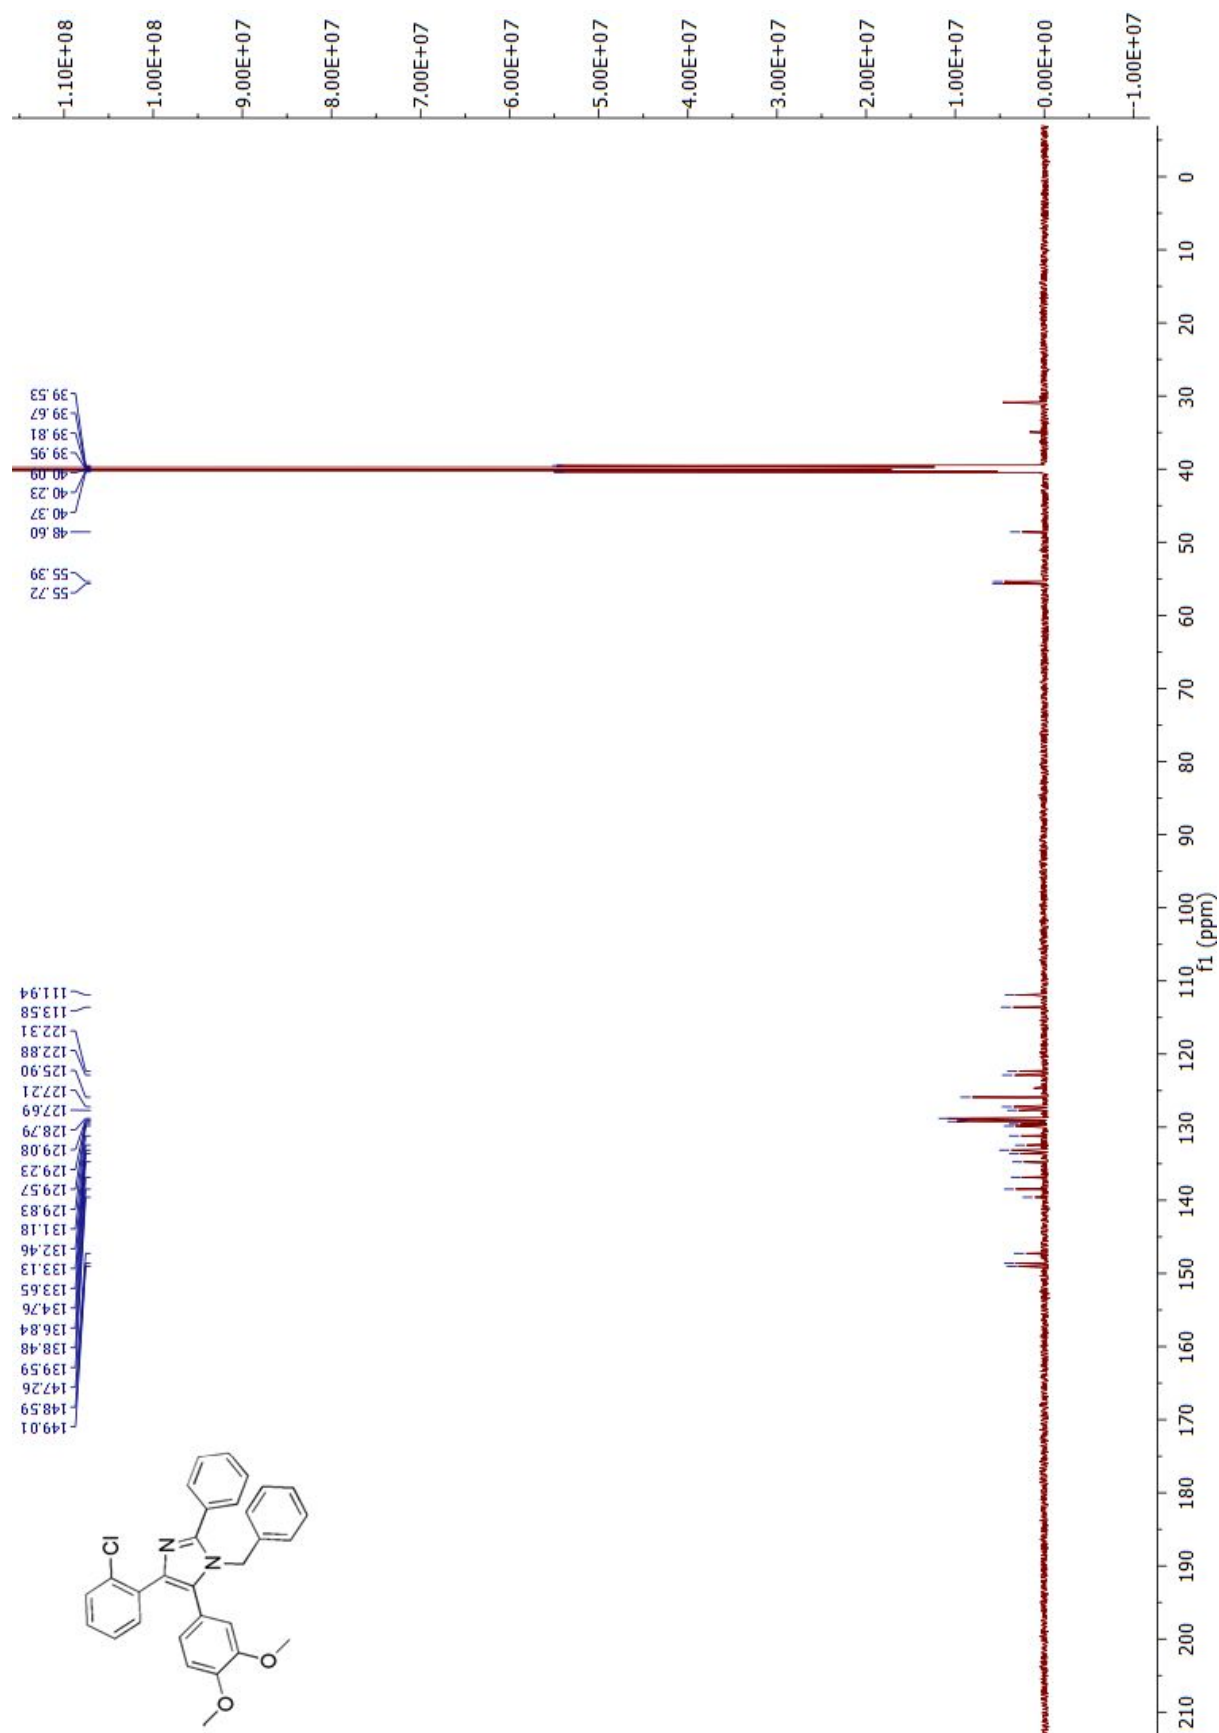

**Figure S35:**  $^1\text{H}$  NMR spectrum of 2-(4-(2-chlorophenyl)-5-(3,4-dimethoxyphenyl)-1-(pyridin-2-ylmethyl)-1H-imidazol-2-yl)pyridine (5d) in  $\text{DMSO-d}_6$ .

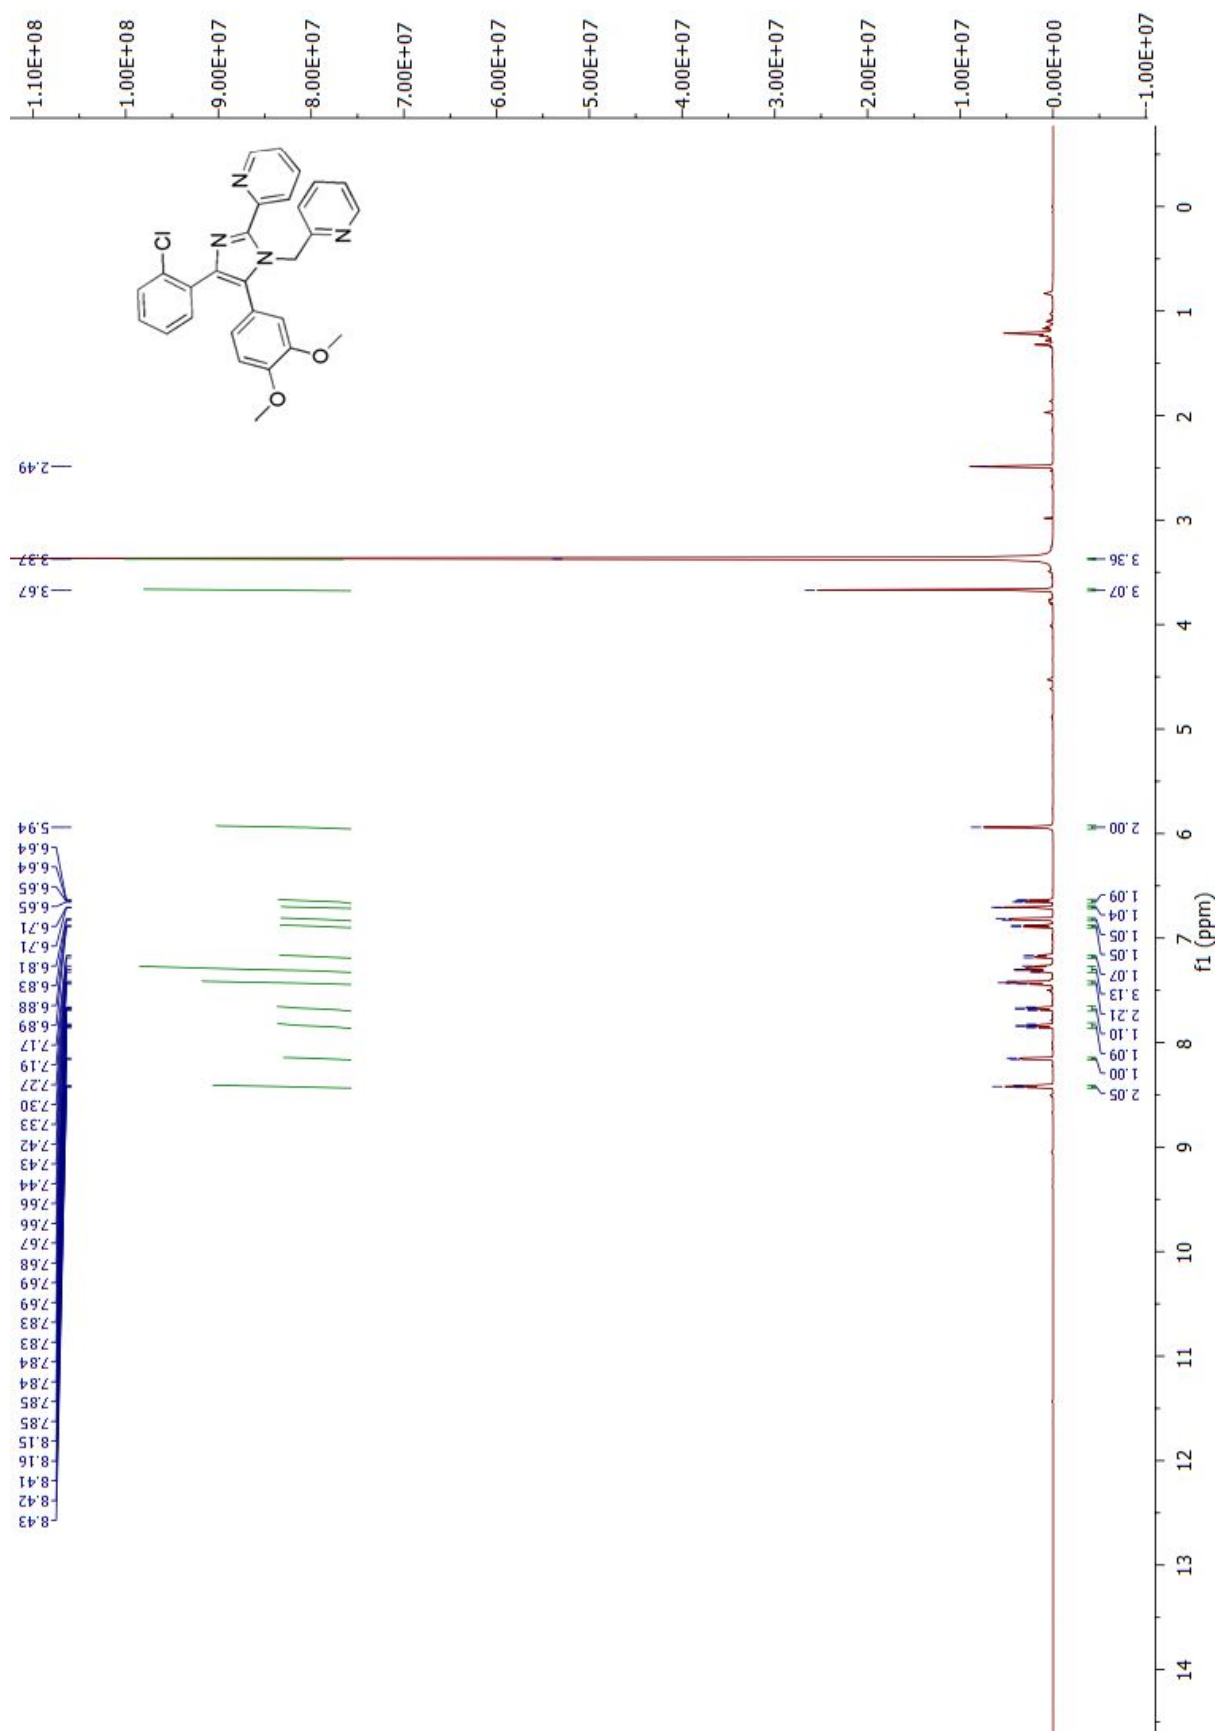

Figure S36:  $^{13}\text{C}$  NMR spectrum of 2-(4-(2-chlorophenyl)-5-(3,4-dimethoxyphenyl)-1-(pyridin-2-ylmethyl)-1H-imidazol-2-yl)pyridine (5d) in  $\text{DMSO-d}_6$ .

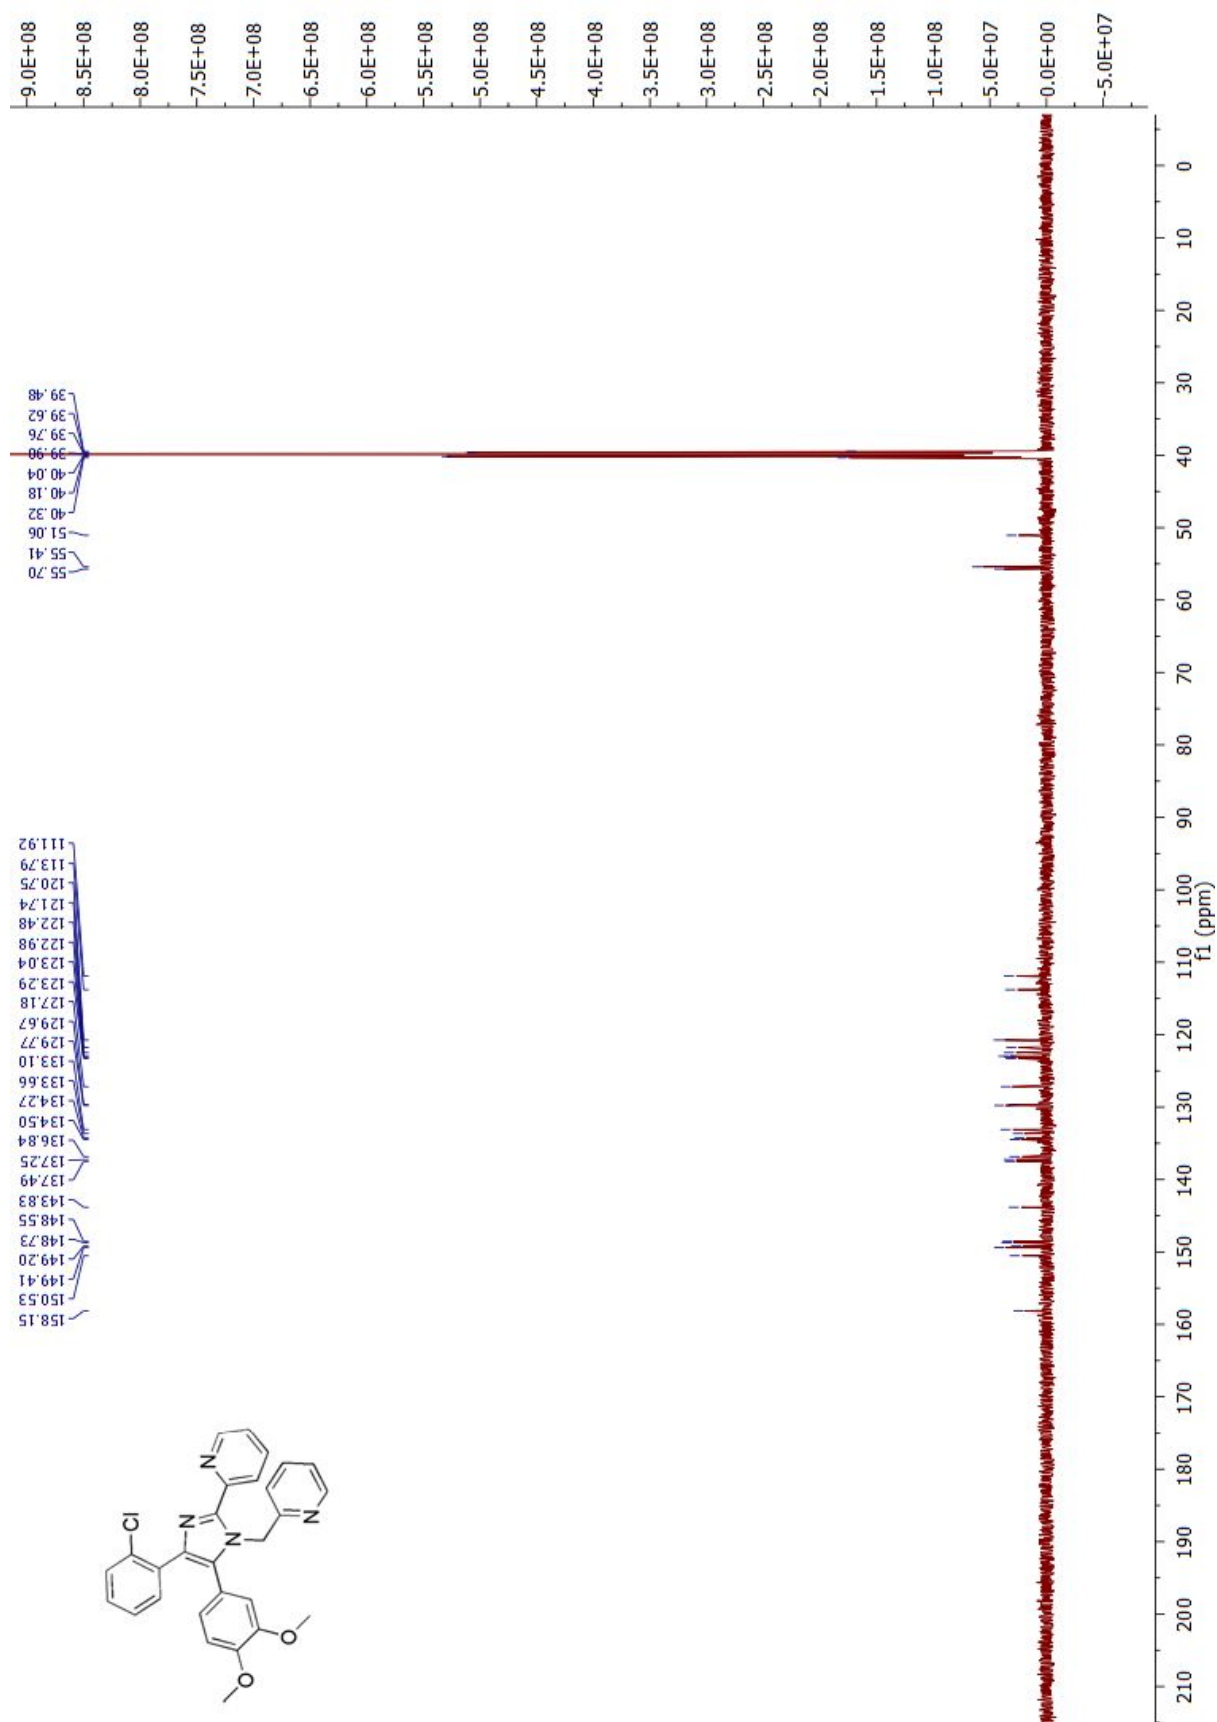

Figure S37:  $^1\text{H}$  NMR spectrum of 2,4,5-Triphenyl-1H-imidazole (8a) in  $\text{DMSO-d}_6$ .

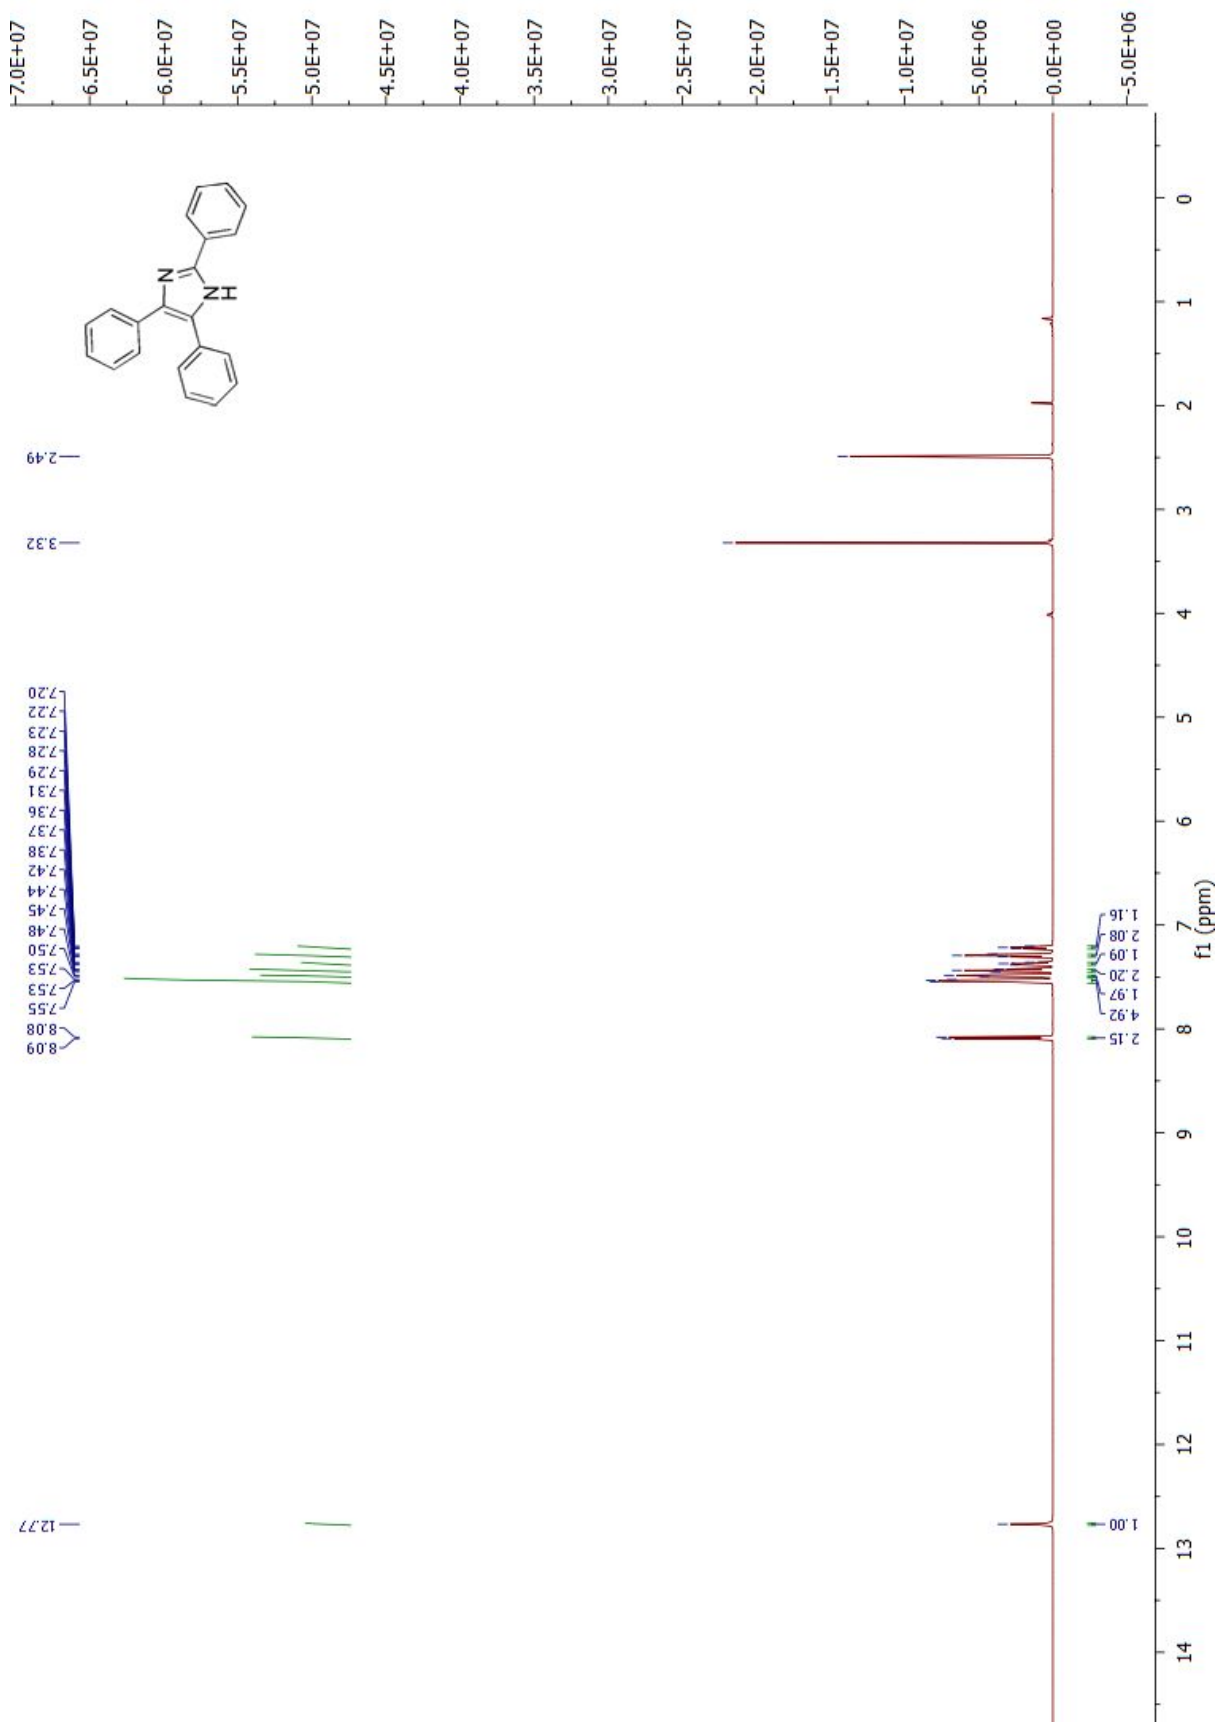

Figure S38:  $^{13}\text{C}$  NMR spectrum of 2,4,5-Triphenyl-1H-imidazole(8a) in  $\text{DMSO-d}_6$ .

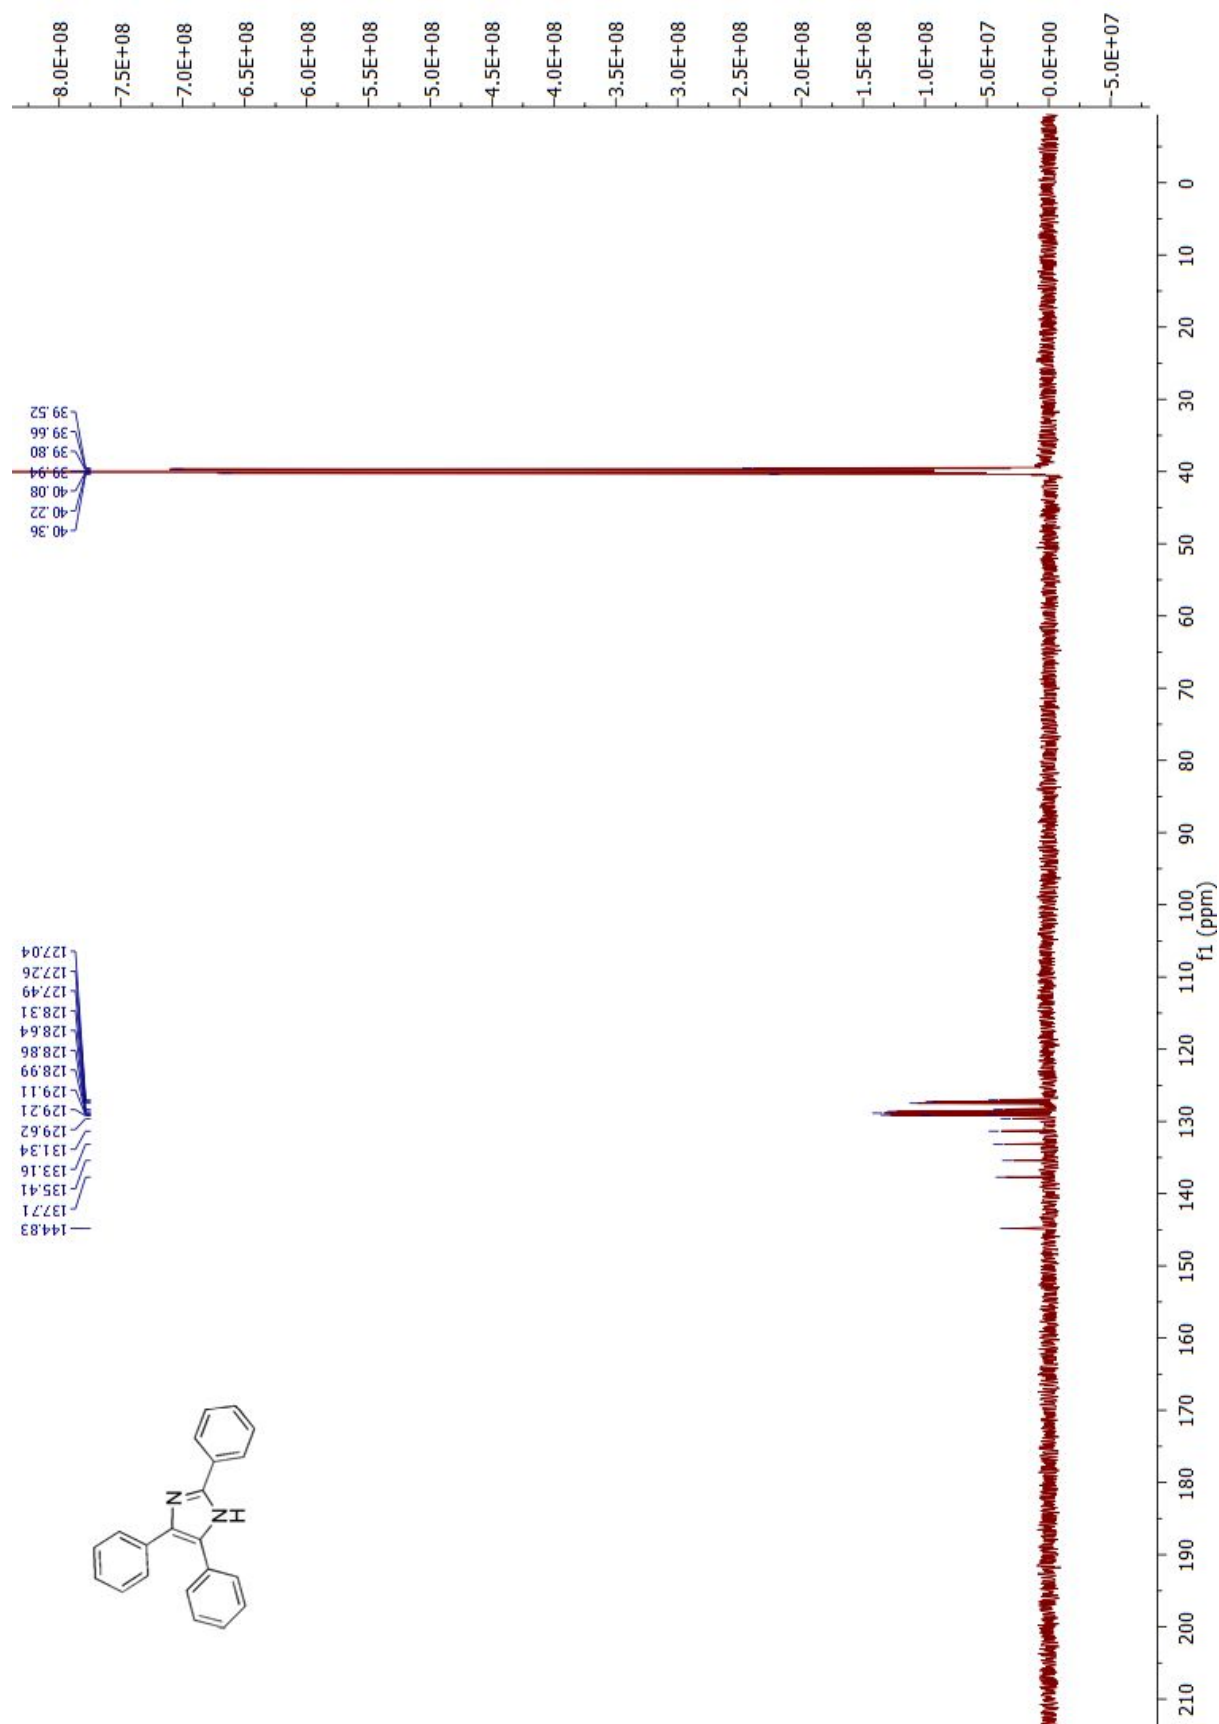



Figure S39:  $^1\text{H}$  NMR spectrum of 2-(4-Chloro-phenyl)-4,5-diphenyl-1H-imidazole (8b) in  $\text{DMSO-d}_6$ .

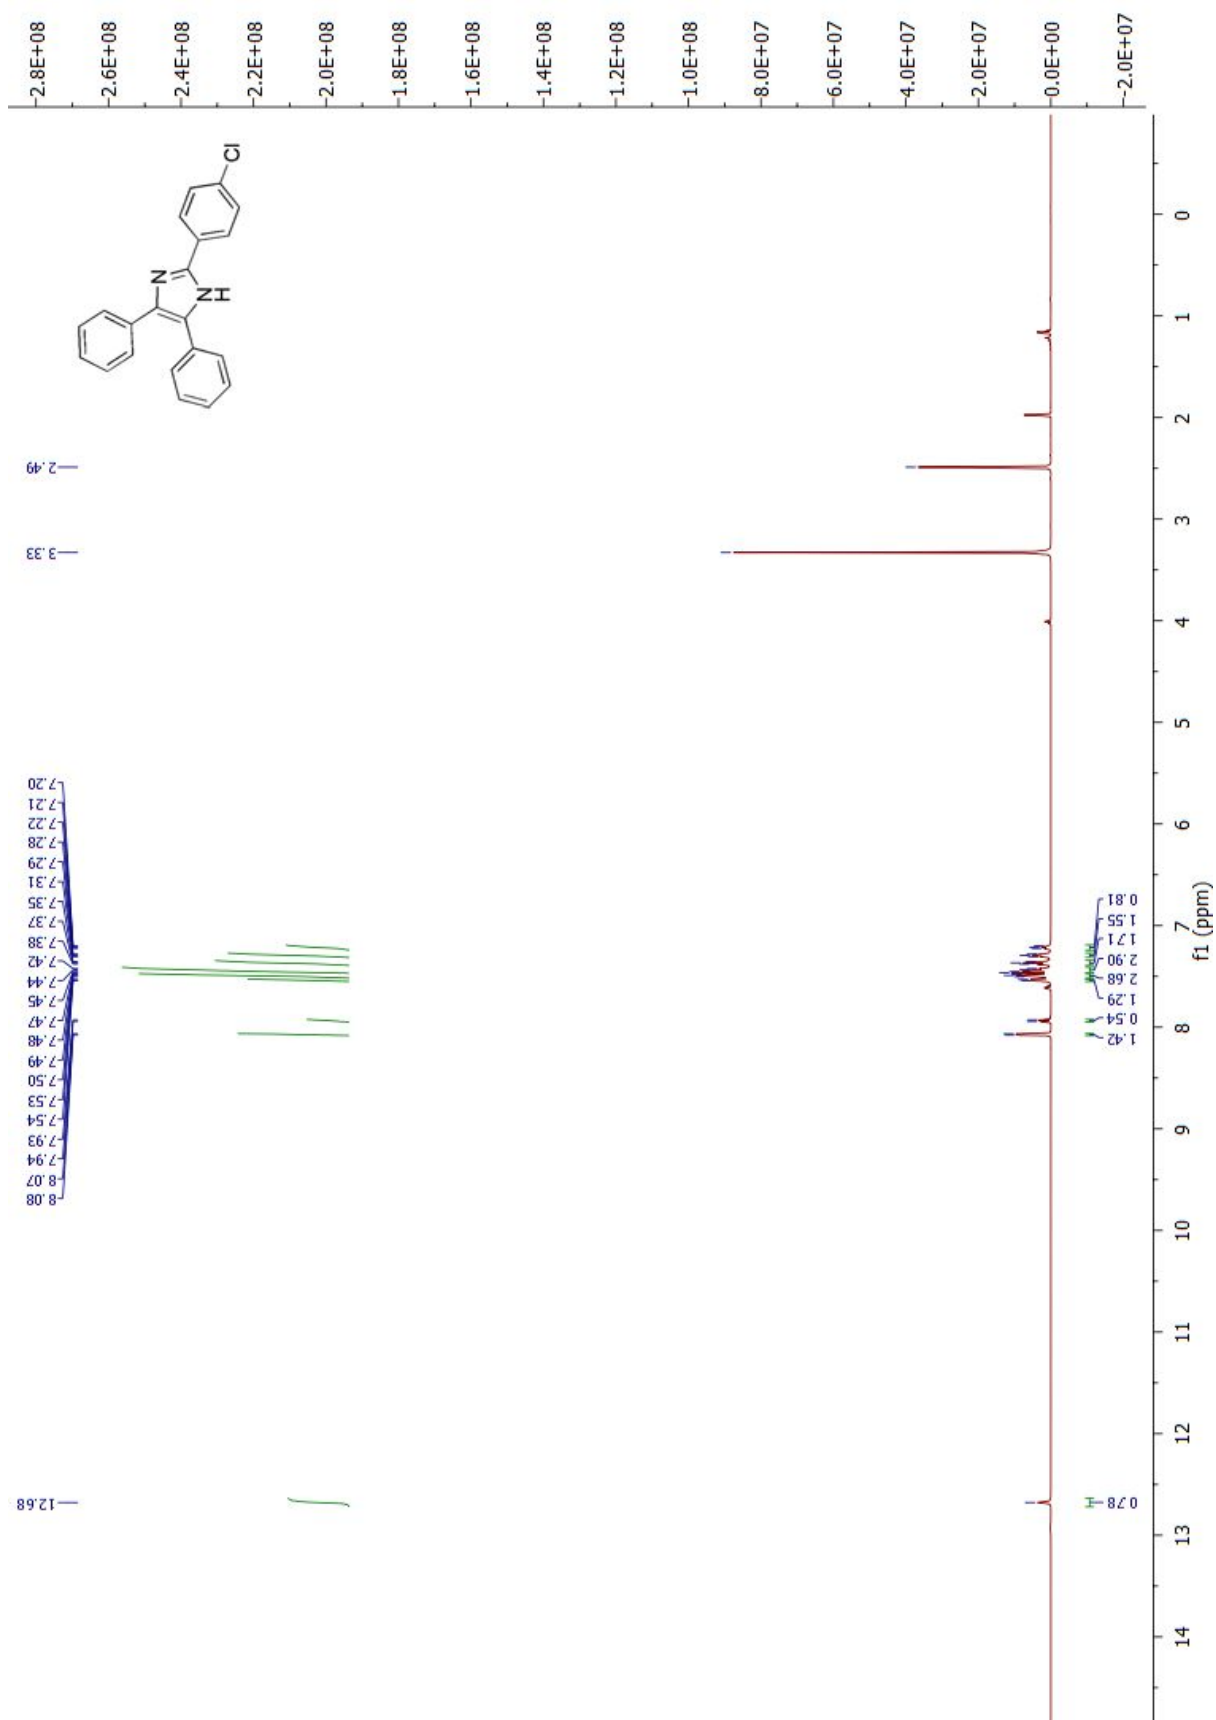

Figure S40:  $^{13}\text{C}$  NMR spectrum of 2-(4-Chloro-phenyl)-4,5-diphenyl-1H-imidazole (8b) in  $\text{DMSO-d}_6$ .

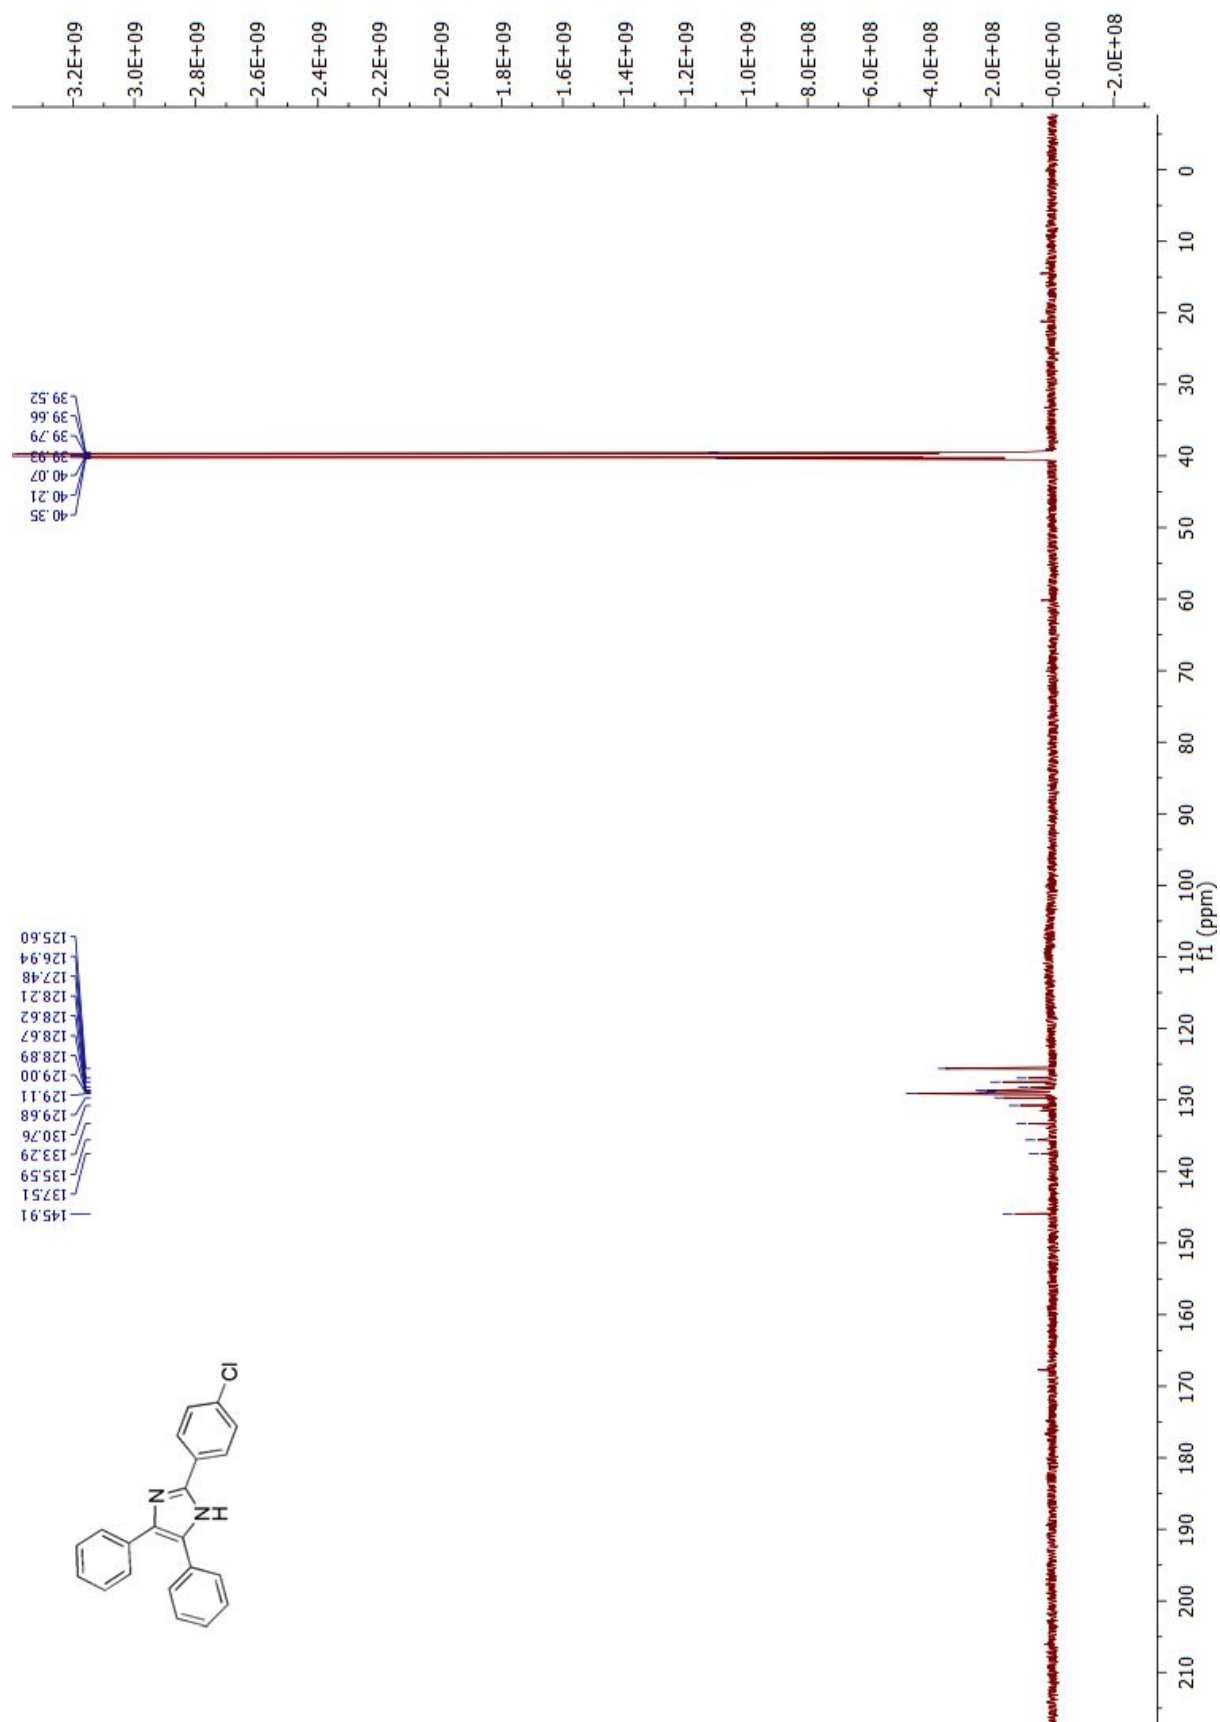

Figure S41:  $^1\text{H}$  NMR spectrum of 2-(4,5-Diphenyl-1H-imidazol-2-yl)-phenol (**8c**) in  $\text{DMSO-d}_6$ .

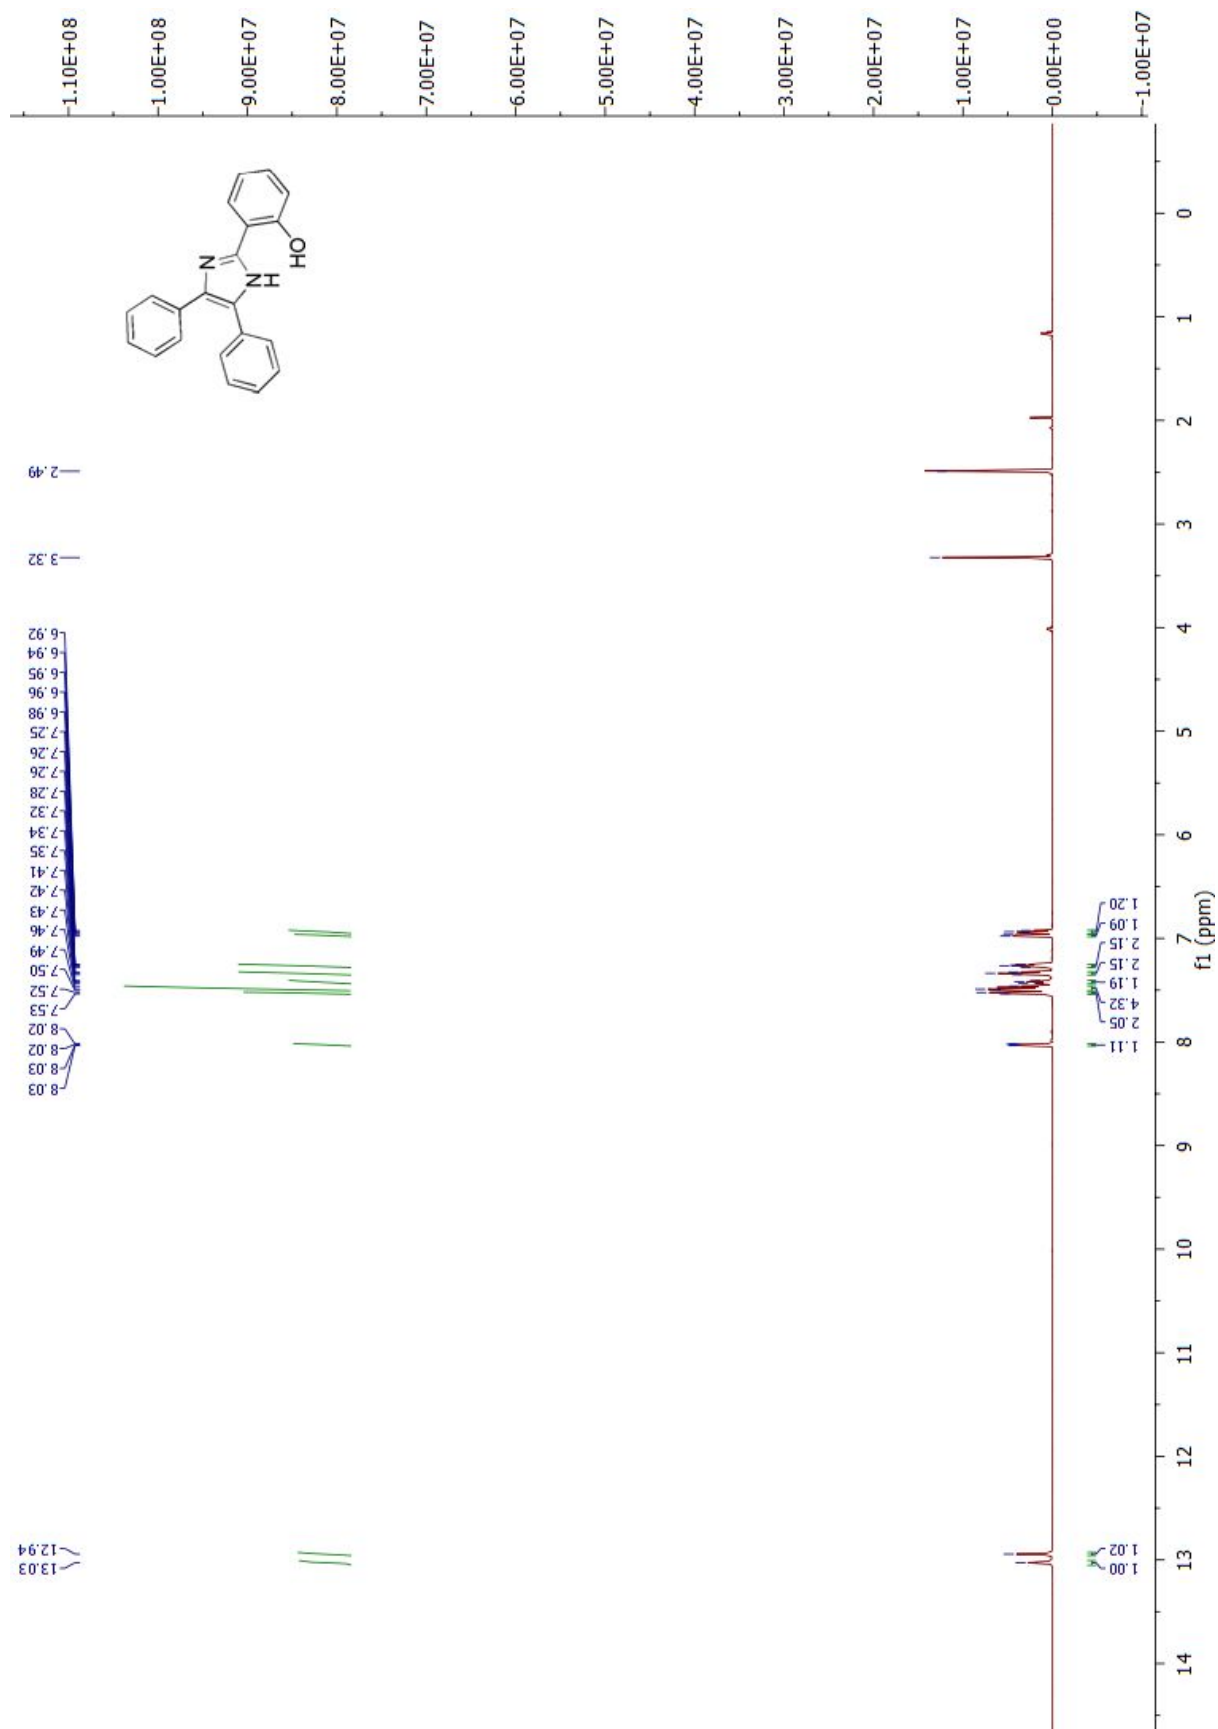

Figure S42:  $^{13}\text{C}$  NMR spectrum of 2-(4,5-Diphenyl-1H-imidazol-2-yl)-phenol (**8c**) in  $\text{DMSO-d}_6$ :

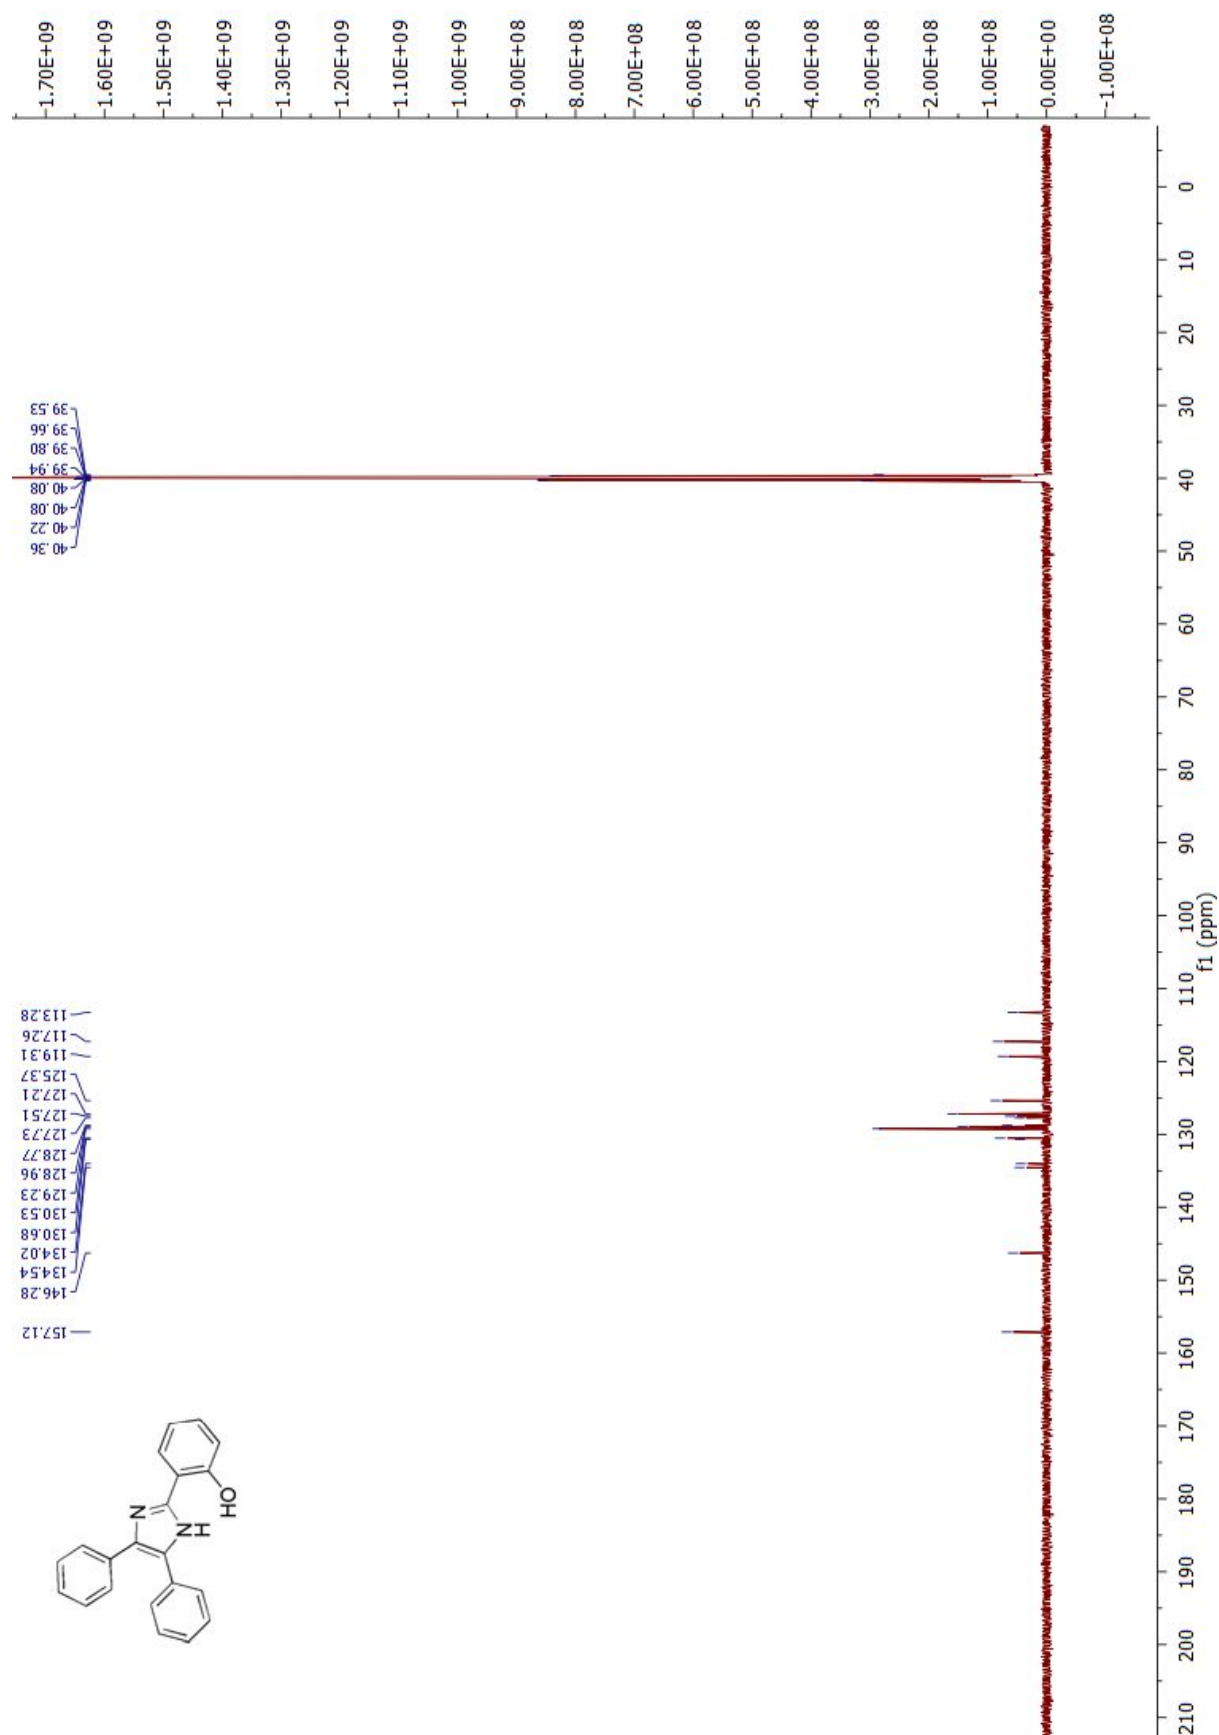

Figure S43: <sup>1</sup>H NMR spectrum of 4,5-Diphenyl-2-thiophen-2-yl-1H-imidazole (8d) in DMSO-d<sub>6</sub>.

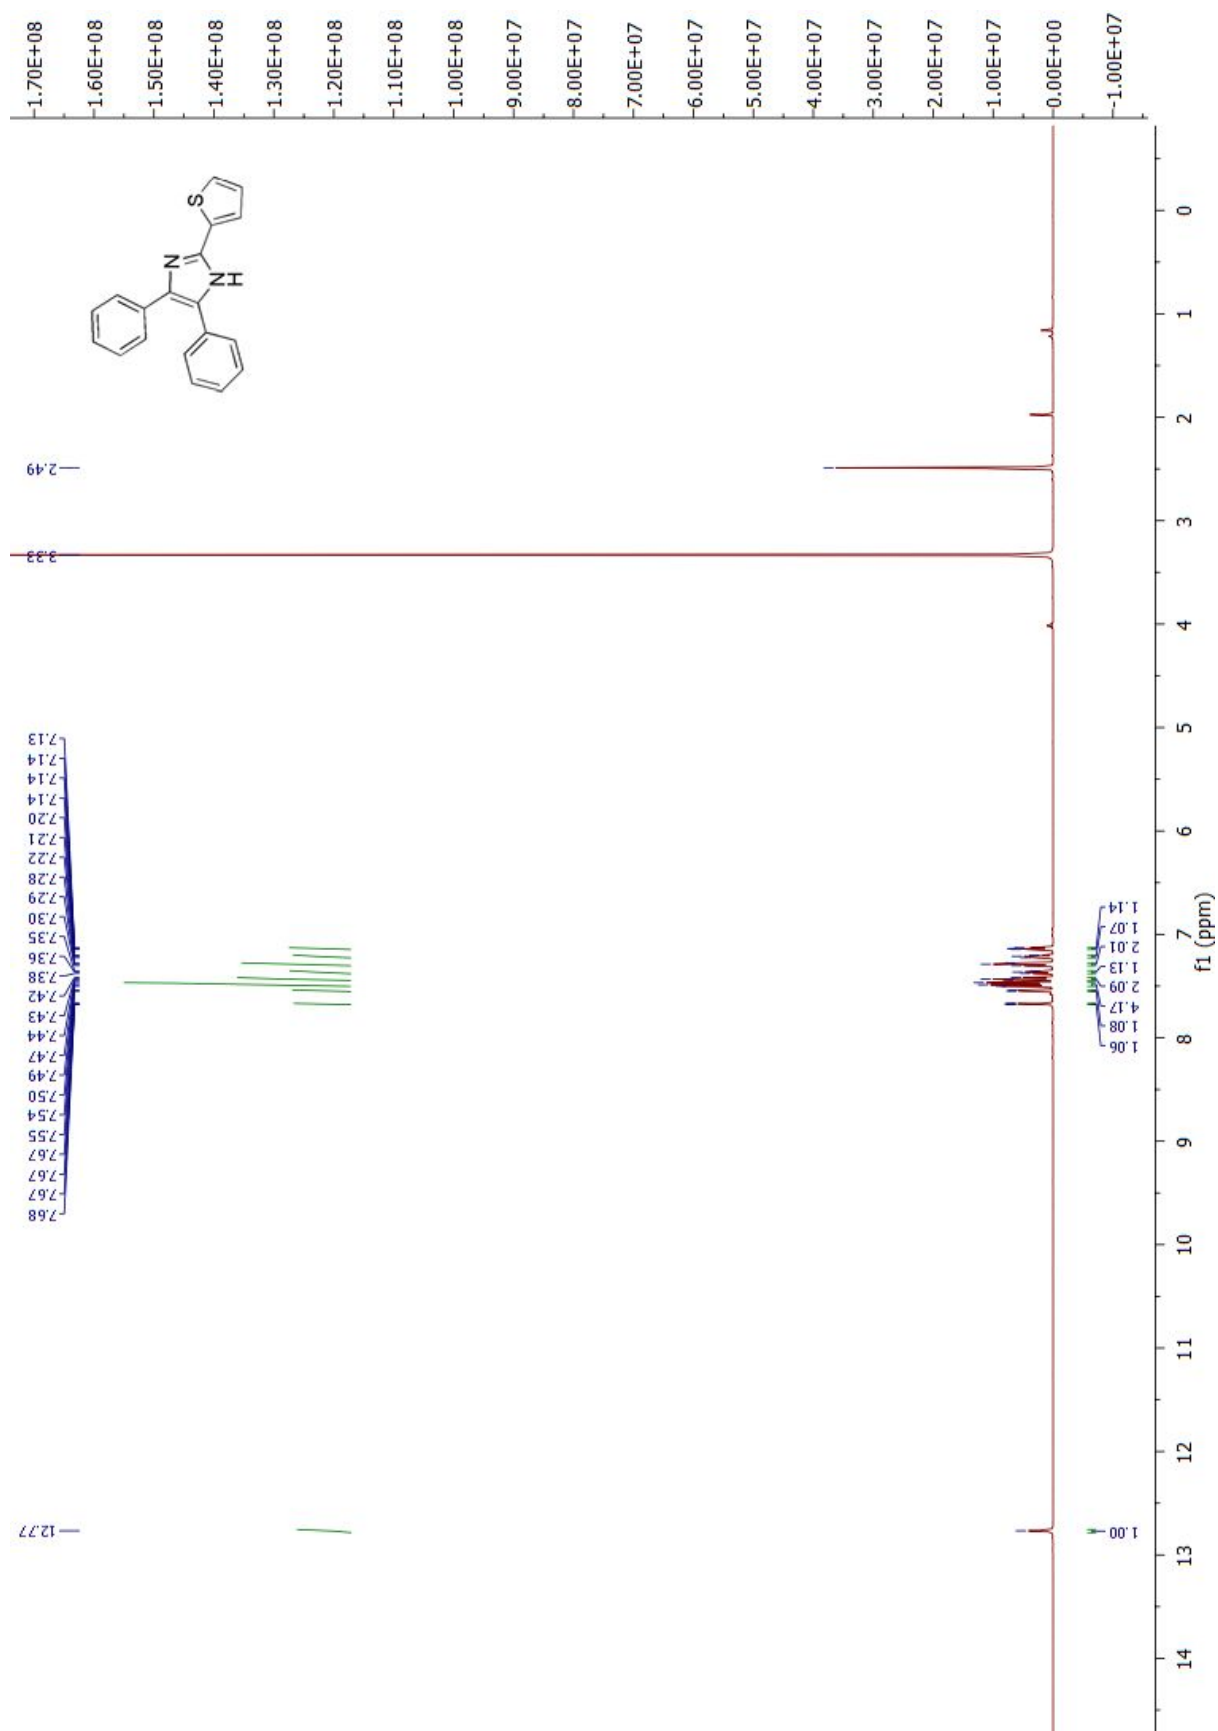

Figure S44:  $^{13}\text{C}$  NMR spectrum of 4,5-Diphenyl-2-thiophen-2-yl-1H-imidazole (8d) in  $\text{DMSO-d}_6$ .

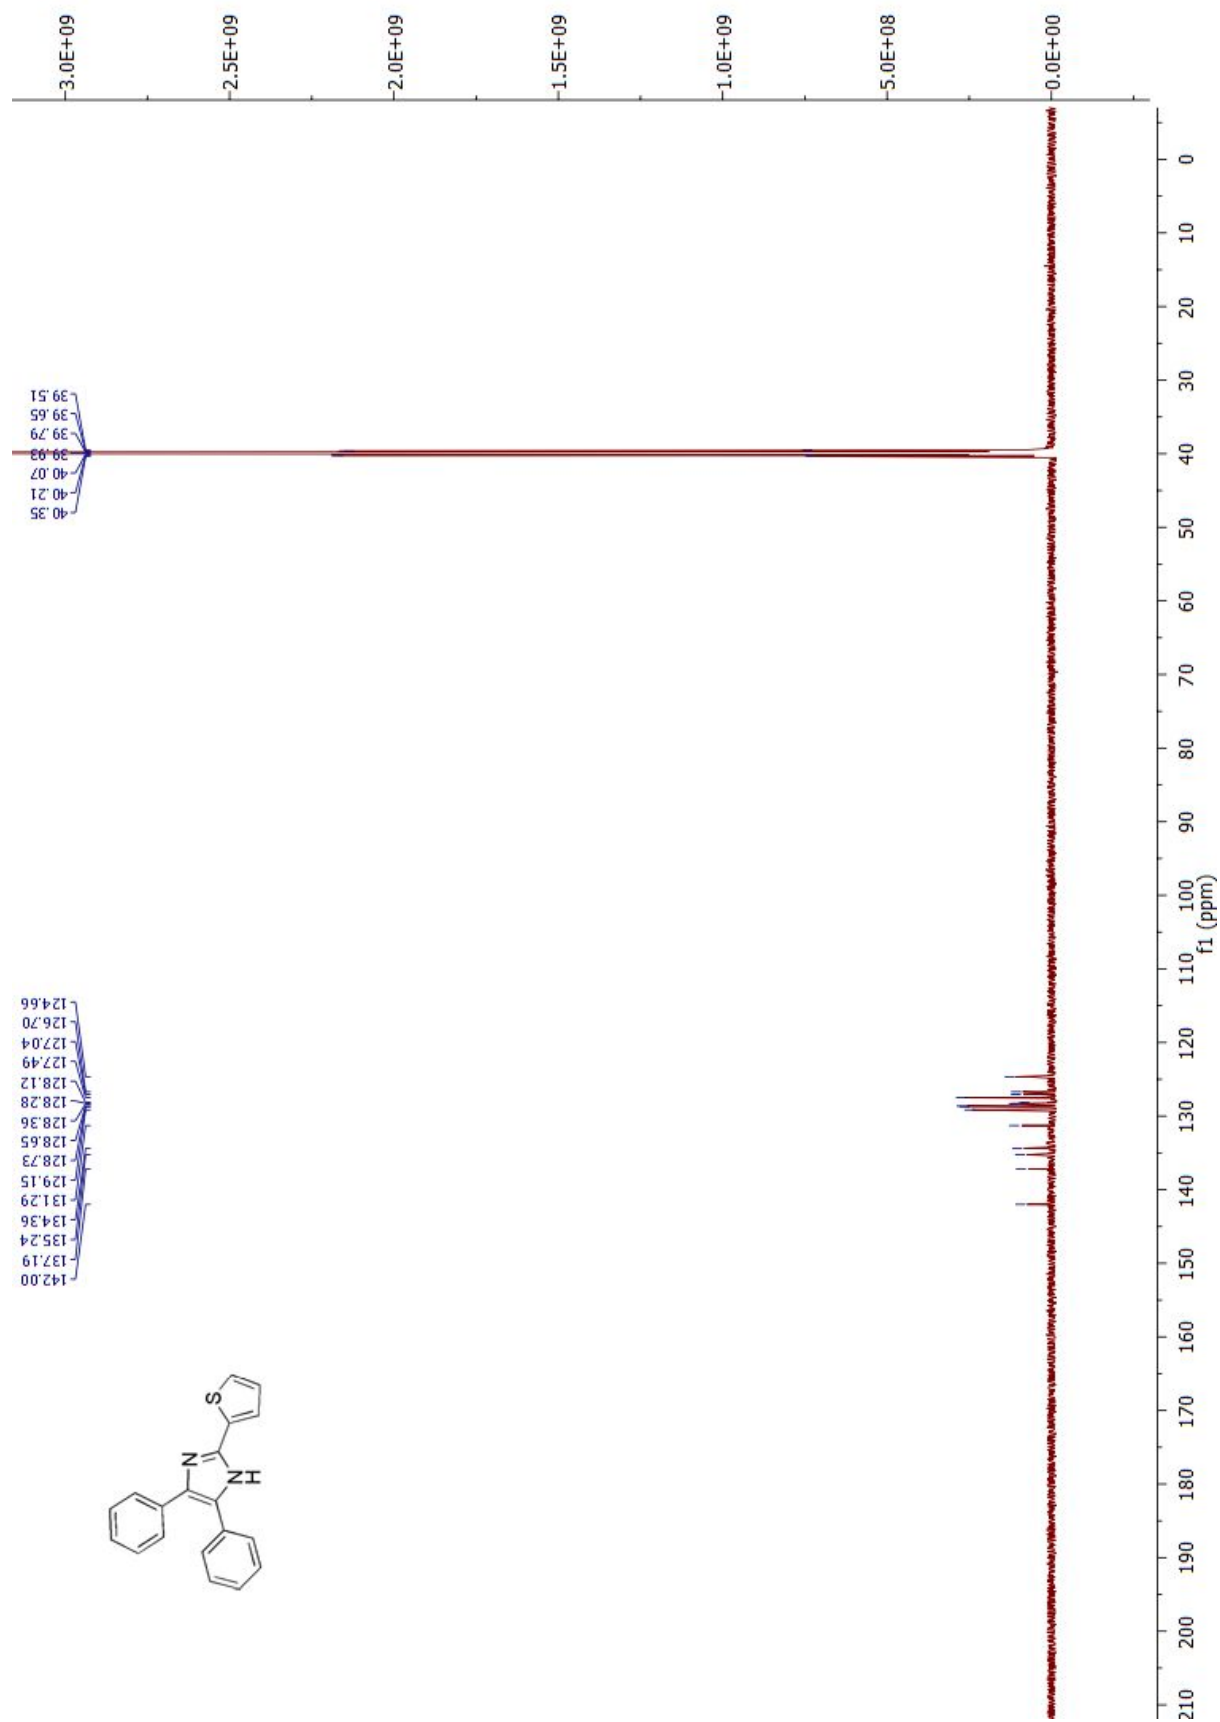

Figure S45:  $^1\text{H}$  NMR spectrum of 2-(4,5-Diphenyl-1H-imidazol-2-yl)-pyridine (8e) in  $\text{DMSO-d}_6$ .

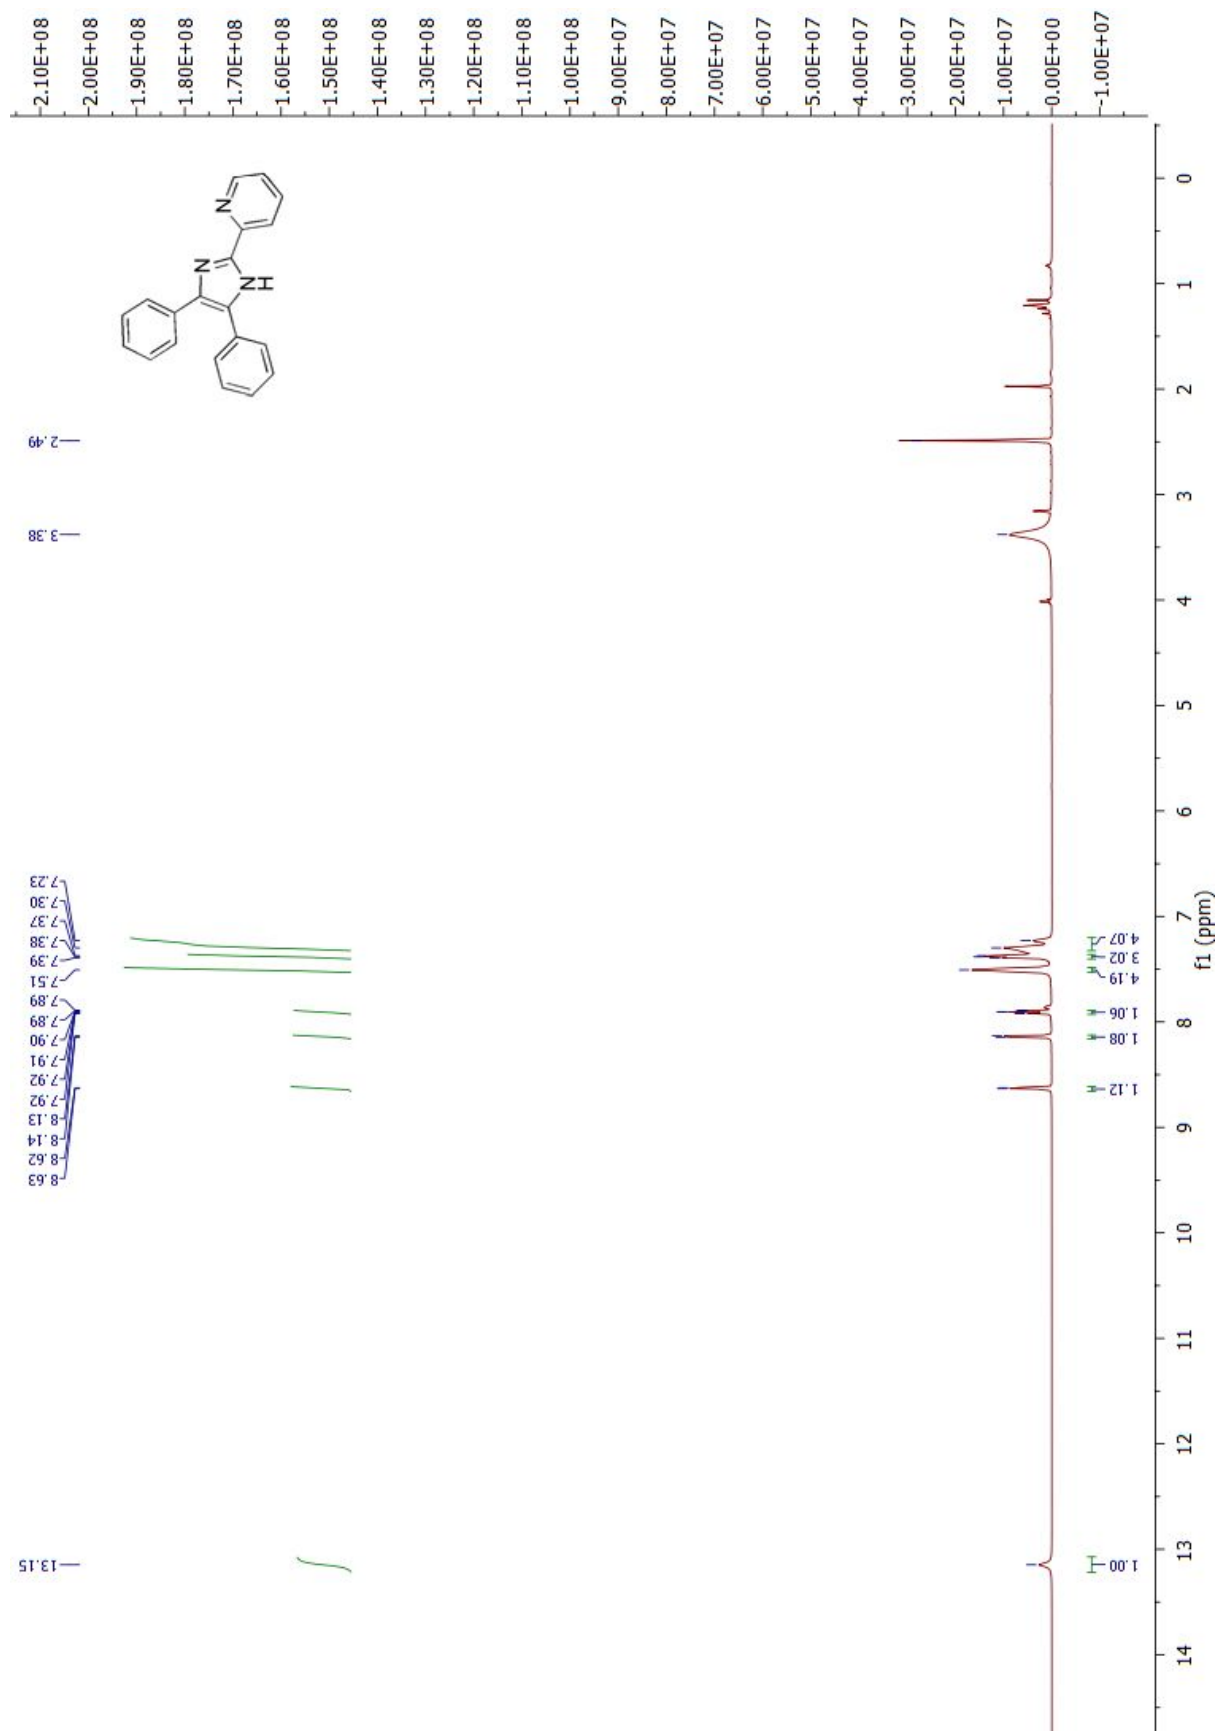

Figure S46:  $^{13}\text{C}$  NMR spectrum of 2-(4,5-Diphenyl-1H-imidazol-2-yl)-pyridine (8e) in  $\text{DMSO-d}_6$ .

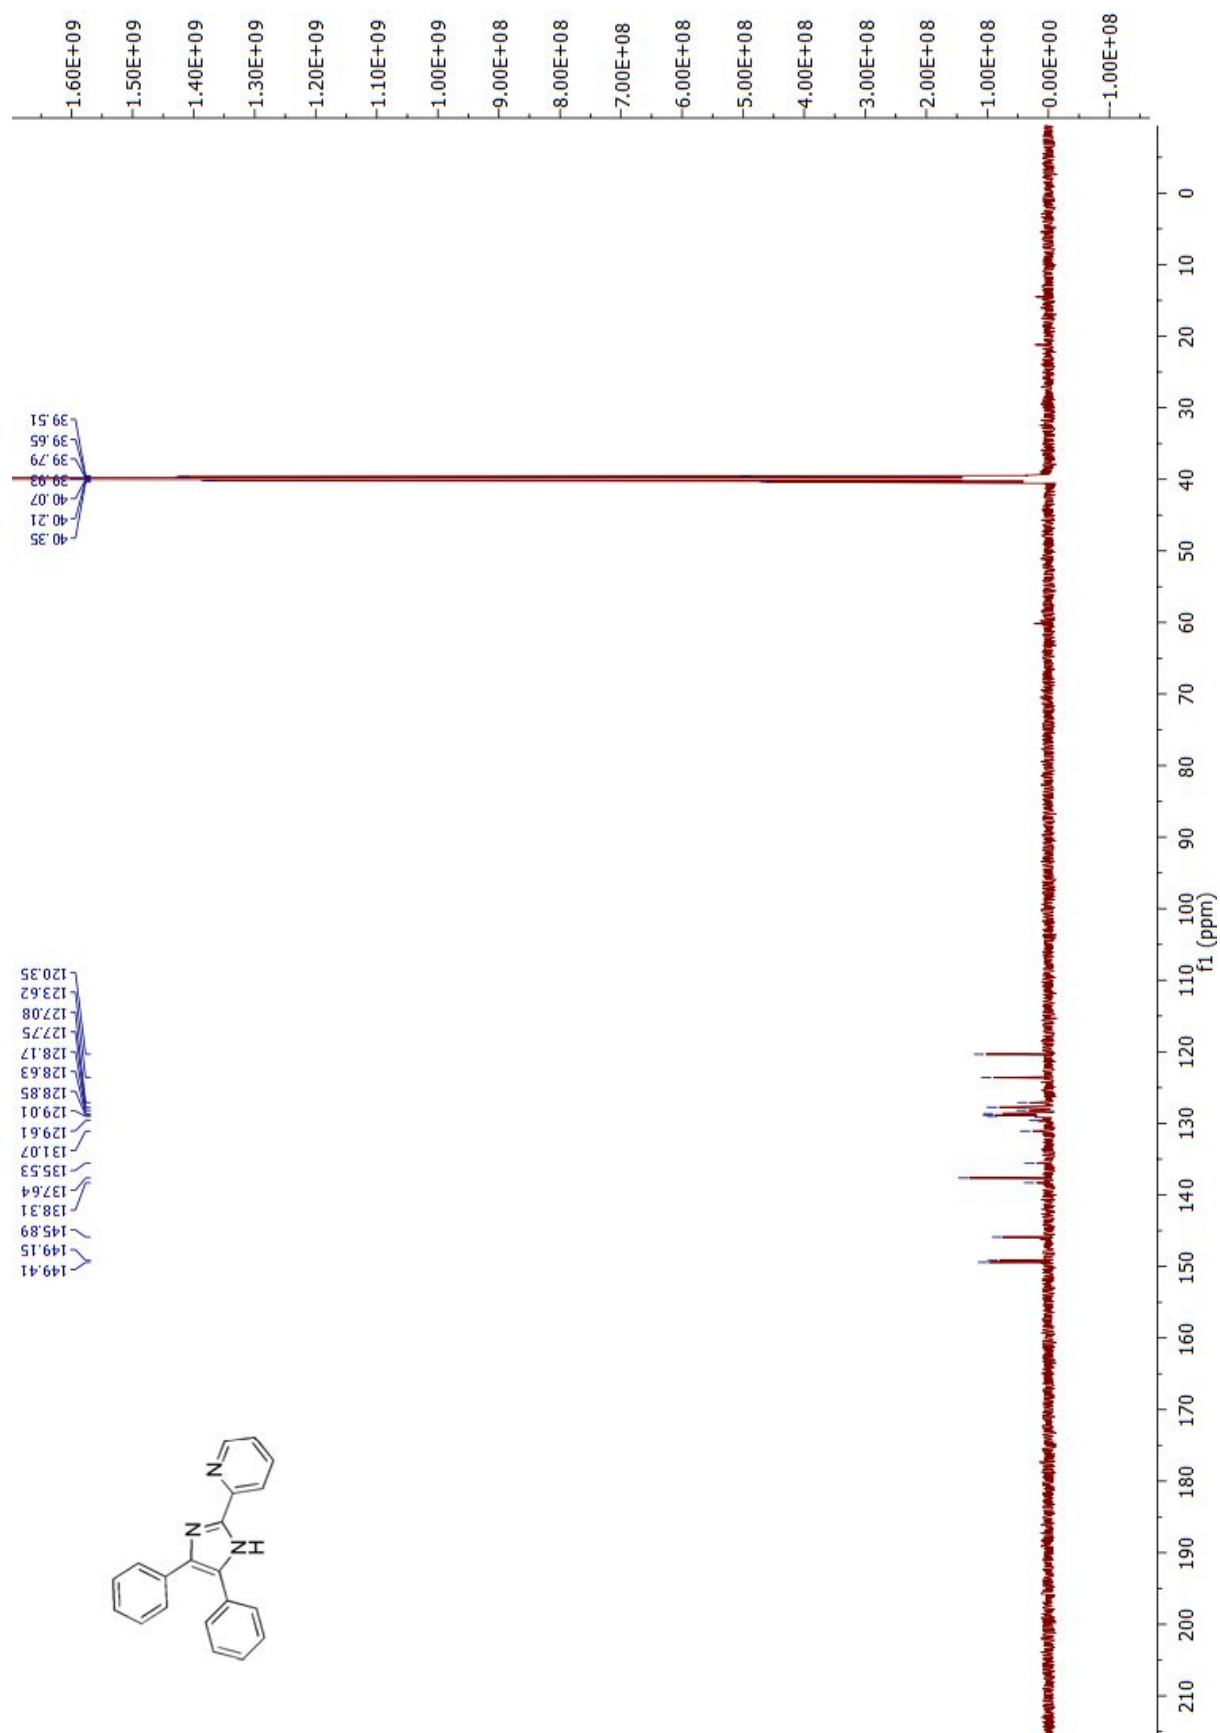



**Figure S47:**  $^1\text{H}$  NMR spectrum of [4-(4,5-Diphenyl-1H-imidazol-2-yl)-phenyl]-dimethylamine (8f) in  $\text{DMSO-d}_6$ .

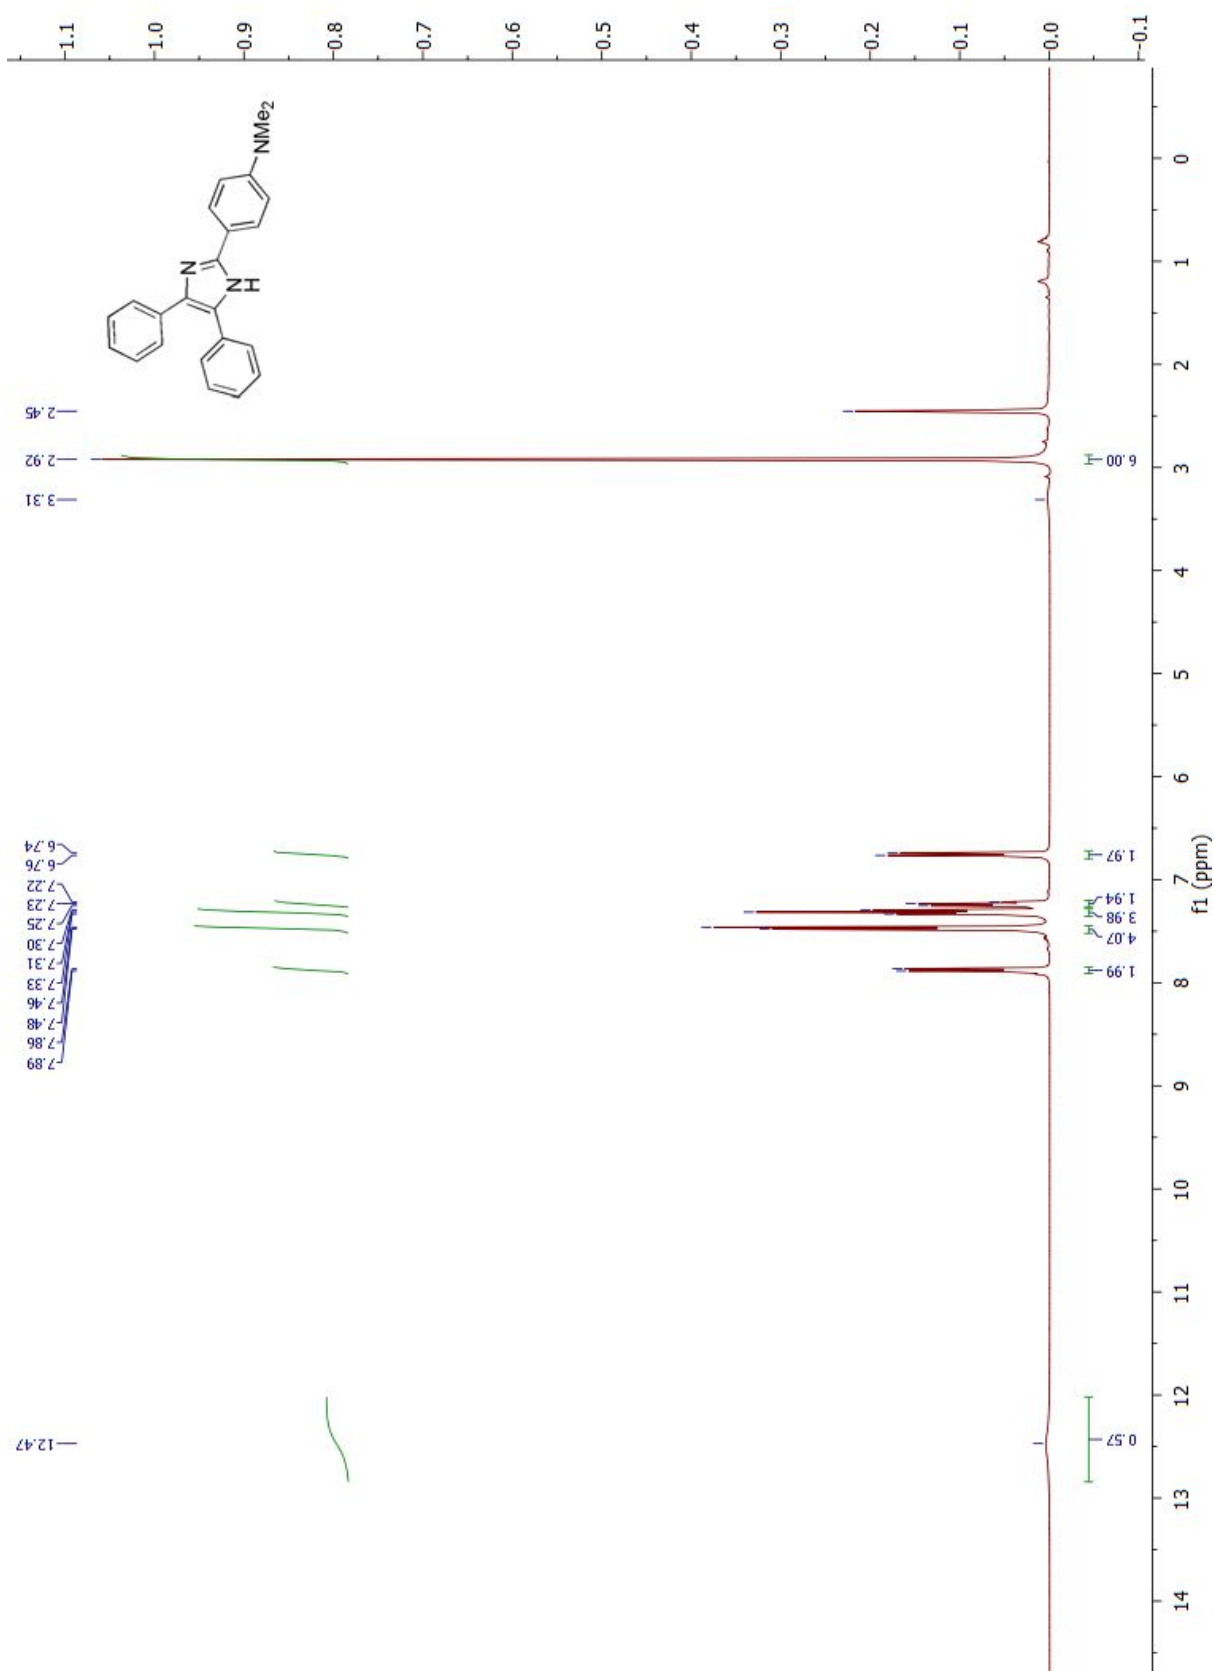

Figure S48:  $^{13}\text{C}$  NMR spectrum of [4-(4,5-Diphenyl-1H-imidazol-2-yl)-phenyl]-dimethyl-amine (8f) in  $\text{DMSO-d}_6$ .

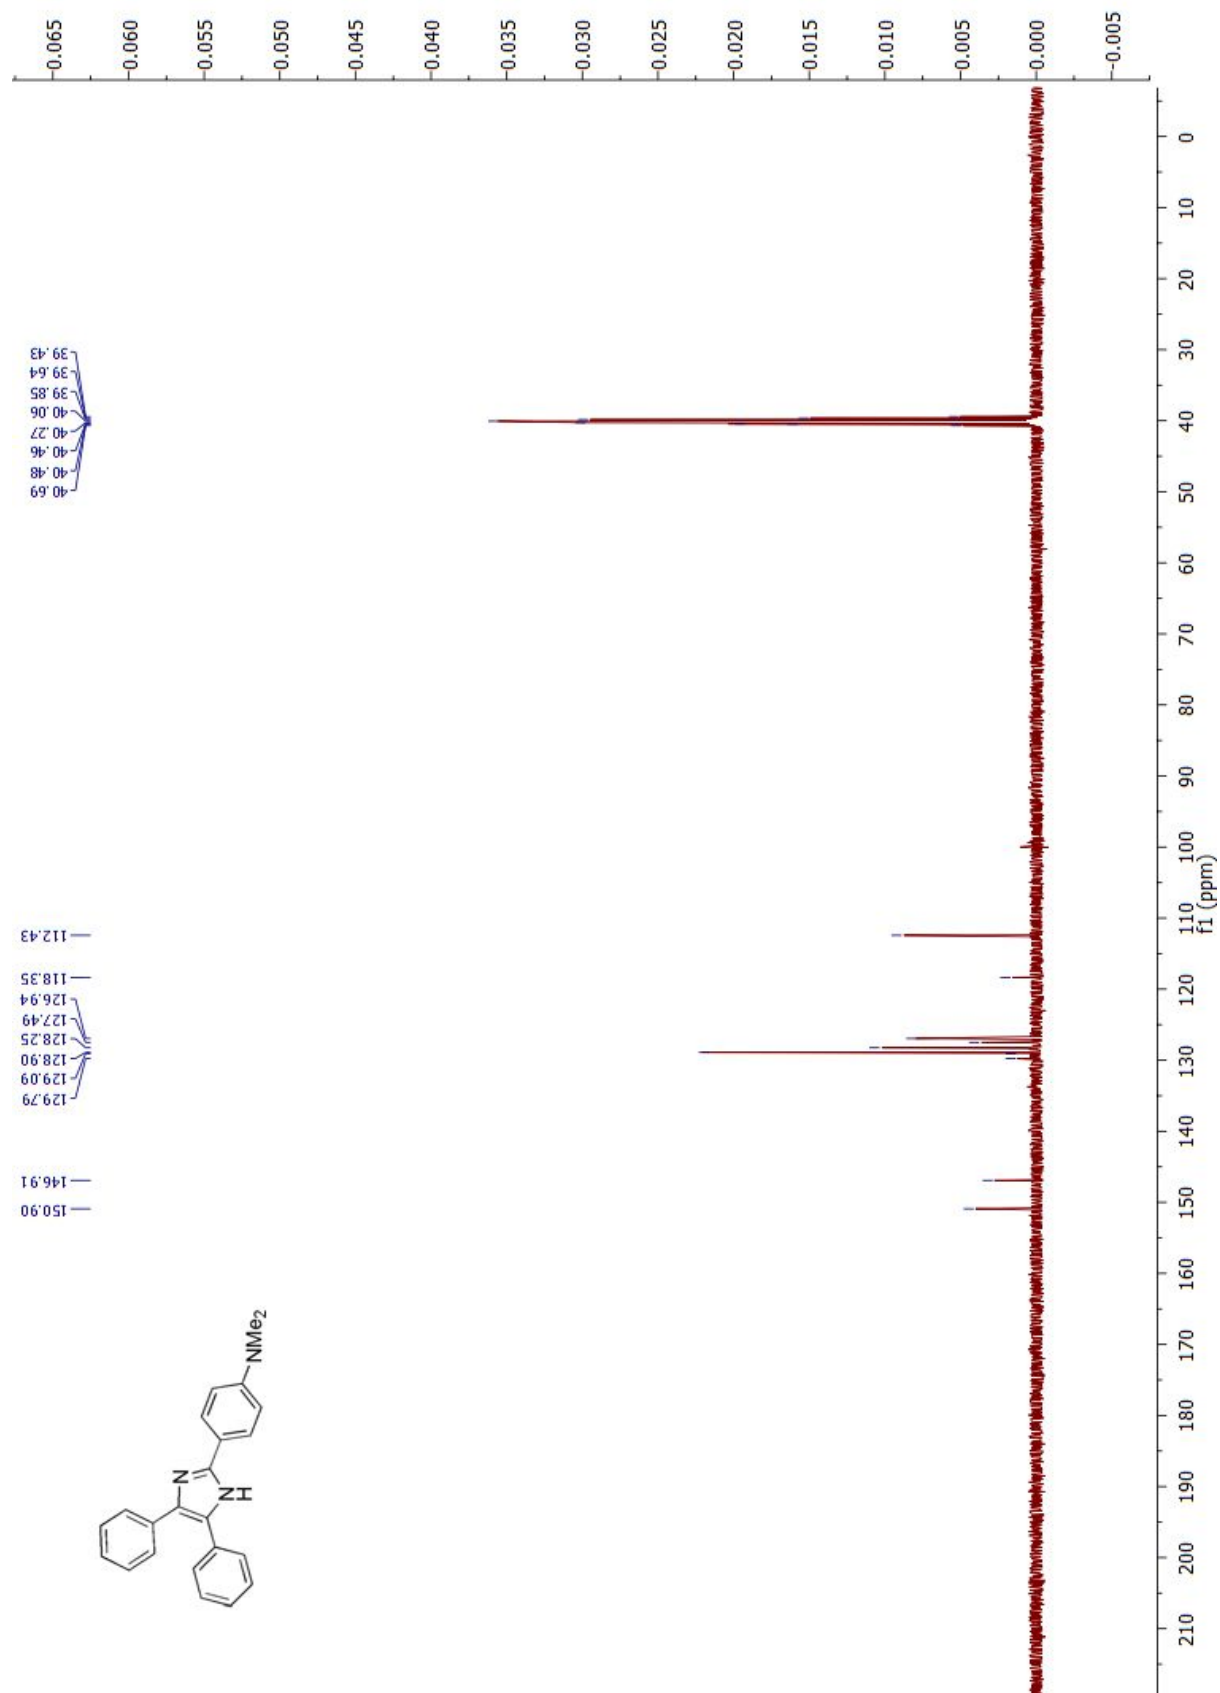

**Figure S49:  $^1\text{H}$  NMR spectrum of 2-[4,5-Bis-(4-methoxy-phenyl)-1H-imidazol-2-yl]-pyridine (8g) in  $\text{DMSO-d}_6$ .**

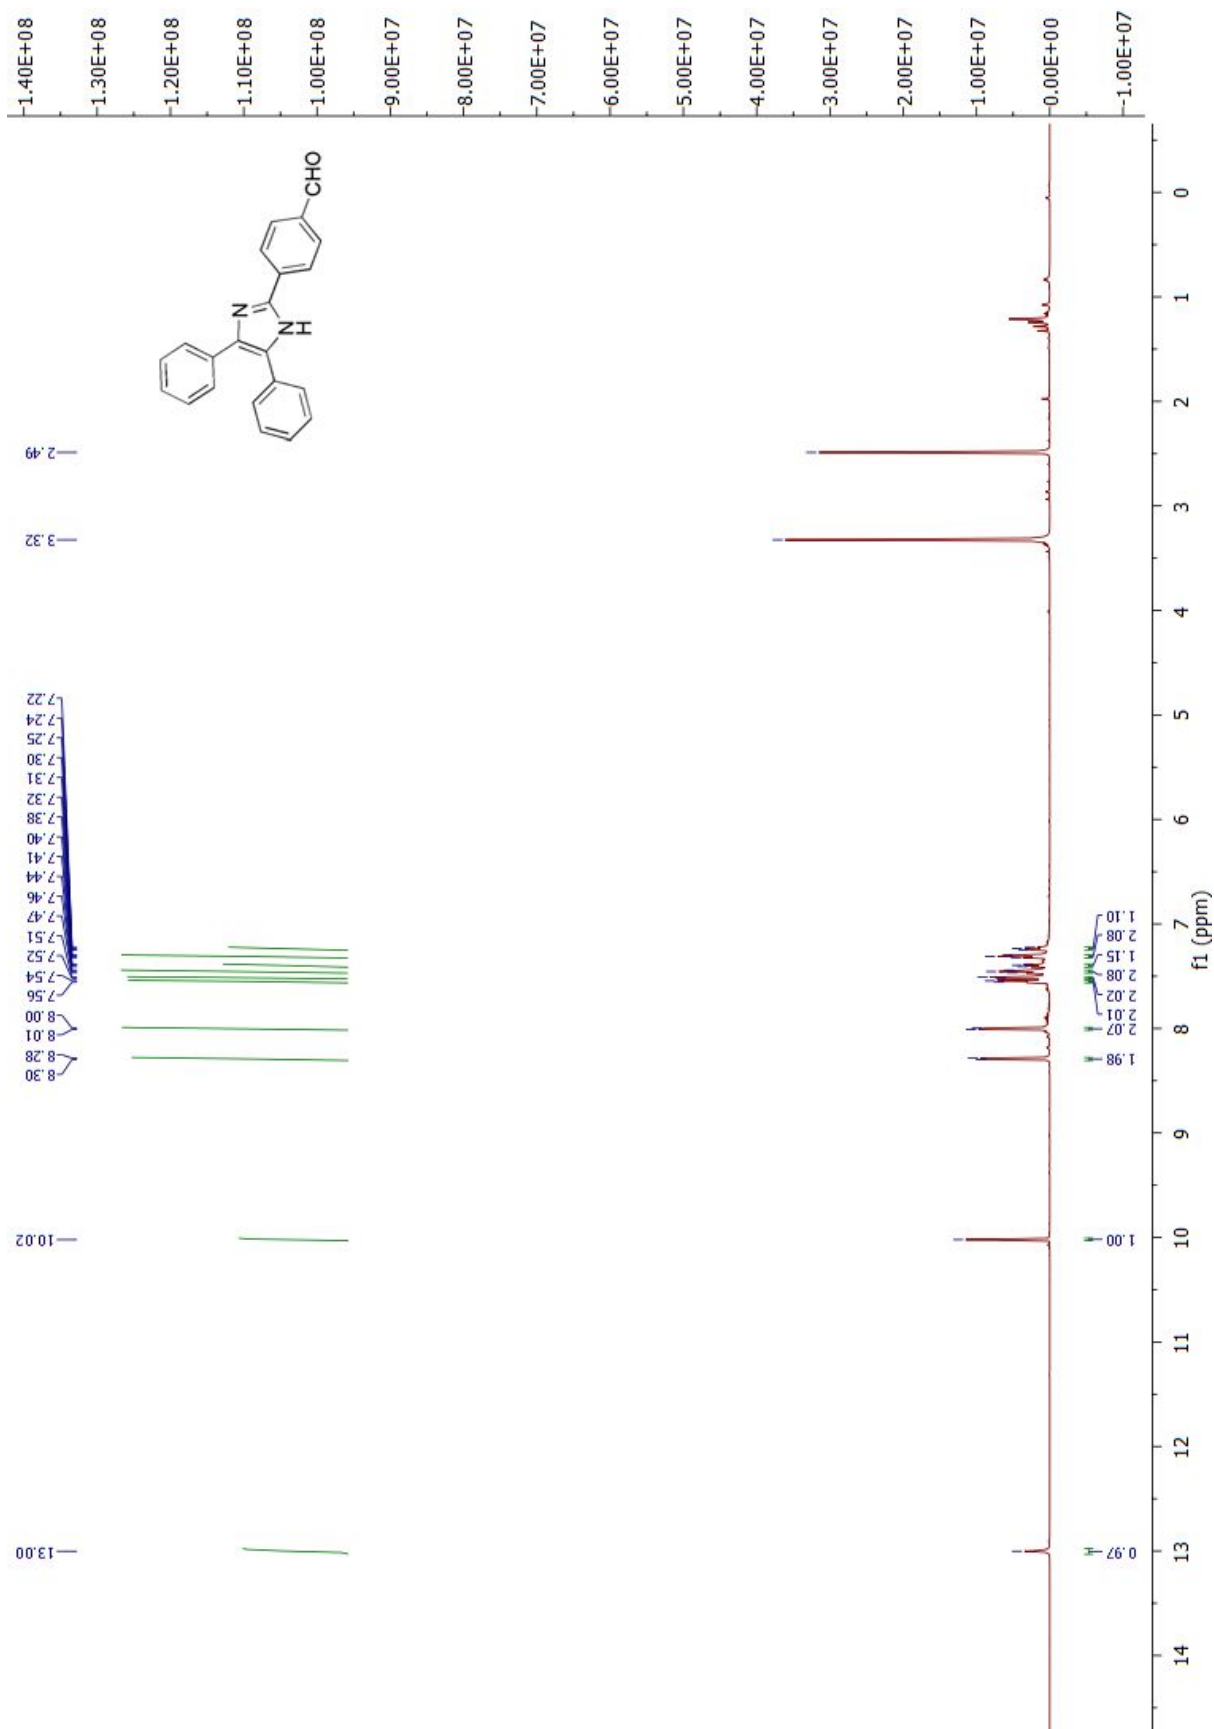

Figure S50:  $^{13}\text{C}$  NMR spectrum of 2-[4,5-Bis-(4-methoxy-phenyl)-1H-imidazol-2-yl]-pyridine (8g) in  $\text{DMSO-d}_6$ .

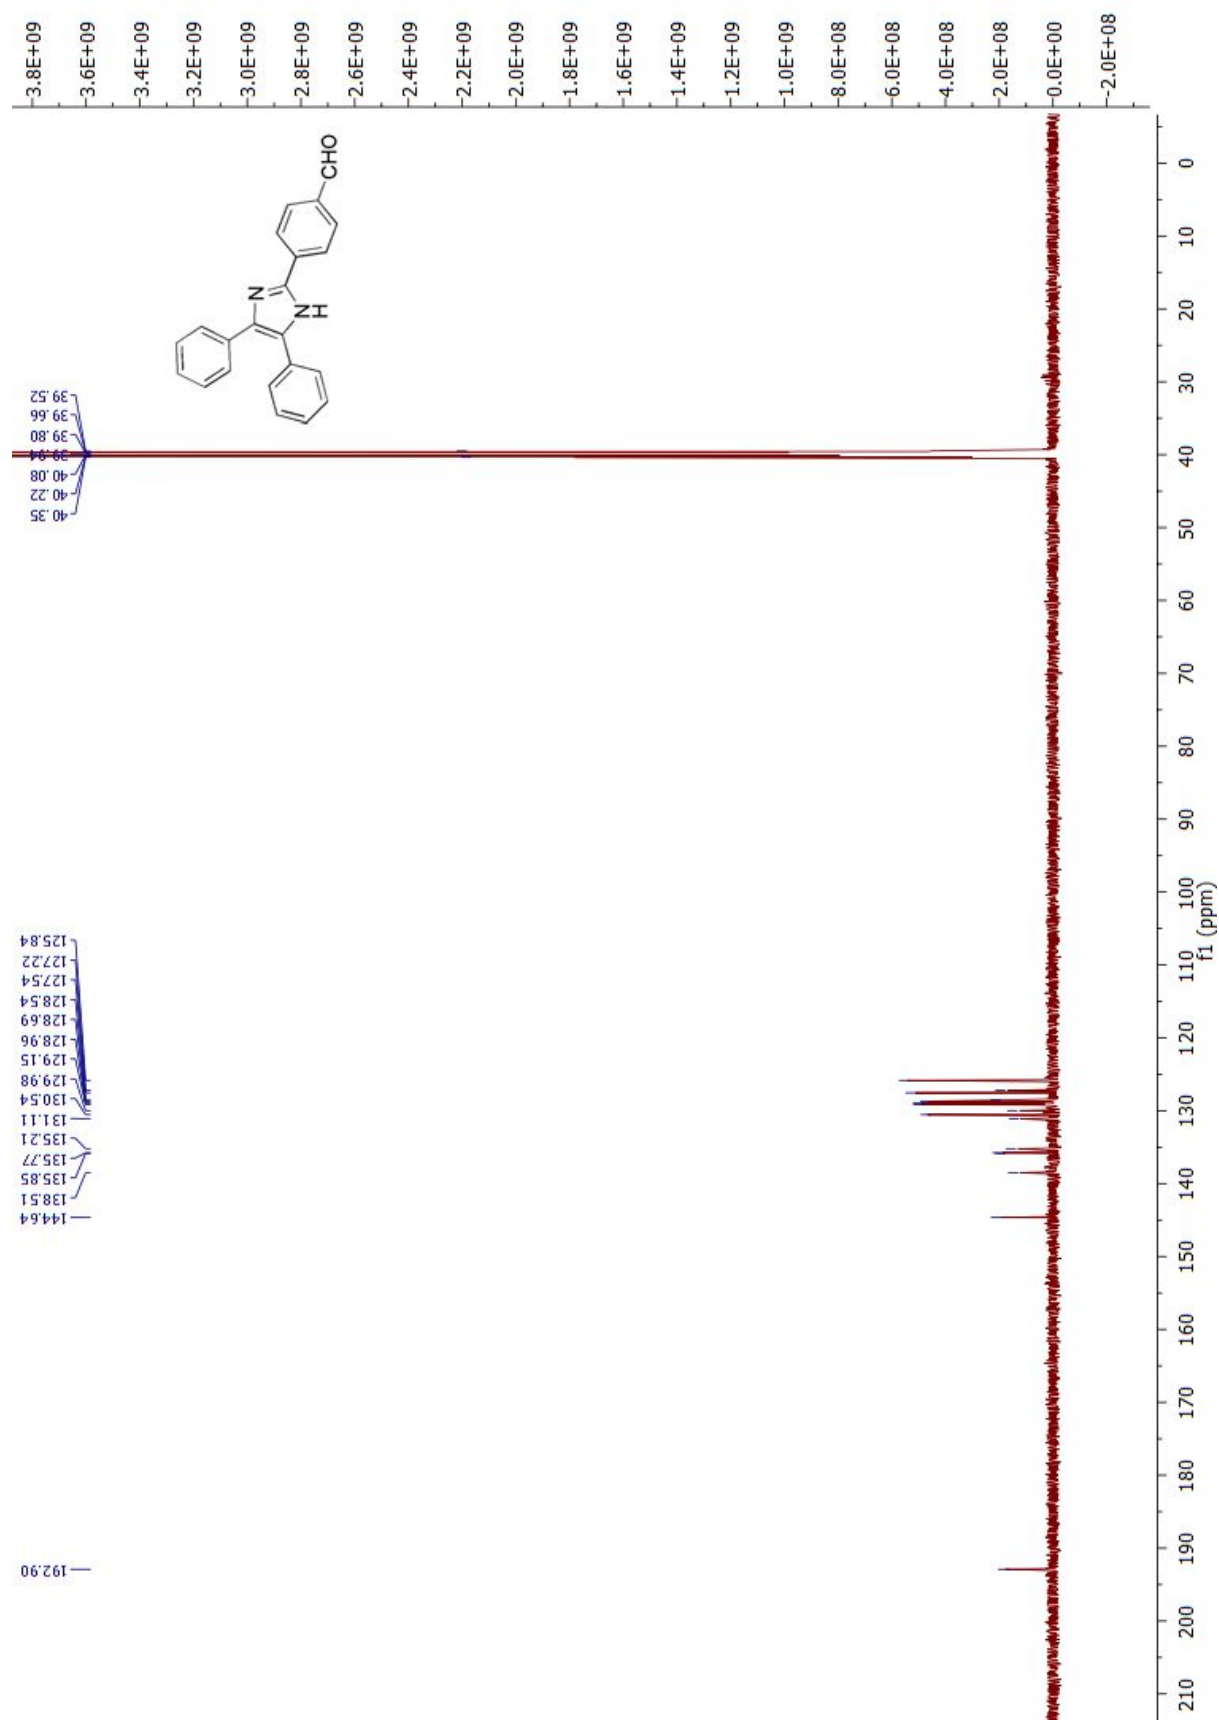

Figure S51: <sup>1</sup>H NMR spectrum of 2-[4,5-Bis-(4-methoxy-phenyl)-1H-imidazol-2-yl]-pyridine (8h) in DMSO-d<sub>6</sub>.

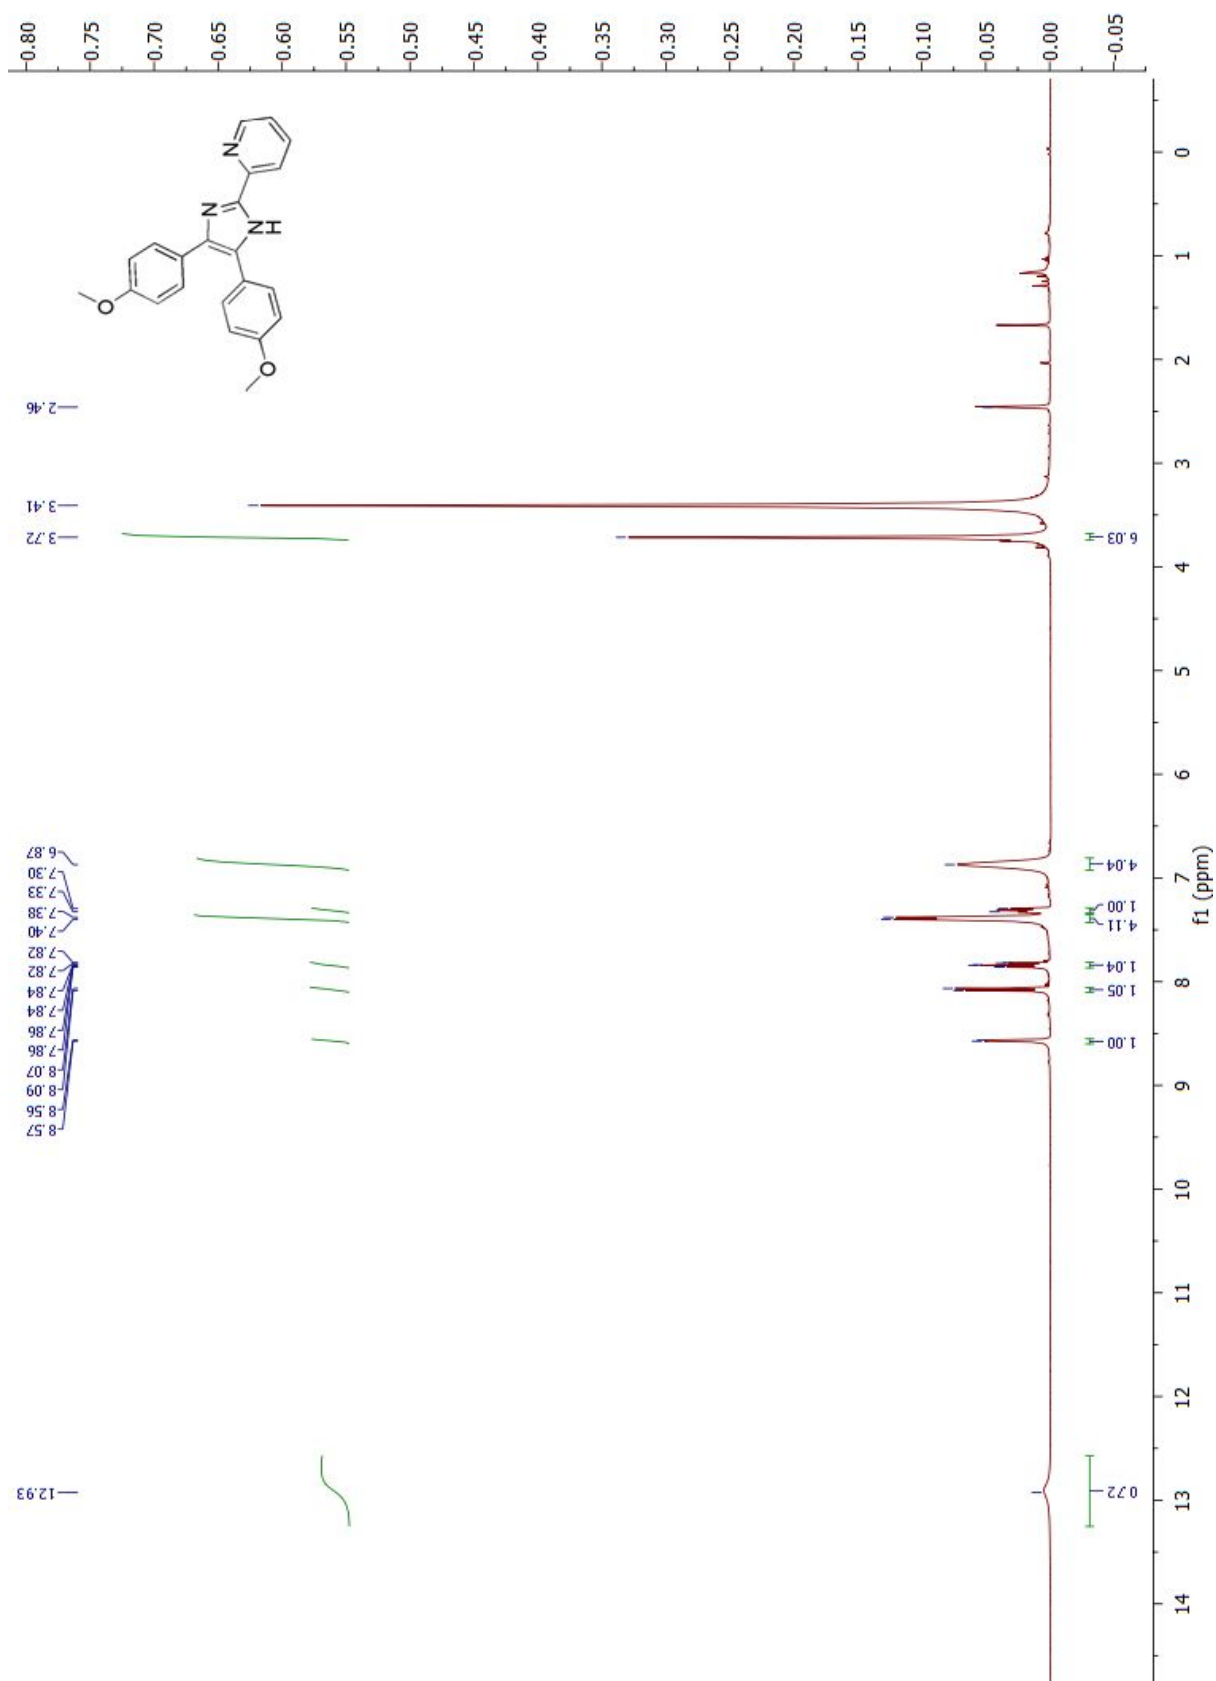

Figure S52:  $^{13}\text{C}$  NMR spectrum of 2-[4,5-Bis-(4-methoxy-phenyl)-1H-imidazol-2-yl]-pyridine (8h) in  $\text{DMSO-d}_6$ .

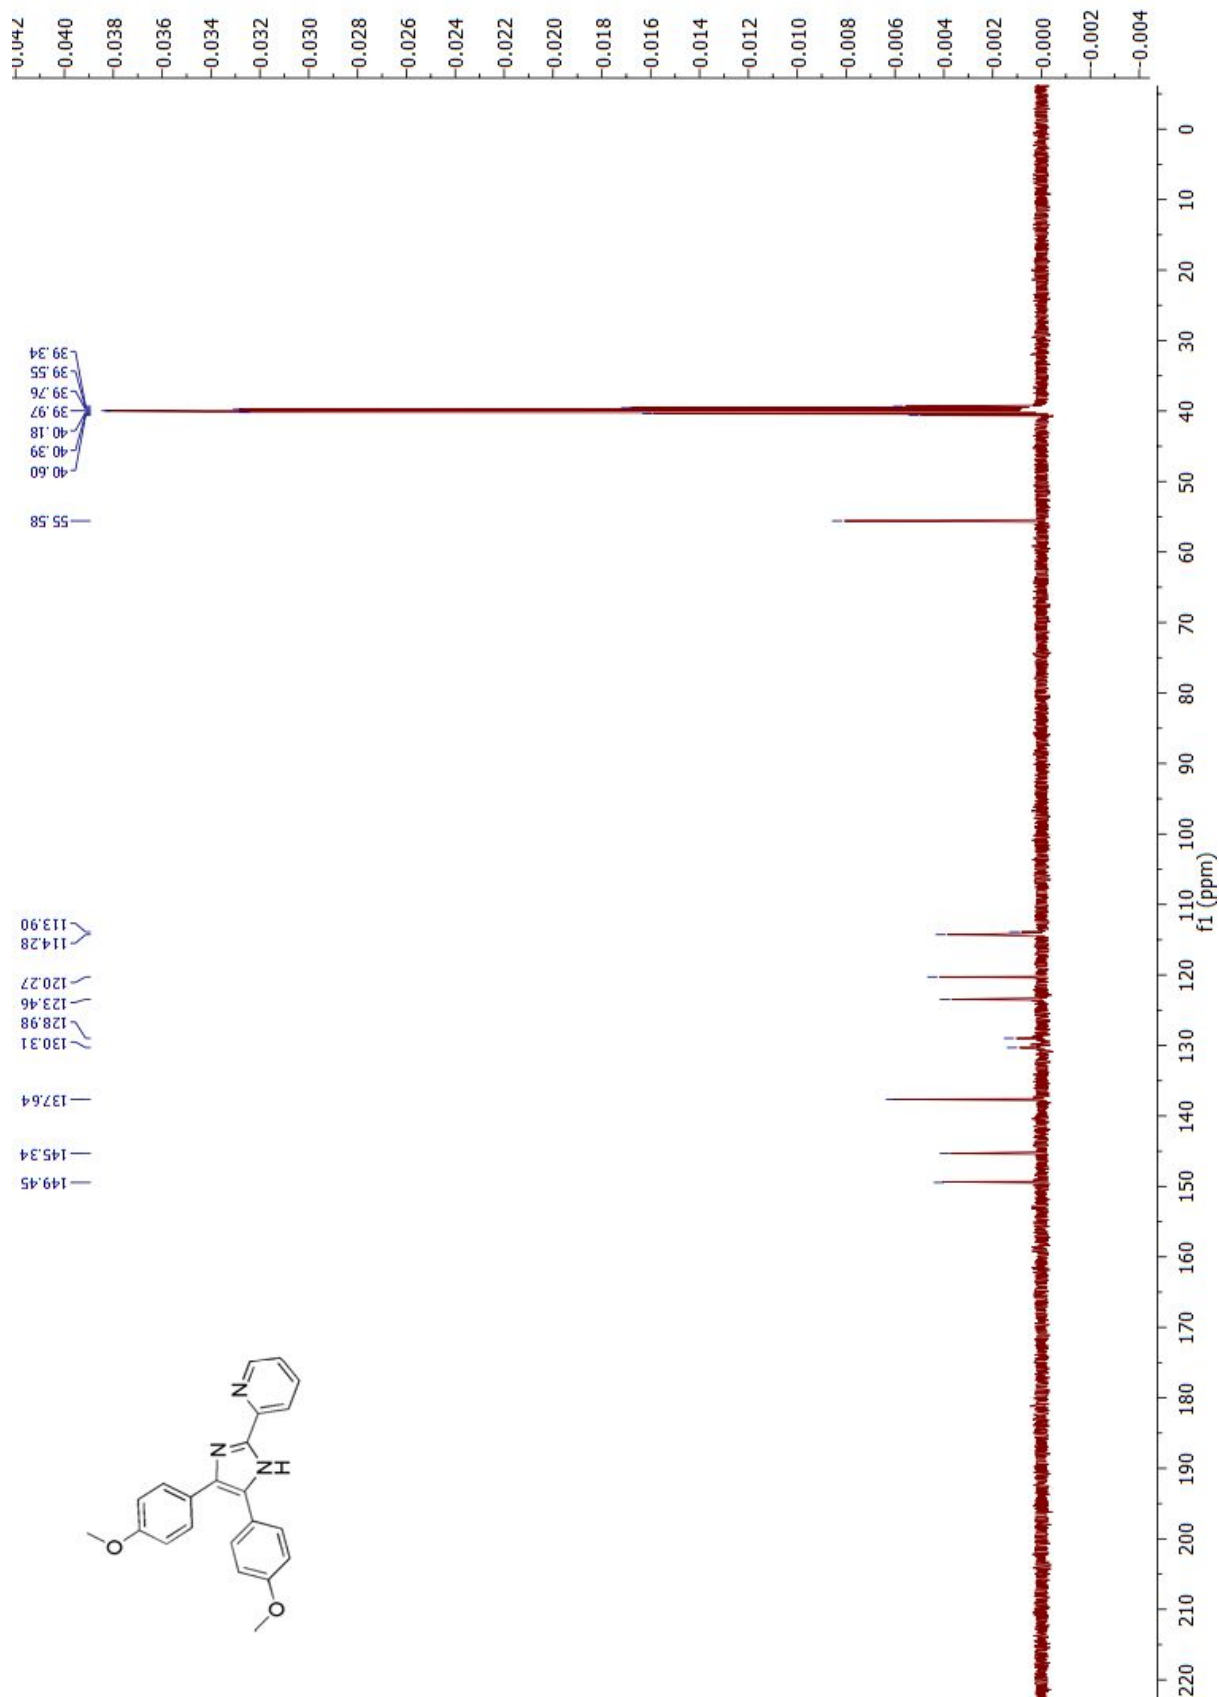

**Figure S53:**  $^1\text{H}$  NMR spectrum of 1-(4-Bromo-phenyl)-2-(4-chloro-phenyl)-4,5-diphenyl-1H-imidazole (10a) in  $\text{DMSO-d}_6$ .

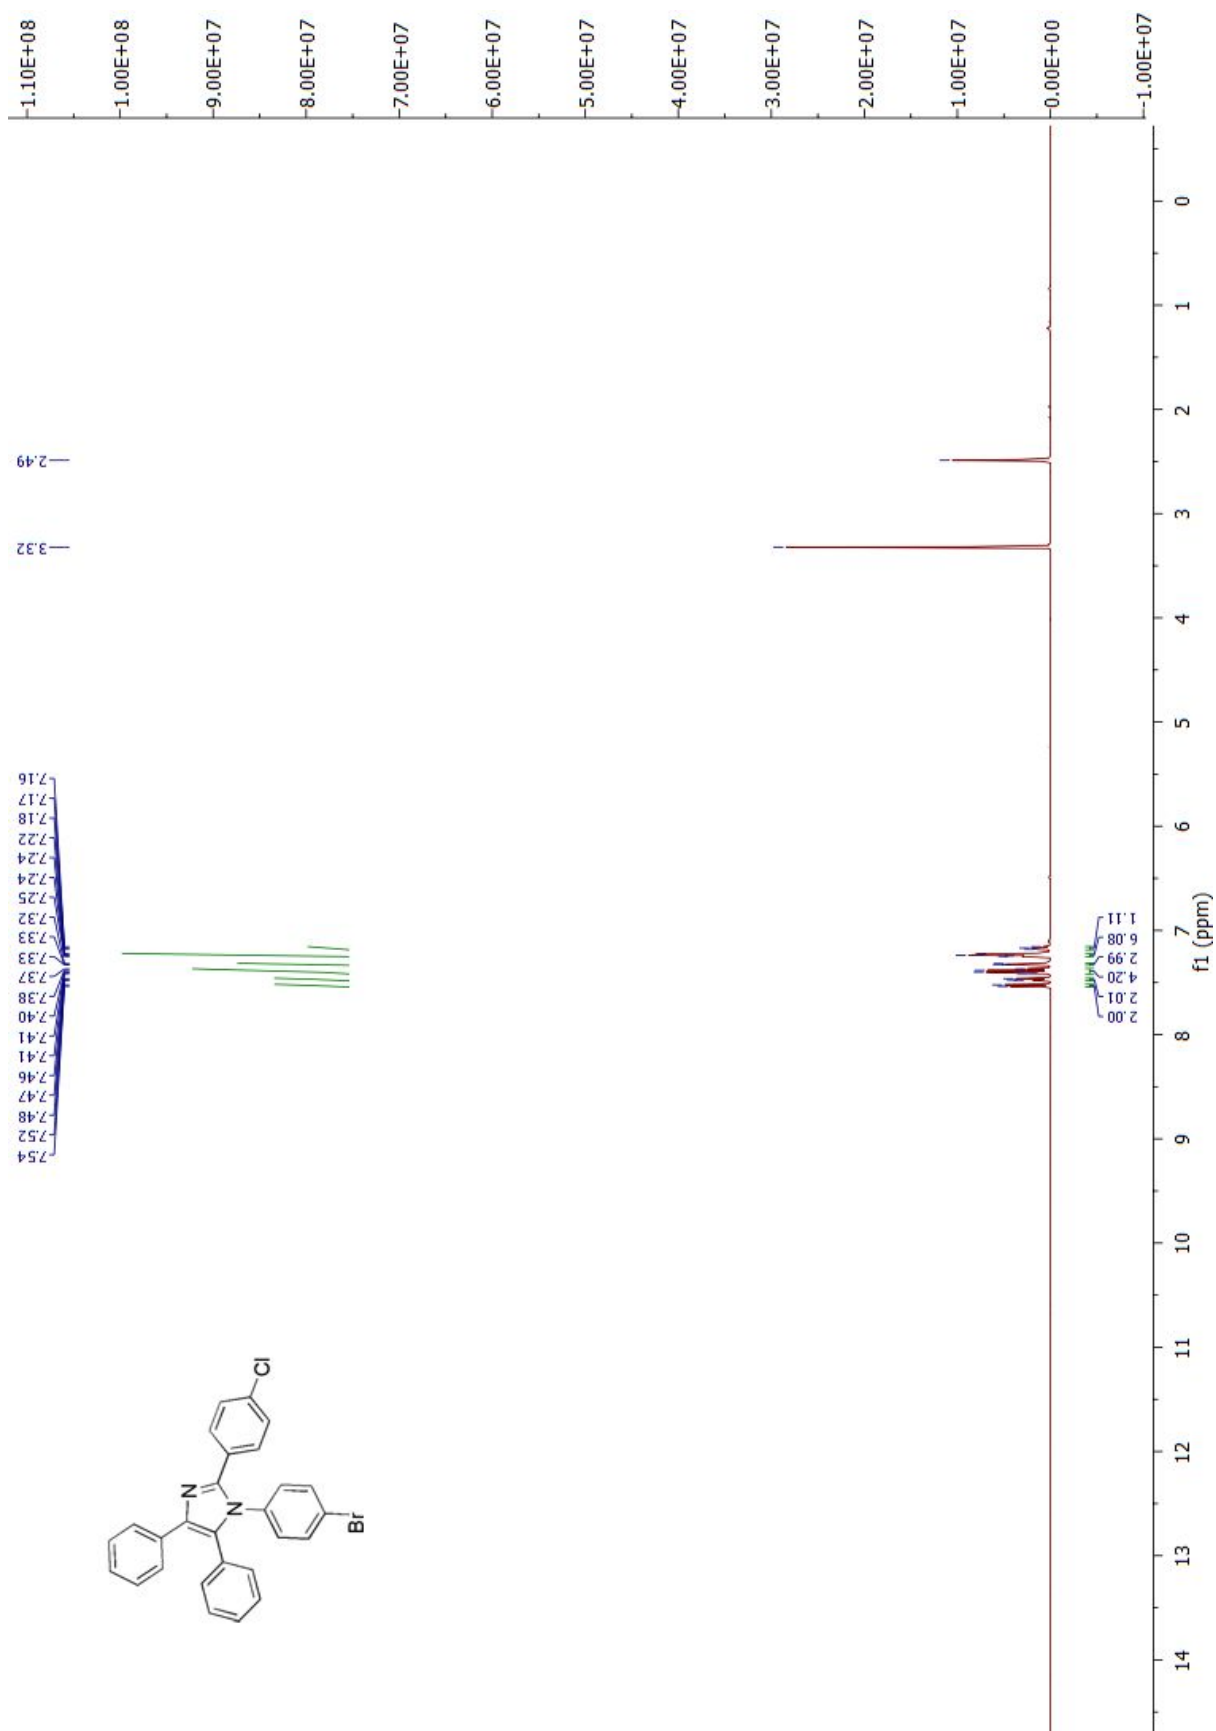

Figure S54:  $^{13}\text{C}$  NMR spectrum of 1-(4-Bromo-phenyl)-2-(4-chloro-phenyl)-4,5-diphenyl-1H-imidazole (10a) in  $\text{DMSO-d}_6$ .

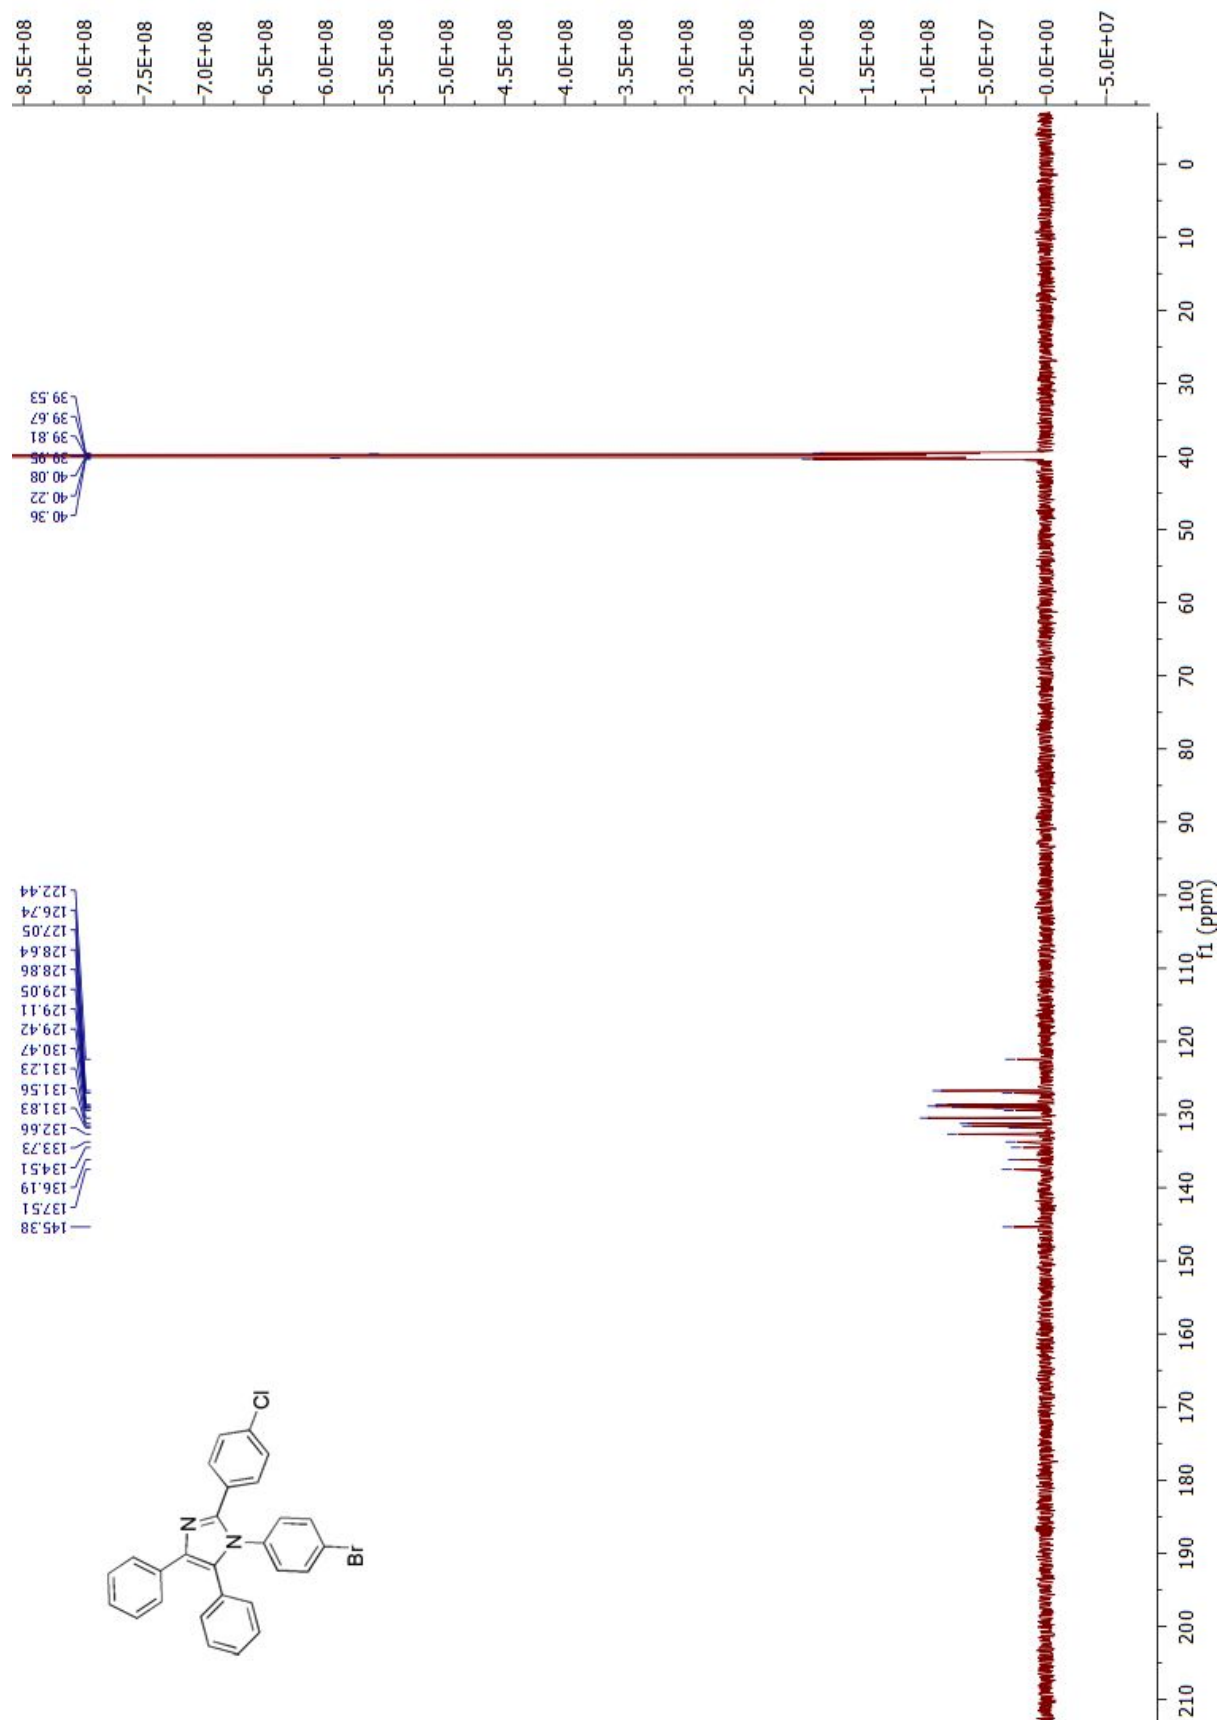



Figure S55:  $^1\text{H}$  NMR spectrum of 1,2-bis(4-methoxyphenyl)ethane-1,2-dione (**1c**) in  $\text{CDCl}_3$ .

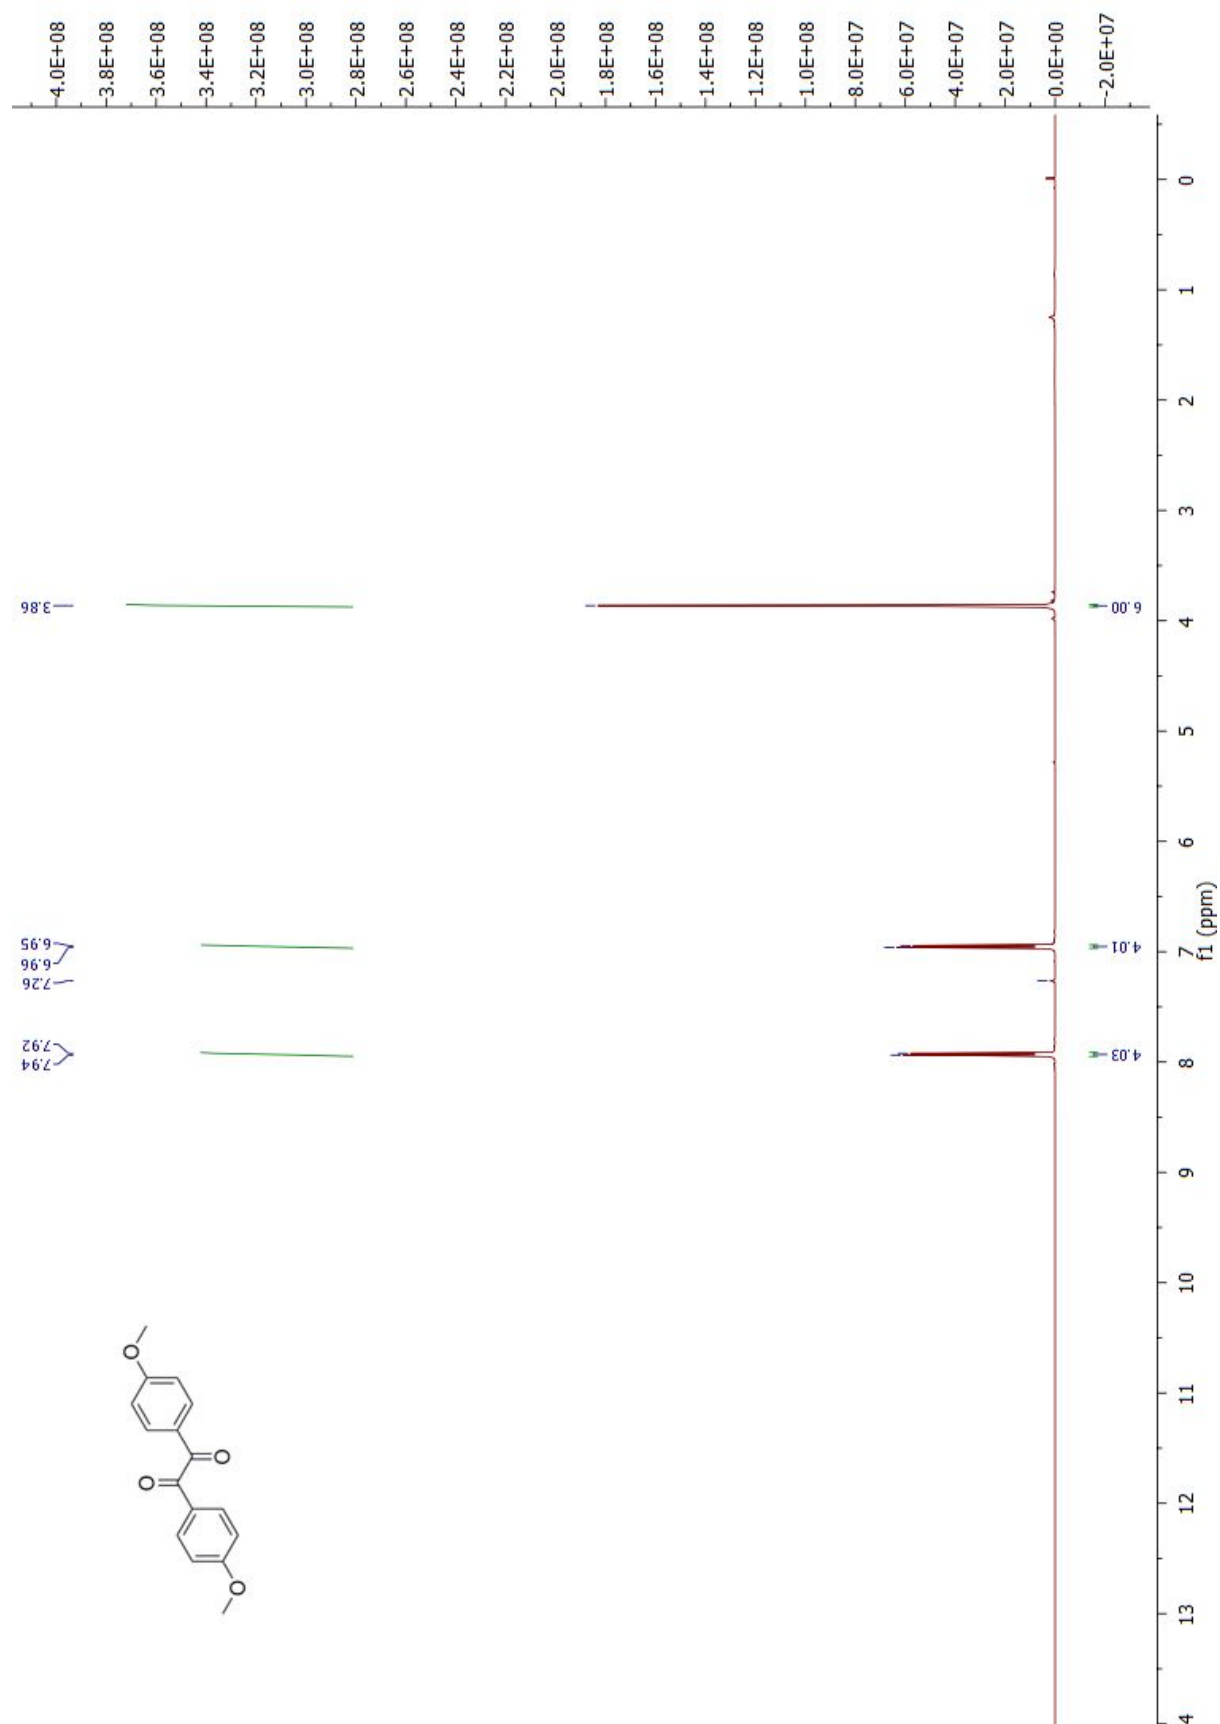

Figure S56:  $^{13}\text{C}$  NMR spectrum of 1,2-bis(4-methoxyphenyl)ethane-1,2-dione (**1c**) in  $\text{CDCl}_3$ .

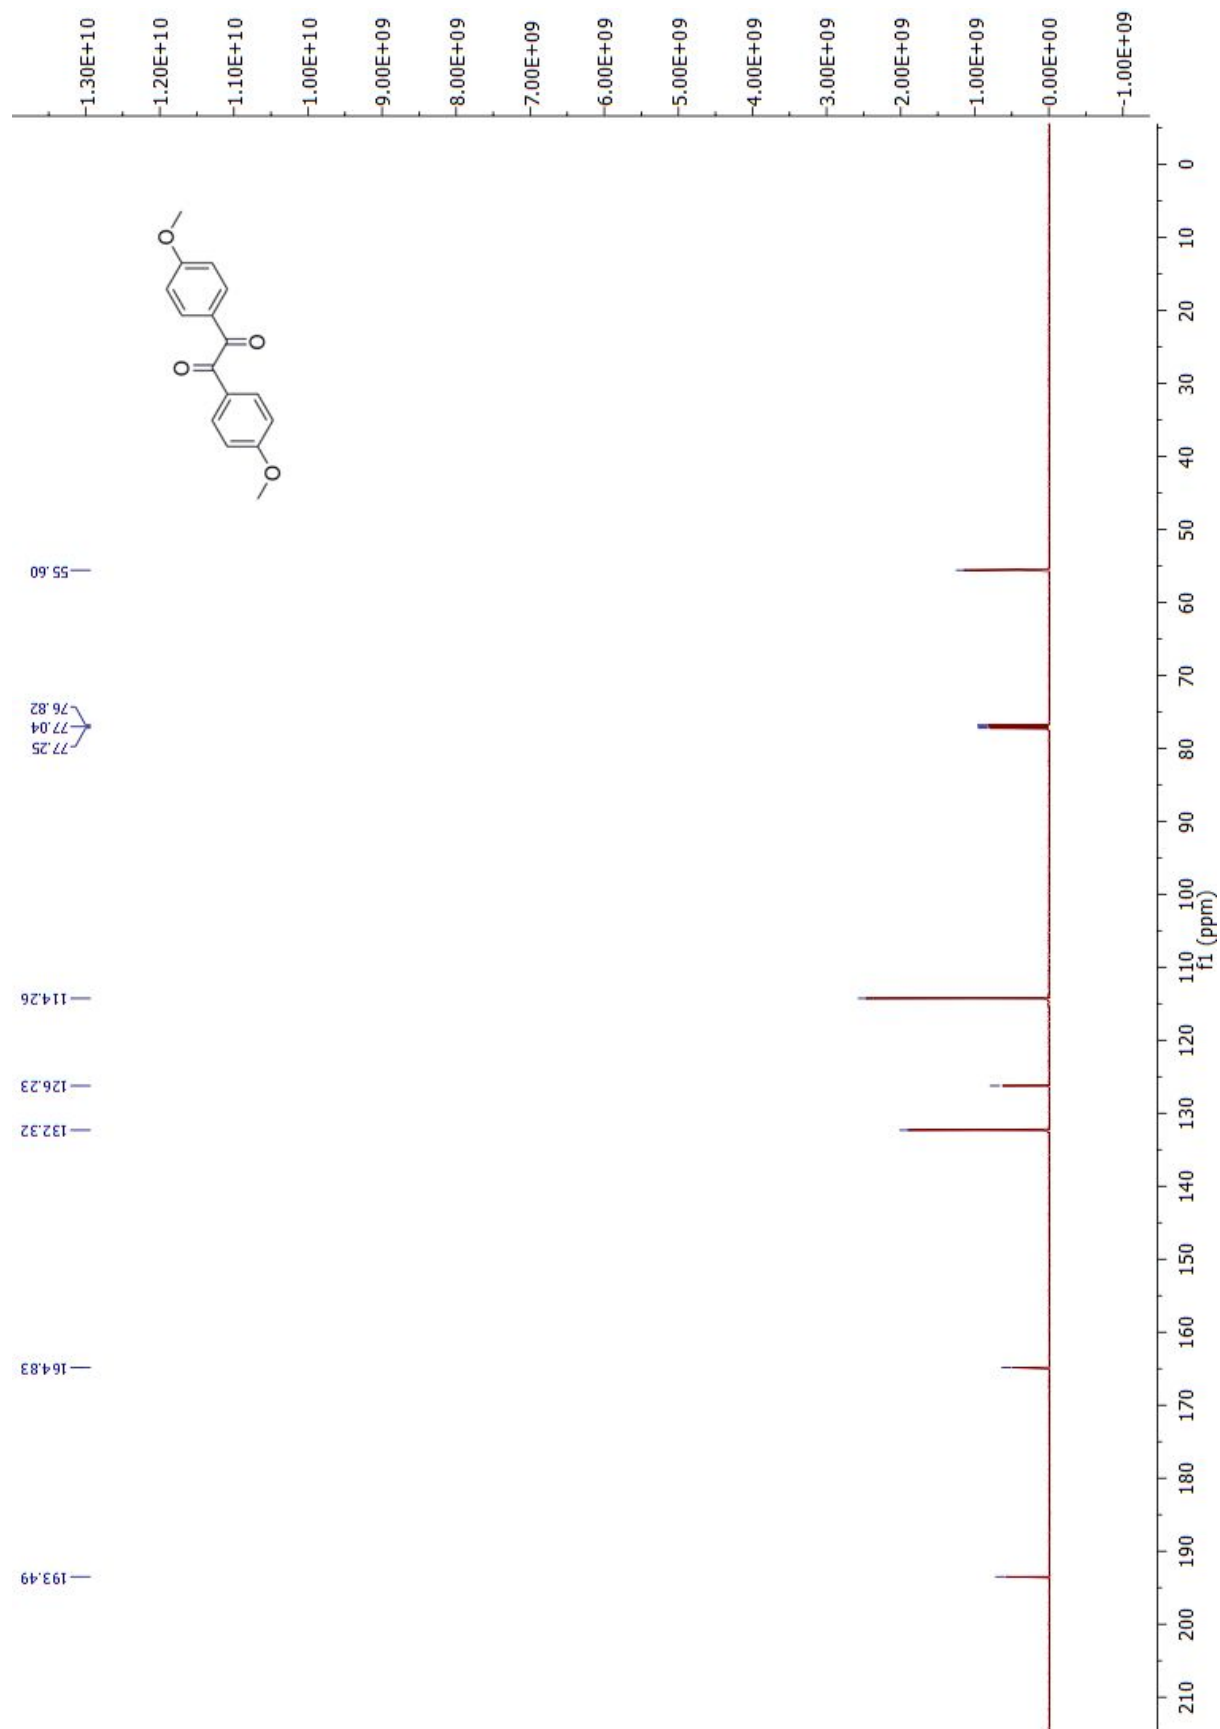

Figure S57: <sup>1</sup>H NMR spectrum of Benzyl-[2-benzylimino-1,2-bis-(4-methoxy-phenyl)-ethylidene]-amine (A) in CDCl<sub>3</sub>.

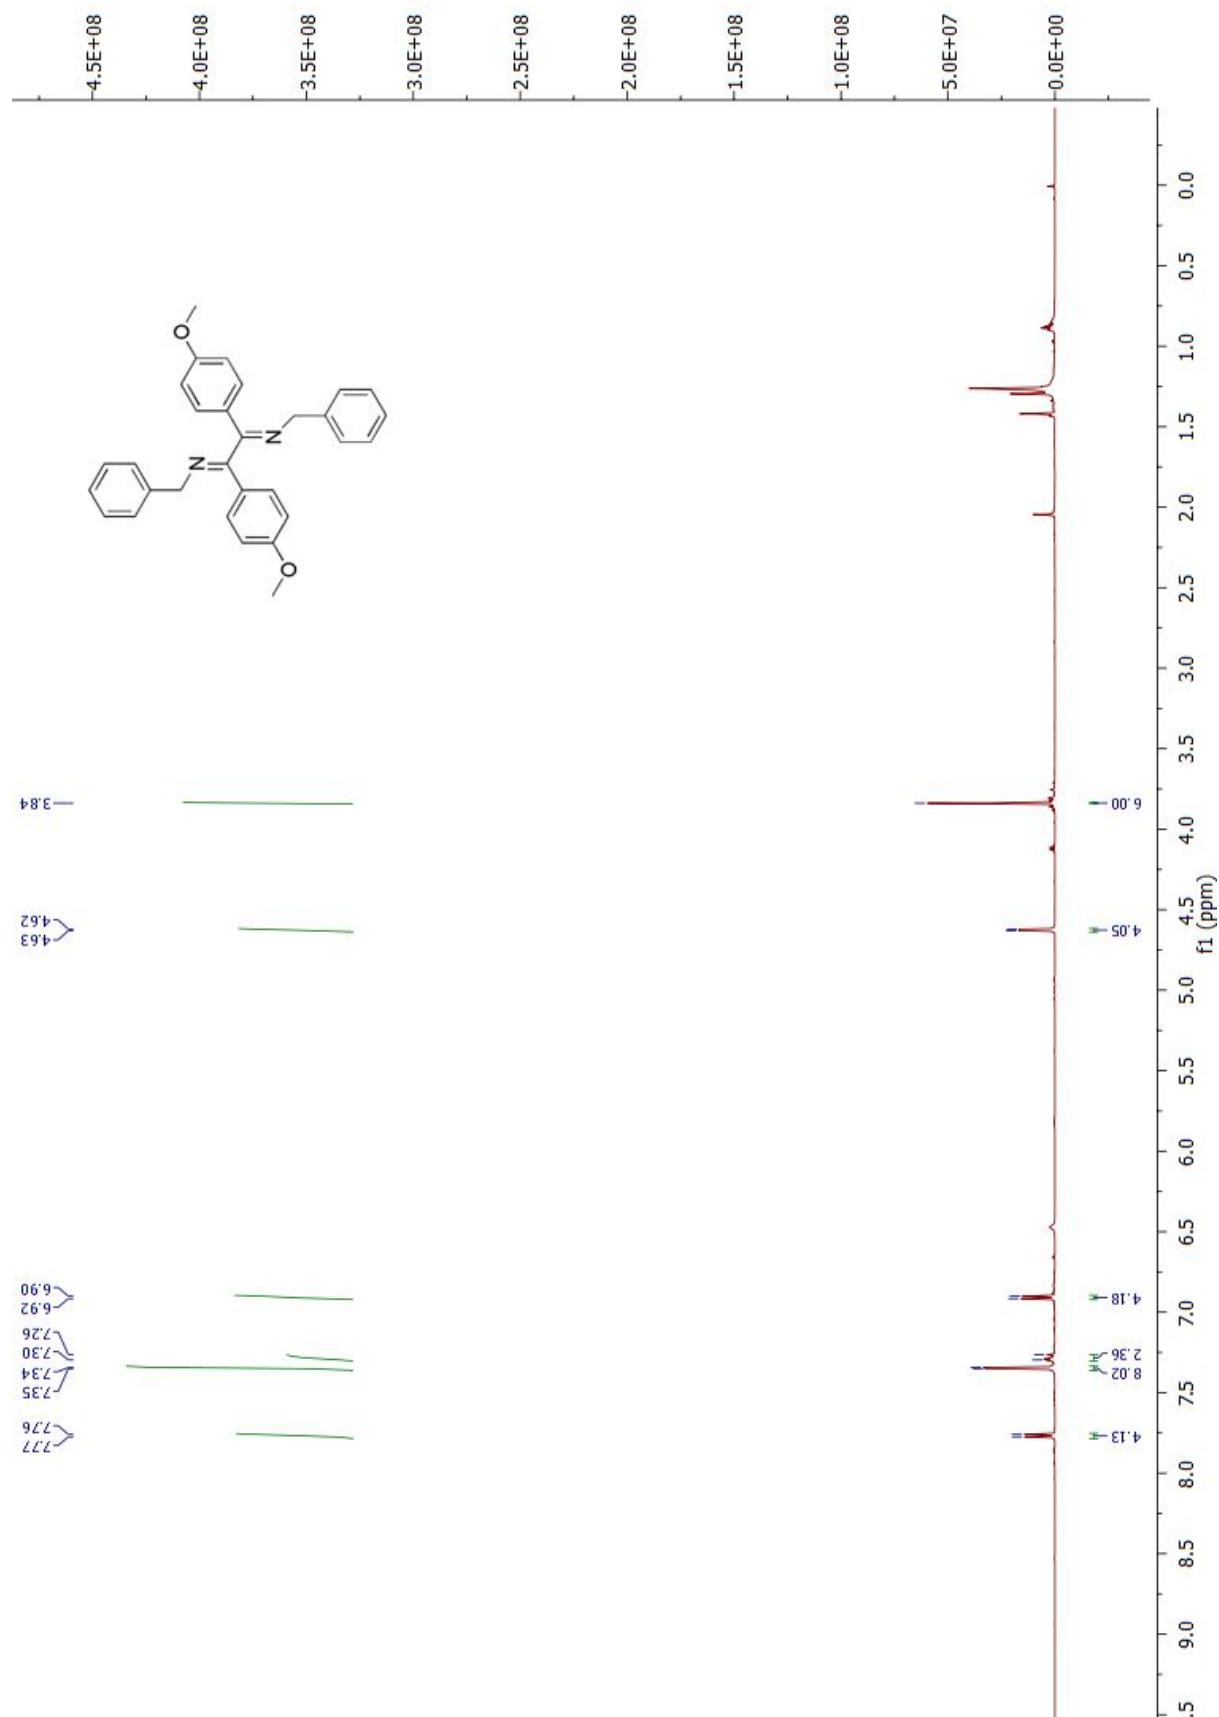

Figure S58:  $^{13}\text{C}$  NMR spectrum of Benzyl-[2-benzylimino-1,2-bis-(4-methoxy-phenyl)-ethylidene]-amine (A) in  $\text{CDCl}_3$ .

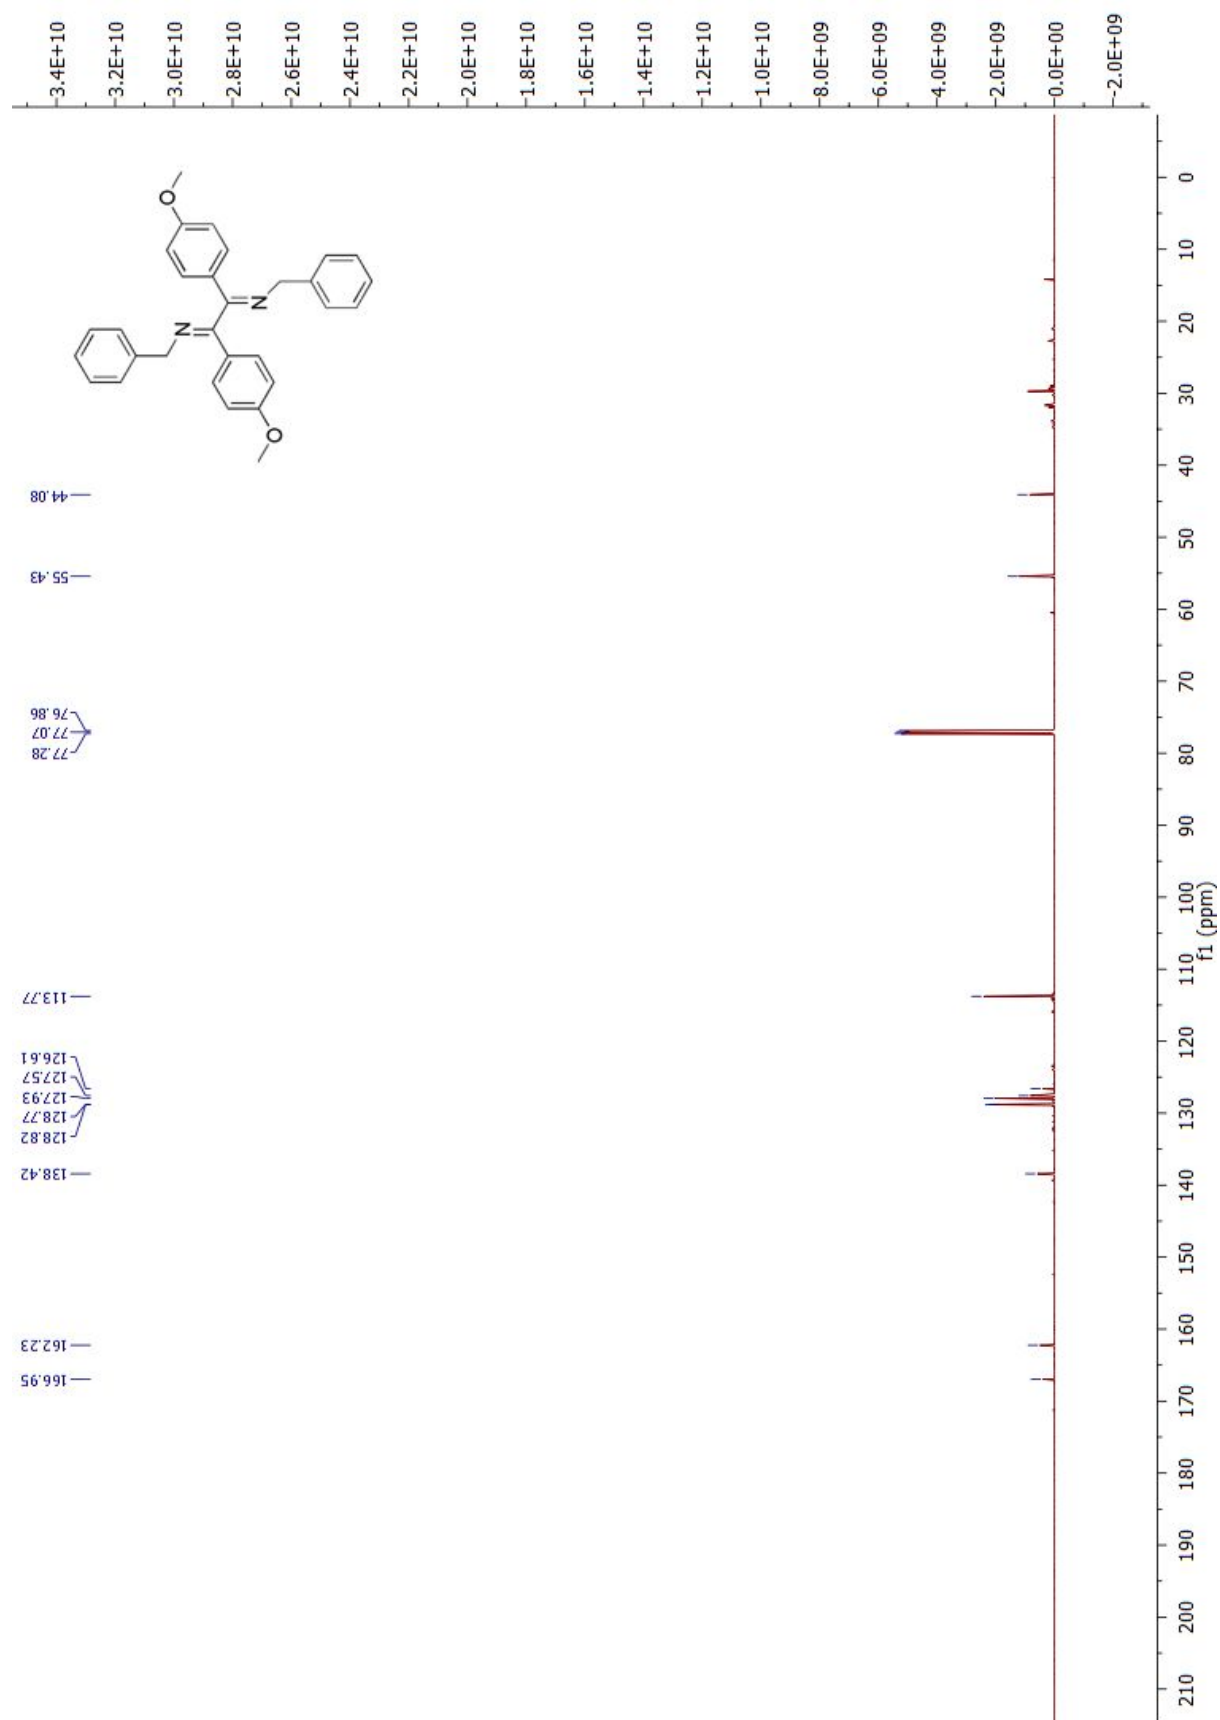

## X-ray Diffraction Analysis of Compound **31** :

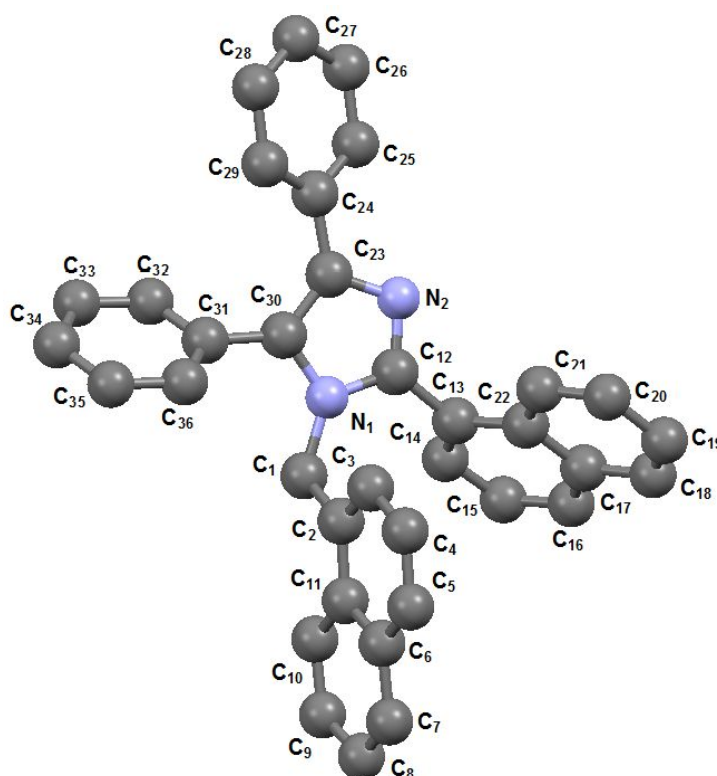

**Figure S59.** ORTEP diagram (ball and stick plot) of product **31** (drawn at 50% probability level) and hydrogens are omitted for clarity. Colour code: nitrogen in blue and carbon in grey.

---

## X-Ray Crystallographic Information of Product **31**:

The Single crystal of imidazole derivative **31** was acquired by slow evaporation of petroleum ether at room temperature. The entire diffraction data of compound **31** was measured with MoK $\alpha$  radiation ( $\lambda = 1.54178 \text{ \AA}$ ) at 100 K. The structure of the single crystal of imidazole derivative **31** was solved by using the SHELXS-97 program.<sup>1</sup> Refinements were carried out by full matrix least-squares process against F using SHELXL-97.2 and the non-hydrogen atoms were refined with anisotropic thermal parameters.<sup>2</sup> All the hydrogen atoms in the crystal structure (**31**) were included in geometric positions and given thermal parameters equivalent to 1.2 times those of the atom to which they were attached. All the essential crystal data of the imidazole derivative **31** is given below:

---

**Table S1:** Important crystal data of product **3l**.

---

|                                  |                                                                                                |
|----------------------------------|------------------------------------------------------------------------------------------------|
| Empirical Formula                | C <sub>36</sub> H <sub>26</sub> N <sub>2</sub>                                                 |
| Formula weight                   | 486.59                                                                                         |
| Temperature                      | 100 K                                                                                          |
| Wave length                      | 1.54178                                                                                        |
| Crystal system                   | Monoclinic                                                                                     |
| Space group                      | P 1 21/c 1                                                                                     |
| Unit cell dimensions             | a = 9.9474(3) Å    α = 90<br>b = 14.0292(4) Å    β = 91.9680(10)<br>c = 18.0762(6) Å    γ = 90 |
| Volume                           | 2521.12(13) Å <sup>3</sup>                                                                     |
| Z                                | 4                                                                                              |
| Density (calculated)             | 1.282 g/cm <sup>3</sup>                                                                        |
| Absorption coefficient (Mu)      | 0.571mm <sup>-1</sup>                                                                          |
| F(000)                           | 1024                                                                                           |
| Theta range for data collection  | 5.826° to 66.630°                                                                              |
| Index ranges                     | -11 ≤ h ≤ 10, -16 ≤ k ≤ 16, -21 ≤ l ≤ 21                                                       |
| Reflection collected             | 35722                                                                                          |
| Independent reflection           | 4337 [R <sub>int</sub> = 0.0379, R <sub>sigma</sub> = 0.0261]                                  |
| Absorption correction            | multi-scan                                                                                     |
| Data/restraints/parameters       | 4337/0/343                                                                                     |
| Good of fit on (F <sup>2</sup> ) | 1.054                                                                                          |
| Final R indices [I ≥ 2σ (I)]     | R <sub>1</sub> = 0.0355, wR <sub>2</sub> = 0.0888                                              |
| R indices (all data)             | R <sub>1</sub> = 0.0364, wR <sub>2</sub> = 0.0896                                              |

---

The crystal data of product **3l** was deposited at the Cambridge Crystallographic Data Centre. The CCDC reference number is 1948135.

### X-ray Diffraction Analysis of Product 5a:

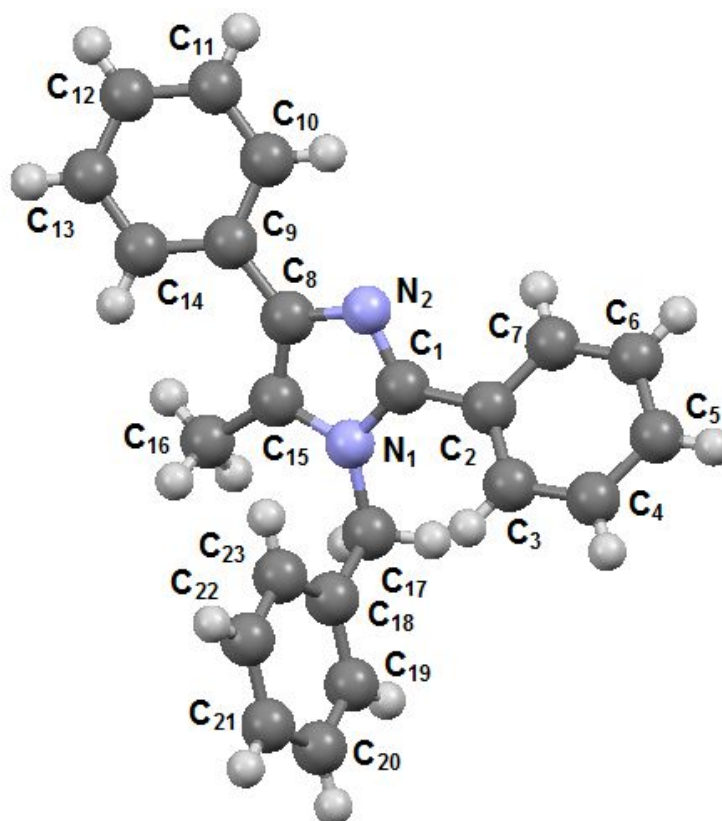

**Figure S60.** ORTEP diagram (ball and stick plot) of product **5a** (drawn at 50% probability level) and hydrogens are omitted for clarity. Colour code: nitrogen in blue and carbon in grey.

---

### X-Ray Crystallographic Information of Product 5a:

The Single crystal of imidazole derivative **5a** was acquired by slow evaporation of petroleum ether at room temperature. The diffraction data of compound **5a** was measured by MoK $\alpha$  radiation ( $\lambda = 1.54178\text{\AA}$ ) at 101 K. The structure of the single crystal of imidazole derivative **5a** was solved by using the SHELXS-97 program.<sup>1</sup> Refinements were carried out by full matrix least-squares process against F using SHELXL-97.2 and the non-hydrogen atoms were refined with anisotropic thermal parameters.<sup>2</sup> All the hydrogen atoms in the crystal structure (**5a**) were included in geometric positions and given thermal parameters equivalent to 1.2 times those of the atom to which they were attached. All the necessary crystal data of the imidazole derivative **5a** is given below:

---

**Table S2:** Important crystal data of product **5a**.

---

|                                  |                                                                                             |
|----------------------------------|---------------------------------------------------------------------------------------------|
| Empirical Formula                | C <sub>23</sub> H <sub>20</sub> N <sub>2</sub>                                              |
| Formula weight                   | 324.41                                                                                      |
| Temperature                      | 101 K                                                                                       |
| Wave length                      | 1.54178                                                                                     |
| Crystal system                   | monoclinic                                                                                  |
| Space group                      | C 1 c 1                                                                                     |
| Unit cell dimensions             | a = 6.9727(11) Å    α = 90<br>b = 19.869(3) Å    β = 91.013(4)<br>c = 12.956(2) Å    γ = 90 |
| Volume                           | 1794.7(5) Å <sup>3</sup>                                                                    |
| Z                                | 4                                                                                           |
| Density (calculated)             | 1.201 g/cm <sup>3</sup>                                                                     |
| Absorption coefficient (Mu)      | 0.541 mm <sup>-1</sup>                                                                      |
| F(000)                           | 688.0                                                                                       |
| Theta range for data collection  | 4.450° to 72.584°                                                                           |
| Index ranges                     | -8 ≤ h ≤ 8, -24 ≤ k ≤ 24, -16 ≤ l ≤ 15                                                      |
| Reflection collected             | 12501                                                                                       |
| Independent reflection           | 3254 [R <sub>int</sub> = 0.0431, R <sub>sigma</sub> = 0.0385]                               |
| Absorption correction            | multi-scan                                                                                  |
| Data/restraints/parameters       | 3254/2/227                                                                                  |
| Good of fit on (F <sup>2</sup> ) | 1.104                                                                                       |
| Final R indices [I ≥ 2σ (I)]     | R <sub>1</sub> = 0.0353, wR <sub>2</sub> = 0.0871                                           |
| R indices (all data)             | R <sub>1</sub> = 0.0354, wR <sub>2</sub> = 0.0871                                           |

---

The crystal data of product **5a** was deposited at the Cambridge Crystallographic Data Centre. The CCDC reference number is 1948126.

#### 4. References:

1. Sheldrick, G. M.; Phase Annealing in SHELX-90: Direct Methods for Larger Structures. *Acta Cryst.* **1990**, *A46*, 467-473.
2. Sheldrick, G. M. *SHELXL-97, Program for Crystal Structure Refinement*; Universität Göttingen: Göttingen, Germany, 1997.
